# Supplementary material for: Comparative Genomic Analysis of Citrobacter and Key Genes Essential for the Pathogenicity of Citrobacter koseri
Source: Front Microbiol. 2019 Dec 6;10:2774. doi: 10.3389/fmicb.2019.02774 (PMC6908497; doi:10.3389/fmicb.2019.02774)
Supplement: TABLE S2 — The result of the Identification of Virulence Genes. [file Table_2.xlsx]

## Sheet: VFDB result
Table2:The result of the Identiﬁcation of Virulence Genes
Virluence factor	nucleotide sequence
VFG000121(gb|NP_249453) (algU) alginate biosynthesis protein AlgZ/FimS [Alginate (VF0091)] [Pseudomonas aeruginosa PAO1]	ATGCTAACCCAGGAACAGGATCAGCAACTGGTTGAACGGGTACAGCGCGGAGACAAGCGGGCTTTCGATCTGCTGGTACTGAAATACCAGCACAAGATACTGGGATTGATCGTGCGGTTCGTGCACGACGCCCAGGAAGCCCAGGACGTAGCGCAGGAAGCCTTCATCAAGGCATACCGTGCGCTCGGCAATTTCCGCGGCGATAGTGCTTTTTATACCTGGCTGTATCGGATCGCCATCAACACCGCGAAGAACCACCTGGTCGCTCGCGGGCGTCGGCCACCGGACAGCGATGTGACCGCAGAGGATGCGGAGTTCTTCGAGGGCGACCACGCCCTGAAGGACATCGAGTCGCCGGAACGGGCGATGTTGCGGGATGAGATCGAGGCCACCGTGCAC…
VFG000133(gb|NP_252241) (algA) phosphomannose isomerase / guanosine 5'-diphospho-D-mannose pyrophosphorylase [Alginate (VF0091)] [Pseudomonas aeruginosa PAO1]	ATGATCCCAGTAATCCTTTCCGGTGGCAGCGGCTCGCGACTCTGGCCTCTTTCCCGCAAGCAGTACCCCAAGCAGTTCCTCGCCCTCACCGGCGACGACACCCTGTTCCAGCAGACCATCAAGCGCCTGGCCTTCGACGGCATGCAGGCACCGCTGCTGGTGTGCAACAAGGAGCACCGCTTCATCGTCCAGGAACAGCTGGAGGCACAGAACCTGGCGAGCCAGGCGATCCTCCTCGAACCCTTCGGCCGCAACACGGCGCCGGCGGTGGCCATCGCCGCGATGAAACTGGTCGCCGAAGGCCGCGACGAACTGCTGCTGATCCTTCCCGCCGACCACGTGATCGAGGACCAGCGCGCCTTCCAGCAGGCCCTGGCGCTGGCCACCAACGCCGCCGAA…
VFG000143(gb|NP_253699) (waaF) heptosyltransferase I [LPS (VF0085)] [Pseudomonas aeruginosa PAO1]	ATGAGAATTCTGATCGTAGGTCCCTCCTGGGTGGGGGACATGGTGATGGCGCAGACCCTGTTCCAGTGTCTGCGCCAGCGGCATCCCGAGTGCGTGATCGACGTGCTGGCGCCCGAGTGGAGCCGACCGATCCTCGAGCGCATGCCCGAGGTGCGCCAGGCCCTGAGCTTCCCGCTCGGCCACGGGGTGATGGACGTCGCCACACGGCGCCGGATCGGACGCGGCCTGCGCGGTCAGTACGAGCAGGCGATCCTGCTGCCCAACTCGCTGAAGTCGGCGCTGGTGCCCTGGTTCGCCGGAATACCGAAGCGTACCGGCTGGCGCGGCGAGATGCGCTACGGGCTGCTCAATGACATCCGCAAGCTCGACAAGCAGCGCTATCCGCTGATGATCGAACGC…
VFG000251(gb|NP_273131) (siaD/synD) polysialic acid capsule biosynthesis protein SiaD; disrupted by foreign ermC cassette [Capsule (VF0079)] [Neisseria meningitidis MC58]	ATGCTAAAGAAAATAAAAAAAGCTCTTTTTCAGCCTAAAAAGTTTTTTCAAGATTCAATGTGGTTGACAACATCTCCATTTTATCTTACCCCCCCACGTAACAATTTATTTGTCATATCTAATTTAGGTCAGCTTAACCAAGTCCAAAGCCTAATTAAAATACAAAAATTAACCAATAATTTACTAGTAATTTTATATACTTCTAAAAACTTAAAAATGCCTAAGTTAGTTCATCAATCAGCTAACAAGAATCTATTTGAATCTATTTATCTATTTGAGCTTCCTAGAAGCCCTAATAATATAACTCCTAAAAAATTACTTTATATTTATAGAAGTTACAAAAAAATCCTTAATATTATACAGCCTGCTCATCTCTATATGCTGTCTTTTACAGGCCAC…
VFG000358(gb|NP_405467) (fyuA) pesticin/yersiniabactin receptor protein [Yersiniabactin (VF0136)] [Yersinia pestis CO92]	ATGAAAATGACACGGCTTTATCCTCTGGCCTTGGGGGGATTATTGCTCCCCGCCATTGCTAATGCCCAGACTTCACAGCAAGACGAAAGCACGCTGGTGGTTACCGCCAGTAAACAATCTTCCCGCTCGGCATCAGCCAACAACGTCTCGTCTACTGTTGTCAGCGCGCCGGAATTAAGCGACGCCGGCGTCACCGCCAGCGACAAACTCCCCAGAGTCTTGCCCGGGCTCAATATTGAAAATAGCGGCAACATGCTTTTTTCGACGATCTCGCTACGCGGCGTCTCTTCAGCGCAGGACTTCTATAACCCCGCCGTCACCCTGTATGTCGATGGCGTCCCTCAGCTTTCCACCAACACCATCCAGGCGCTTACCGATGTGCAAAGCGTGGAGTTGCTG…
VFG000359(gb|NP_405468) (ybtE) yersiniabactin siderophore biosynthetic protein [Yersiniabactin (VF0136)] [Yersinia pestis CO92]	ATGAATTCTTCCTTTGAATCTCTGATTGAACAGTATCCCTTACCCATTGCCGAACAGTTGCGCCACTGGGCGGCCCGTTATGCCTCGCGAATTGCCGTCGTTGATGCAAAGGGGTCGTTAACCTACAGCGCGCTTGATGCACAAGTTGACGAACTTGCCGCAGGTCTGTCATCACTGGGTTTGCGTTCGGGGGAGCATGTAATTGTGCAGCTTCCCAACGACAACGCGTTTGTTACCCTGCTGTTCGCCTTGTTAAGACTGGGCGTTATCCCCGTGCTGGCGATGCCCTCGCAACGGGCGCTGGATATCGACGCGCTGATTGAGCTGGCGCAACCCGTCGCTTACGTTATTCACGGGGAAAACCACGCAGAGCTGGCCCGACAGATGGCGCACAAACAC…
VFG000360(gb|NP_405469) (ybtT) yersiniabactin biosynthetic protein YbtT [Yersiniabactin (VF0136)] [Yersinia pestis CO92]	GTGACGCAATCTGCAATGTGCATCCCGCTGTGGCCCGCCCGGAACGGCAATACTGCGCATCTGGTCATGTGCCCTTTCGCTGGCGGCAGCAGTAGCGCGTTTCGCCACTGGCAAGCTGAGCAACTGACTGATTGCGCGCTTTCTCTGGTGACCTGGCCGGGGCGCGATCGCCTTCGCCATCTGGAACCGCTCAGAAGCATTACACAACTGGCGGCACTGCTGGCGAACGAGCTGGAAGCATCCGTATCGCCTGACACGCCGCTTTTACTCGCCGGGCACAGCATGGGGGCGCAGGTGGCGTTTGAAACCTGCCGACTTCTGGAGCAACGGGGGCTTGCGCCACAAGGACTGATTATTTCCGGGTGCCATGCCCCGCATCTGCATTCTGAACGCCAGCTC…
VFG000361(gb|NP_405470) (ybtU) yersiniabactin biosynthetic protein YbtU [Yersiniabactin (VF0136)] [Yersinia pestis CO92]	ATGATGCCGTCCGCCTCCCCAAAACAACGCGTACTGATTGTGGGCGCCAAATTTGGCGAAATGTACCTGAATGCCTTTATGCAGCCCCCGGAGGGGCTGGAACTGGTCGGCCTGCTGGCGCAGGGAAGCGCCCGTTCAAGAGAGCTGGCTCATGCGTTTGGCATTCCGCTGTATACCTCGCCGGAACAGATAACCAGGATGCCGGATATCGCCTGTATTGTCGTGCGTTCGACCGTCGCCGGAGGAACCGGTACGCAGCTTGCCAGACACTTTCTGACGCGCGGCGTACACGTCATTCAGGAGCATCCCCTCCACCCGGATGACATCAGTTCCTTACAAACGCTGGCGCAGGAACAGGGCTGCTGCTATTGGGTAAACACGTTTTATCCGCATACGCGC…
VFG000362(gb|NP_405471) (irp1) yersiniabactin biosynthetic protein Irp1 [Yersiniabactin (VF0136)] [Yersinia pestis CO92]	ATGGATAACTTGCGCTTCTCTTCTGCGCCGACAGCAGATTCCATTGATGCATCGATCGCTCAACACTACCCGGACTGCGAACCTGTCGCGGTTATCGGCTACGCCTGCCATTTTCCTGAATCGCCGGATGGCGAAACGTTCTGGCAAAATCTGCTGGAAGGTCGTGAATGCAGCCGACGCTTTACGCGCGAAGAGCTTCTGGCCGTCGGTCTGGATGCCGCCATCATTGACGATCCTCATTATGTCAATATCGGTACGGTGTTAGACAACGCCGACTGCTTCGACGCCACCCTGTTTGGCTATTCGCGACAGGAAGCGGAGTCGATGGACCCGCAGCAGCGCCTATTTTTGCAGGCGGTCTGGCATGCGCTGGAACATGCCGGTTATGCCCCCGGCGCC…
VFG000363(gb|NP_405472) (irp2) yersiniabactin biosynthetic protein Irp2 [Yersiniabactin (VF0136)] [Yersinia pestis CO92]	ATGATTTCTGGCGCACCATCTCAGGATTCGCTGTTACCGGACAACCGCCACGCGGCTGATTACCAACAATTACGCGAGCGGCTCATACAGGAACTGAATTTAACGCCGCAGCAGTTACATGAAGAGAGCAACCTGATCCAGGCCGGCCTGGATTCCATAAGATTGATGAGATGGTTACACTGGTTTCGTAAAAATGGCTACCGCCTTACCCTTCGCGAGCTGTATGCCGCCCCCACGCTGGCGGCATGGAACCAGTTAATGCTCAGCCGGTCGCCTGAGAACGCGGAAGAAGAAACGCCGCCCGACGAATCATCCTGGCCGAACATGACCGAAAGTACCCCCTTCCCATTGACGCCAGTACAGCACGCCTACCTGACGGGCCGCATGCCGGGGCAGACG…
VFG000364(gb|NP_405473) (ybtA) transcriptional regulator YbtA [Yersiniabactin (VF0136)] [Yersinia pestis CO92]	ATGACAGAGTCACCGCAAACGCAATCTGAAATCTCTATTCACCAGTTGGTGGTCGGGAAACCTGCAAACGATGGCAATATTCCTGCTCAGTGTGAACTGCTGCGCTGTTCGTTGCAGGAAGGTATGGATATTTTGCTCTGGAGGGGCCATTTTGCGCGGCCTGAGACGTTGCAGCTACACGACGATCTGGGCAGGATTAACTTCTCGTGCATCCTGGAAGGCACATCGCGCTTTGCGATTCAGGGACTCCGGCGCCACACCGACTGGGAGCTTGCGCGCAATCGCCATTACATTACCCATACGCCAGACTGTCGCGGCAGCGCCTCCTATTGTGGCCGATTCGAGAGCATTACCCTCTCCTTCAGCCCTGAAACCCTCGCGCTGTGGGTGCCGGATATT…
VFG000365(gb|NP_405474) (ybtP) lipoprotein inner membrane ABC-transporter [Yersiniabactin (VF0136)] [Yersinia pestis CO92]	ATGTCATCTCAATCATCCAATACTGAATCGCTGTCCCGATTTCCTCTCTGGCAGGTGATTACACCGGTTCGCAGGAAGGTTATTTTAGCTATGGCGCTGGCGGGGCTGGCGGCATTAACCAGCCTGGGGGCGCTCCTTTTTCTGGCGTGGAGCCTGCGTGACATTCGCGCGACGCCTGACGCTATTCCGGCCTGGCCGCTGGGCGGCGTGATCGGCTGCGTGGTCTTAACTTTTGTTCTGCGCTTACAGGCGTTCAACACCTCTCATTACGCGGCTTTTCATCTGGAGAACATTCTGCGCAGCAGGTTAGCCCGTAAAGCATTGCAGCTTCCGCCTGGCGTGTTACAGCAAATGGGCAGCGGGTCAGTGGCGAAAGTGATGCTGGATGACGTGAAGTCG…
VFG000366(gb|NP_405475) (ybtQ) inner membrane ABC-transporter YbtQ [Yersiniabactin (VF0136)] [Yersinia pestis CO92]	ATGAAAGACAATAATCCTGCGGATAACCTGGCCTGGCGCGTCATCTGGCGCCAGCTTATCTCCAGCGTTGGCAGTCAGGCCAGGATGCTGCGACGCAGTATGCTGGCGCTGTTGCTGGCGGCATTCATGCAGGGGATCGCCTTTGCCTGTCTTTATCCGATCATTGATGCGCTGTTACGGGGAGACGCGCCGCAACTTCTTAACTGGGCTATGGCCTTCAGCGTCGCCGCAATTGTGACGCTGGTGCTACGCTGGTATGGCCTGGGCTTTGAATACCGTGGTCATCTGGCGCAGGCCACCCATGAGTTGCGCCTGCGACTTGGCGAGCAGTTACGCCGCGTGCCGCTGGAGAAGCTCCAGCGCGGCAGGGCGGGTGAAATGAACGCCTTGCTGCTGGGC…
VFG000367(gb|NP_405476) (ybtX) putative signal transducer [Yersiniabactin (VF0136)] [Yersinia pestis CO92]	ATGAGTGATGTTCAGTCGAATGTGAAACCGCTGACGTTGACGACCGGGCGGGTGATTTTTGCTATTGCCGGCGTCTATGTGACGCAGAGTCTGGTATCGGCGCTGTCTATGCAGTCCTTACCCGCGCTGGTGCGCGCTGCTGGCGGTTCGCTGGCGCTTGCCGGTGCGACAACCCTGTTTATGCTGCCCTGGGCGCTGAAGTTTATTTGGGCGCCGTGGATCGAGCGCTGGCGGCTTCCGCCCGGTAGCCAGGAACGCCGTTCCCGCATGTTAATCCTGCGTGGTCAGGTCGCGCTAGCGGCGATCCTGACTATTGCCGCAGCGATTGGCTGGTTTGGGCGAGAAGGGGGATTCCCCGATACGCAAATCGTCGCGTTATTTGTTCTGTTTATGGTGGCA…
VFG000368(gb|NP_405477) (ybtS) salicylate synthase Irp9 [Yersiniabactin (VF0136)] [Yersinia pestis CO92]	ATGAAAATCAGTGAATTTCTACATCTGGCGTTACCAGAGGAACAATGGCTACCGACGATTTCTGGCGTTTTACGCCAGTTCGCAGAAGAAGAGTGTTATGTCTATGAGCGTCAACCCTGTTGGTATTTAGGCAAAGGGTGCCAGGCACGGCTGCACATTAATGCCGACGGAACGCAGGCGACATTTATTGATGATGCCGGGGAGCAAAAATGGGCGGTGGATTCCATTGCCGACTGCGCGCGTCGTTTTATGGCGCATCCTCAGGTGAAAGGACGTCGGGTATATGGACAGGTTGGGTTCAACTTTGCGGCGCATGCGCGGGGGATTGCCTTTAACGCCGGGGAGTGGCCGCTGCTGACGTTAACCGTTCCCCGTGAAGAACTTATTTTTGAAAAGGGA…
VFG000417(gb|NP_395233) (pla) plasminogen activator protease precursor [Pla (VF0139)] [Yersinia pestis CO92]	ATGAAGAAAAGTTCTATTGTGGCAACCATTATAACTATTCTGTCCGGGAGTGCTAATGCAGCATCATCTCAGTTAATACCAAATATATCCCCTGACAGCTTTACAGTTGCAGCCTCCACCGGGATGCTGAGTGGAAAGTCTCATGAAATGCTTTATGACGCAGAAACAGGAAGAAAGATCAGCCAGTTAGACTGGAAGATCAAAAATGTCGCTATCCTGAAAGGTGATATATCCTGGGATCCATACTCATTTCTGACCCTGAATGCCAGGGGGTGGACGTCTCTGGCTTCCGGGTCAGGTAATATGGATGACTACGACTGGATGAATGAAAATCAATCTGAGTGGACAGATCACTCATCTCATCCTGCTACAAATGTTAATCATGCCAATGAATATGAC…
VFG000423(gb|NP_458730) (vexE) Vi polysaccharide export protein VexE [Vi antigen (VF0101)] [Salmonella enterica subsp. enterica serovar Typhi str. CT18]	ATGAGCTTGCACTCTACATTTAAAAAAATATCGCCAACCACCCTACTCAAACAAGAGGATTGGGAGGGGCTATGCCTCTATTTCAGTCAGCATCCCGAAAAAGTGCGAGATAGTGCTGGAAATGAGCAAAACATTATTCTCTTCGCTATCGCGTGTTTGCGTAAAGATGAAACAGATGTCGGGCTGACTTTGTTGTCTGACCGTGTGCTGACGGCAAAGAATGGCCGTGATTTATTACGACGCTGGGTTATTTCGCCACTGGCATCATCTCAACCGGACGCTGTACTACAGGTAGTTAATAAACTGCTGGCGGTGAATGTGTGCCAGCCGGAGGATGTCCTGCTGGTCGCGAGCGTGCTGCTTAAGAGTAAACAATATGCGACTGTTGCTGACTTAGCC…
VFG000424(gb|NP_458731) (vexD) Vi polysaccharide export inner-membrane protein VexD [Vi antigen (VF0101)] [Salmonella enterica subsp. enterica serovar Typhi str. CT18]	GTGGAAAATTCAGAACGTATTAAAAAATGGAAAGAAGAAAGAGCGAAGGTAGCACAAGAAAGCCGAGCCTCGCGGCTACAACAAAAAGAGGATGAACGCGCCCTTCGCCAGACGGAAAAATCGGCCGATGCAAAAAGTCATCATAACCCAGACGCCGGGTGGTCTGCGACGGATGCTGATTCTGTCCGTAGAGCGTCATTAGTTATTAAAGAGCGACGTGTTCAGCAAGCCAAGCAATCGCTACGTCGGCTCTTTCTTTATATTGCTTTGCCGCTGCTGGTTATTATGCTTATGTCGTGGATTTTAACATCGCATTTTTATAGTGCGGATGCCACCTTTATTGTGCAAACTGATGCCAGCCAGGATAATTTTTCTGGAACATCTTTCTTTGGTGCAGGC…
VFG000425(gb|NP_458732) (vexC) Vi polysaccharide export ATP-binding protein VexC [Vi antigen (VF0101)] [Salmonella enterica subsp. enterica serovar Typhi str. CT18]	GTGTTCGGTTTATTAGGTTGTACACGCTATTTTGAGTCTGATAAGGGCCCGCGGGTGGTCCTTGATAAAACAGATTTTGTCATGGGCTACCATGAGCATATCGGTATTCTGGCGGCTCCTGGTTCAGGCAAAACGACGCTAACCAGGTTGCTGTGTGGCCTGGATGCTCCTGATGAGGGGGATTTTATTGGGCTACGGGGTGATGCGCTCCCACTGGGGGCAAACTCTTTTATTCTGCCAGGGTTAACCGGTGAGGAGAATGCGCGAATGATGGCAAGTCTATATGGCCTGGATGGCGATGAGTTTTCACATTTCTGTTATCAATTGACCCAGCTTGAACAGTGCTATACCGACAGGGTGAGTGAATATTCTGTCACGATGAAAACGCATCTGGCATTT…
VFG000426(gb|NP_458733) (vexB) Vi polysaccharide export inner-membrane protein (ABC-2 type transporter) VexB [Vi antigen (VF0101)] [Salmonella enterica subsp. enterica serovar Typhi str. CT18]	ATGAATATTTTGAAAAATAATTCTTATTATTTTATGAAACTCATTACCGTCTGTGAGTTAATTATTTTATTGATGTCACGCGATATCAAAACACGCTATAACGGTAATTTACTAAACTATATGATGGTGCTGGCCGTACCACTGGTATGGATATCCATTACCGTTATTTCTTTTCAATATTTAAATCGCTCGGTGCCAATATCCACTGACGATATCAGTTTTGTTATTGCAGGGATATTACCGTATCTGTTATTTCGTTATACCATTACCGCAACCATGCGAACCCATTCATTCTCTACATCGTTAGCGGTTGTCTCGCAGGTTAAGAAAAGACATGTGATTTTTTCTCTTGCCGCAATCGAATTTGTTAATGCAGTTATCATTTATATTATTATTTCA…
VFG000427(gb|NP_458734) (vexA) Vi polysaccharide export protein VexA [Vi antigen (VF0101)] [Salmonella enterica subsp. enterica serovar Typhi str. CT18]	ATGAAAAAAATCATCATATTACTAACGACATTTTTCCTGCTTTCGGGATGCACTATTCCCAGGGCGGTATTTAAATCCAGCCTTATTAATCAGGACGATCCTCGTTATAATCTGGTCGAAGTCACGCCGACATTAAAACTAAGCGCTCCCGATACTGTGCCGAAAACTATTGTCGATCCGGTTTTTGCCGCAAATAACTGGCACTGGACATCTTTGGCTAAAGGCGATGTGCTGCATATCACTATTTTATCCTCGGGCGGGGCTGGATATTTATCCAATAACGCGAGCGGCGACCGTGCGGATTTTGAAAATATTCTTGTGACTGACAGTAATACCGTTCAGGTGCCTTATGCCGGGACAATCCCGGTTTCTGGATTGGATGTGACGCAACTGGCTGAT…
VFG000428(gb|NP_458735) (tviE) Vi polysaccharide biosynthesis protein TviE, Glycosyl transferases group 1 [Vi antigen (VF0101)] [Salmonella enterica subsp. enterica serovar Typhi str. CT18]	ATGATTACGCAGGAAGAAAAGTTAGCTGCACTAGGAAAAACGTGTTTAACATTAAAACAAGAGAAGAAGCTTGCGCAAGCTGTTGCGTTAATTGACAGTGAATTACCGACTGAGGCTTTAACTTCATTAGCGATGCTAAAAAAAGCAGAGTTTCTTCATGATGTCAATGAAACGGAGCGTGCATACGCGCTCTACGAAACGCTGATTGCACAAAACAATGATGAAGCACGTTATGAGTATGCACGTCGTTTATATAATACGGGGCTAGCCAAAGATGCTCAGCTAATTCTTAAAAAGGTTAGCAATGGTGTGCAGAAAAAATATAACAATTATTTAGGCAAAATAAATAAGATCTGTGATTTGCTTGAACGCCTTGAAGGGAAAGCGATCCCTGTGGGG…
VFG000429(gb|NP_458738) (tviD) Vi polysaccharide biosynthesis protein TviD [Vi antigen (VF0101)] [Salmonella enterica subsp. enterica serovar Typhi str. CT18]	ATGAATTTAATGAAATCGTCAGGGATGTTTACGCTTACAGCCATTGGCAGTTGCCGTATTGTGAGTCCGGTAAAACGAGCTCAGCCTTATTTTAATTTTCAGGCAAACTTTAAGAGAATATATGGTTTTACGCATACGAGCAGCGAGGCATTACAGCAGATTCGGTTTATTTTGGGCTTGATAGACATTCCTGAAAAGGTCCGACCATTTATTTTTAGACCTAATGTAAACTATTCAAACACCGACGTACATAGTCGTTCTGATTTCTATATCATTGAGATTTCAAGTCAGAAGAAGATTATGGCCTATGGGTTCTGCTTACAAATAAATTATTTAACTCGTCATTTCTATGAATTTTTTAGCCAAACAGAGCGGGCGTGCATGTACTGGTCGTTGGCC…
VFG000430(gb|NP_458739) (tviC) Vi polysaccharide biosynthesis protein, epimerase TviC [Vi antigen (VF0101)] [Salmonella enterica subsp. enterica serovar Typhi str. CT18]	ATGACGGCTTACGAAGAACTACGGACCAAACTGGTTCTGGCACCAAAGCGCTGGCTGATCACTGGCGTAGCAGGCTTTATTGGCTCCGGCTTATTAGAAGAATTACTCTTTCTCAACCAGACTGTCATTGGACTGGATAACTTTTCCACCGGTTATCAGCATAATCTAGACGACGTTCGCACGTCCGTCAGTGAGGAGCAATGGTCGCGATTTATTTTTATTCAGGGTGACATCAGGAAATTTACTGACTGTCAGAAAGCGTGTAAGAACGTTGACTATGTTCTCCACCAAGCCGCGCTAGGAAGCGTGCCACGTTCCCTAAAGGATCCCATCGCGACTAATAGCGCCAATATTGATGGTTTTTTAAATATGTTGACGGCGGCGAGAGATGCTCATGTC…
VFG000431(gb|NP_458740) (tviB) Vi polysaccharide biosynthesis protein, UDP-glucose/GDP-mannose dehydrogenase TviB [Vi antigen (VF0101)] [Salmonella enterica subsp. enterica serovar Typhi str. CT18]	GTGTTCGGTATAGACGAGGTAAAAATCGCGATTATTGGGCTGGGATATGTTGGGCTTCCTCTGGCAGTTGAATTTGGCAAATCTCGTCAGGTTGTTGGCTTCGACGTTAATAAAAAGCGTATTCTTGAATTAAAGAATGGGGTGGATGTCAATCTGGAAACCACTGAAGAAGAATTACGTGAGGCTCGTTATCTGAAATTTACTTCCGAGATTGAGAAGATCAAAGAATGTAATTTTTACATCATCACCGTCCCGACGCCGATAAATACCTACAAGCAACCAGACCTCACCCCACTAATCAAGGCGAGTGAAACCGTTGGTACAGTGCTGAATCGGGGAGATATTGTGGTATATGAATCTACGGTATATCCGGGATGTACCGAAGAAGAATGCGTGCCG…
VFG000445(gb|NP_459540) (fimC) chaperone protein FimC [Type 1 fimbriae (VF0102)] [Salmonella enterica subsp. enterica serovar Typhimurium str. LT2]	ATGCTGAATAGTATAAAAGTAGGCTTTATTGTTCTTCTCACGTTATTTACTTCGCTGAACGTACAGGCGGCGGGGGGGATTGCATTAGGCGCCACGCGCGTTATTTATCCCTCGGCGGCGAAGCAGACTTCTCTGGCAATCAGTAATAGCGATACTCAAGAACGTTACCTCGTCAATTCATGGATCGAAAATAACGCTGGGCAGAAAGAAAAAACGTTTATCGTTACGCCGCCTTTATTCGTCAGCGAGCCCAAAAGTGAAAACACGCTGCGTATTATCTACGCCGGGCAACCGCTACCCGGGGATCGGGAGTCGTTATTCTGGATGAACGTGAAAGCCATCCCGTCGGTCGATAAAAGTCATATTGAAGGAAAAAACGTTCTGCAACTGGCGATTCTG…
VFG000446(gb|NP_459541) (fimD) usher protein FimD [Type 1 fimbriae (VF0102)] [Salmonella enterica subsp. enterica serovar Typhimurium str. LT2]	ATGAAGAAGACAACCTGGTTTGCAGGGCGATTTCCCGGCTATGTATCACCGTTAAGCAGCGTGGCGCTGTCGGTGCTGGCGGCGCTGTGTCCGCTGACGAGCCGCGGCGAAAGTTATTTCAACCCTGCGTTTTTGTCGGCGGATACCGCGTCCGTGGCGGATTTATCTCGCTTTGAAAAAGGTAATCATCAGCCTCCCGGTATTTACCGGGTGGATATCTGGCGTAACGACGAATTCGTAGCGACGCAGGATATTCGTTTTGAGGCGGGCGCCGTGGGCACCGGCGATAAATCCGGCGGCCTGATGCCTTGTTTTACACCGGAGTGGATTAAACGGCTGGGCGTGAATACCGCGGCGTTCCCTGTCTCAGATAAAGGCGTCGATACCACGTGTATTCAC…
VFG000447(gb|NP_459542) (fimH) type I fimbriae minor fimbrial subunit FimH, adhesin [Type 1 fimbriae (VF0102)] [Salmonella enterica subsp. enterica serovar Typhimurium str. LT2]	ATGAAAATATACTCAGCGCTATTGCTGGCGGGGACCGCGCTCTTTTTCACCCATCCCGCGCTGGCGACGGTTTGCCGTAATTCAAACGGGACGGCGACCGATATCTTTTACGACCTGTCAGATGTTTTCACCAGCGGCAATAATCAGCCGGGACAGGTGGTGACGCTGCCGGAAAAATCAGGTTGGGTCGGCGTAAACGCGACGTGCCCGGCGGGGACAACGGTGAATTATACCTACCGAAGCTATGTATCAGAATTACCGGTACAAAGTACCGAAGGAAATTTTAAATACCTCAAGTTGAATGACTACCTTCTGGGCGCGATGAGCATCACCGATAGTGTCGCTGGCGTATTTTATCCGCCCCGTAACTATATTCTCATGGGCGTCGACTATAACGTG…
VFG000448(gb|NP_459543) (fimF) type I fimbriae adaptor protein FimF [Type 1 fimbriae (VF0102)] [Salmonella enterica subsp. enterica serovar Typhimurium str. LT2]	ATGATCCTTCGGCGCGTTTTCATCGCTATCGGTTGTGTTTTGTTCAGCCCGCTGAGTCAGGCCAACTCATCTCTGGGCGAAGTGAATATTGAACTGCGCGGTAACGTGGTGGATTTTACCTGCGCCGTGGTGGCGGGCGACAGTAACAAGTCGGTTAACCTCGGCACCTGGCCGACAAAACAGCTTCACGCCGCCGGTGACGCTACGCAACCGGTAGCCTTTAGCCTAAAACTTGAAGGTTGCCCGCCGGGGTCGGCGTCTATAACGTTTTCCGGGACGCCAGCGCCCGGCACGGCATTACTGGCGCTTGCTGATACGGCAATGGCGCAAAAACTGGCGATTGAAATTCGCGATGGCGATCAACGTCGATTGCCACTTGAACAGGCCAGCAAGGCCGTC…
VFG000457(gb|NP_460114) (csgB) minor curlin subunit precursor, curli nucleator protein CsgB [Agf (VF0103)] [Salmonella enterica subsp. enterica serovar Typhimurium str. LT2]	ATGAAAAACAAATTGTTATTTATGATGTTGACAATACTGGGTGCGCCTGGGATTGCAACCGCGACAAATTATGATCTGGCTCGTTCAGAGTATAATTTTGCGGTAAATGAATTAAGCAAGTCTTCATTTAATCAGGCGGCCATTATTGGTCAAGTCGGCACGGATAATAGTGCCAGAGTACGCCAGGAAGGATCAAAACTATTGTCCGTTATTTCACAAGAAGGAGGAAATAATCGGGCGAAAGTCGACCAGGCAGGGAATTATAACTTTGCGTATATTGAGCAAACGGGCAATGCCAACGATGCCAGTATATCGCAAAGCGCTTACGGTAATAGTGCGGCTATTATCCAGAAAGGTTCTGGAAATAAGGCCAATATTACCCAGTACGGTACGCAGAAA…
VFG000458(gb|NP_460115) (csgA) curlin major subunit CsgA [Agf (VF0103)] [Salmonella enterica subsp. enterica serovar Typhimurium str. LT2]	ATGAAACTTTTAAAAGTGGCAGCATTCGCAGCAATCGTAGTTTCTGGCAGTGCTCTGGCTGGCGTCGTTCCACAATGGGGCGGCGGCGGTAATCATAACGGCGGCGGCAATAGTTCCGGCCCGGATTCCACGTTGAGCATTTATCAGTACGGTTCCGCTAACGCTGCGCTTGCTCTGCAAAGCGATGCCCGTAAATCTGAAACGACCATTACCCAGAGCGGTTATGGTAACGGCGCCGATGTAGGCCAGGGTGCGGATAACAGTACTATTGAACTGACTCAGAATGGTTTCAGAAACAATGCCACCATCGACCAGTGGAACGCTAAAAACTCCGATATTACTGTCGGTCAATACGGCGGTAATAACGCCGCGCTGGTTAATCAGACCGCATCTGATTCC…
VFG000460(gb|NP_460112) (csgE) curli production assembly/transport protein CsgE [Agf (VF0103)] [Salmonella enterica subsp. enterica serovar Typhimurium str. LT2]	ATGAAACGCTATCTGACCTGGATTGTAGCAGCAGAGTTACTGTTCGCTACCGGAAACCTGCATGCCAATGAAGTTGAAGTCGAGGTTCCCGGATTGTTAACCGACCATACCGTCTCTTCGATAGGACATGAATTCTATCGTGCATTCAGCGACAAATGGGAAAGCGAATACACCGGCAATCTGACCATTAATGAAAGACCCAGTGCGCGTTGGGGAAGCTGGATCACCATAACGGTAAATCAGGACGTTATTTTCCAGACCTTTTTATTTCCAATGAAAAGAGACTTCGAGAAAACCGTCGTCTTCGCATTAGCGCAAACAGAGGAAGCATTAAATCGCCGACAAATAGATCAAACGCTATTAAGTACGAGTGATTTAGCGCGTGATGAATTCTAA
VFG000461(gb|NP_460111) (csgF) curli production assembly/transport protein CsgF [Agf (VF0103)] [Salmonella enterica subsp. enterica serovar Typhimurium str. LT2]	ATGCGTGTTAAACATGCAGTAGTGCTGCTCATGCTTTTTTCGCCATTAACCTGGGCTGGAAATATGACGTTCCAGTTCCGTAATCCTAACTTTGGTGGAAACCCCAATAACGGTTCCTTTTTATTGAATAGCGCCCAGGCGCAAAATTCATATAAAGACCCCGCTTATGATAACGATTTTGGTATCGAAACCCCCTCAGCGTTGGATAACTTTACGCAGGCTATTCAATCGCAAATTCTGGGCGGCTTGTTGACCAATATTAATACCGGGAAACCAGGACGTATGGTGACCAACGATTTTATTATCGATATCGCTAATCGCGACGGACAGCTCCAGCTCAACGTCACGGACAGAAAAACGGGAAGAACCTCGACCATCGAAGTGTCAGGTTTACAAACT…
VFG000462(gb|NP_460110) (csgG) curli production assembly/transport protein CsgG [Agf (VF0103)] [Salmonella enterica subsp. enterica serovar Typhimurium str. LT2]	ATGCCGCGCTTACTTATTTTGGTTGCCGTTTTATTGTTGAGCGGATGCTTAACTGCCCCGCCGAAACAAGCTGCGAAACCGACATTAATGCCCCGCGCACAAAGTTACAAAGATTTGACGCACTTACCTGCTCCCACCGGTAAGATCTTTGTTTCGGTATATAACATTCAGGATGAAACGGGCCAATTTAAACCTTACCCGGCAAGTAACTTTTCTACGGCTGTGCCGCAGAGCGCCACCGCTATGTTGGTCACTGCGCTGAAAGATTCGCGCTGGTTTATCCCGCTGGAACGACAAGGCTTACAGAATCTTTTGAATGAACGGAAAATTATTCGCGCAGCCCAGGAAAACGGCACCGTGGCGATGAATAACCGTATCCCGCTTCAGTCGCTGACGGCG…
VFG000557(gb|NP_461817) (invA) type III secretion system major export apparatus protein InvA [TTSS(SPI-1 encode) (VF0116)] [Salmonella enterica subsp. enterica serovar Typhimurium str. LT2]	GTGCTGCTTTCTCTACTTAACAGTGCTCGTTTACGACCTGAATTACTGATTCTGGTACTAATGGTGATGATCATTTCTATGTTCGTCATTCCATTACCTACCTATCTGGTTGATTTCCTGATCGCACTGAATATCGTACTGGCGATATTGGTGTTTATGGGGTCGTTCTACATTGACAGAATCCTCAGTTTTTCAACGTTTCCTGCGGTACTGTTAATTACCACGCTCTTTCGTCTGGCATTATCGATCAGTACCAGTCGTCTTATCTTGATTGAAGCCGATGCCGGTGAAATTATCGCCACGTTCGGGCAATTCGTTATTGGCGATAGCCTGGCGGTGGGTTTTGTTGTCTTCTCTATTGTCACCGTGGTCCAGTTTATCGTTATTACCAAAGGTTCA…
VFG000574(gb|NP_462662) (mgtB) Mg2+ transport protein [MgtBC (VF0106)] [Salmonella enterica subsp. enterica serovar Typhimurium str. LT2]	ATGACTGACATGAACATTGAAAACCGGAAACTCAATCGCCCGGCGTCAGAAAATGATAAGCAGCATAAAAAAGTATTTCCGATCGAAGCGGAAGCTTTTCATAGCCCGGAGGAGACACTGGCGCGGCTGAACAGCCATCGTCAGGGCCTCACGATAGAAGAGGCCAGCGAACGGTTGAAAGTGTATGGGCGCAATGAAGTGGCGCATGAGCAAGTTCCTCCGGCGCTGATTCAGCTTCTGCAGGCATTCAATAACCCGTTTATTTACGTTCTGATGGCATTGGCAGGGGTTAGTTTCATCACGGATTACTGGCTCCCGTTACGCCGTGGCGAAGAGACCGATCTCACTGGTGTGCTGATTATTCTGACGATGGTCAGTTTGAGCGGGTTATTGCGTTTC…
VFG000616(gb|NP_709455) (iucB) aerobactin synthesis protein IucB [Aerobactin (VF0123)] [Shigella flexneri 2a str. 301]	ATGTCTGAGGCAAACATTATTCACAGCAGATATGGACTGCGCTGTGAAAAACTCGACAAGCCCCTGAATCTTGGCTGGGGACTGGACAATAGCGCGGTGTTGCACTGTCCCGGGGAGCTGCCGACAGGGTGGCTGTGCGATGCGCTGGATCAGATATTTATCGCCGCACCACAACTGTCAGCAGTGGCTCTCCCCTGGGCCGAATGGCGTGAGGAGCCACAGGCGCTGACGCTTTTTGGGCAGGTAAAAAGCGACATTATCCATCGTACTGCCTTCTGGCAGTTACCGTTATGGTTGAGTTCACCGGCAAACCGGGCCTCCGGTGAAATGGTTTTTGATGCAGAGCGTGAGATTTATTTCCCGCAGCGCCCACCCCGTCCACAGGGTGAGGTTTACCGC…
VFG000618(gb|NP_709457) (iucD) aerobactin synthesis protein IucC, lysine 6-monooxygenase [Aerobactin (VF0123)] [Shigella flexneri 2a str. 301]	ATGAAAAAAAGTGTCGATTTTATTGGTGTCGGGACAGGGCCATTTAATCTCAGCATTGCTGCATTGTCACATCAGATCGAAGAACTGAACTGTCTCTTCTTTGACGAACATCCTCATTTTTCCTGGCATCCGGGTATGCTGGTACCGGATTGTCATATGCAGACCGTCTTTCTGAAAGATCTGGTCAGTGCAGTTGCACCTACAAATCCCTACAGCTTTGTTAACTATCTGGTGAAGCACAAAAAGTTCTATCGCTTCCTTACAAGCAGGCTACGTACAGTATCCCGTGAAGAGTTTTCTGACTATCTCCGCTGGGCTGCTGAAGATATGAATAACCTGTATTTCAGTCATACCGTTGAAAATATTGATTTCGACAAAAAAAGTCGATTGTTTCTGGTT…
VFG000635(gb|NP_708747) (pic) serine protease, autotransporter Pic [Pic (VF0120)] [Shigella flexneri 2a str. 301]	ATGCAGGACGATTTCGATGCCCCCGTAGACTTTGTTTCCGGACTGGGCCCCCTGAACTGGACATACGACAAAACATCAGGCACAGGTACCCTGAGCCAGGGCAGTAAAAACTGGACCATGCACGGGCAGAAAGACAATGACCTCAATGCCGGTAAAAATCTGGTATTCAGCGGGCAGAATGGTGCAATTATCCTGAAAGACAGTGTGACTCAGGGTGCCGGTTATCTCGAATTTAAAGACAGTTACACCGTATCTGCTGAATCCGGAAAAACATGGACGGGTGCCGGCATTATTACTGACAAGGGGACGAATGTAACCTGGAAGGTCAACGGCGTTGCCGGTGACAACTTGCATAAGCTGGGGGAAGGAACCCTGACCATAAACGGAACAGGTGTAAAC…
VFG000669(gb|NP_706257) (gtrA) bactoprenol-linked glucose translocase/flippase [LPS (VF0124)] [Shigella flexneri 2a str. 301]	ATGTTAAAGTTATTTGTAAAGTACACATCTATAGGTGTGCTGAACACACTTATACACTGGGTGGTTTTTGGTGTATGTATCTATGCCGCACATACCAGTCAGGCTCTGGCAAACTTCACAGGTTTCGTAGTGGCTGTGAGCTTTAGCTTCTTCGCGAATGCAAGATTCACATTCAAAGCATTGACTACAGCGATGCGCTACATGTTATACGTGGGATTTATGGGAATATTGAGTGTGATTGTTGGTTGGGCAGCTGATAAATGCTCACTTCCTCCAATAGTCACTCTTATCACCTTCTCCGCCATCAGTCTGGTGTGCGGTTTCGTCTATTCAAAGTTCATTGTCTTTAGGGATGCGAAATGA
VFG000670(gb|NP_706258) (gtrB) bactoprenol glucosyl transferase [LPS (VF0124)] [Shigella flexneri 2a str. 301]	ATGAAAATATCTCTTGTCGTTCCTGTCTTCAATGAAGAAGAAGCGATACCTGTTTTCTATAAAACGGTACGTGAATTCCAAGAGTTGAAGCCATATGAAGTAGAAATTGTATTCATAAATGACGGAAGTAAAGATGCCACAGAGTCAATTATTAACGCGCTGGCTGTTTCAGACCCGCTAGTTGTTCCGCTGTCATTTACACGCAACTTTGGTAAAGAACCAGCCTTATTTGCAGGGTTAGACCATGCAAGCGGCGATGCTGTAATTCCTATTGATGTCGACCTGCAAGACCCAATTGAGGTTATCCCTCATCTTATTGAAAAGTGGCAGGCAGGTGCTGACATGGTGCTTGCTAAACGTTCAGACCGCTCAACTGATGGACGACTGAAACGTAAGACA…
VFG000739(gb|AAC38392) (eae) intimin [Intimin (VF0177)] [Escherichia coli O127:H6 str. E2348/69]	ATGATTACTCATGGTTTTTATGCCCGGACCCGGCACAAGCATAAGCTAAAAAAAACATTTATTATGCTTAGTGCTGGTTTAGGATTGTTTTTTTATGTTAATCAGAATTCATTTGCAAATGGTGAAAATTATTTTAAATTGGGTTCGGATTCAAAACTGTTAACTCATAATAGCTATCAGAATCGCCTTTTTTATACGTTGAAAACAGGTGAAACTGTTGCCGATCTTTCTAAATCGCAAGATATTAATTTATCGACGATTTGGTCGTTGAATAAGCATTTATACAGTTCTGAAAGCGAAATGATGAAGGCCGAGCCTGGTCAGCAGATCATTTTGCCACTCAAAAAACTTCCCTTTGAATACAGTGCCTTACCACTTTTAGGTTCGGCACCTCTTGTT…
VFG000743(gb|AAC38395) (espD) EspD [EspD (VF0180)] [Escherichia coli O127:H6 str. E2348/69]	ATGCTTAATGTAAATAACGATATCCAGTCTGTGAGGTCTGGAGCCAGTGCTGCTACGGCTACTTCAGGTATTAATCAGTCTGAAGTGACTTCCGCGCTGGATTTACAACTGGTTAAATCCACGGCCCCATCAGCAAGTTGGACAGAAAGTACCGCTTTAGCAACGCCACCGGCAGGTCACTCATTAGTGACGCCCTCTGCTGCTGAGGATGTCCTGAGTAAGCTGTTTGGTGGTATTAGTGGTGAAGTTACGAGTCGAACAGAGGGAACAGAACCACAGCGCAGCACTCAGAATGCAAGCTCTGGCTATCCTTATCTTTCTCAGGTGAATAACGTTGACCCTCAGGCCATGATGATGATGGCCACTCTGTTATCCCTGGATGCCTCAGCGCAGAGAGTT…
VFG000744(gb|AAC38396) (espB) EspB [EspB (VF0179)] [Escherichia coli O127:H6 str. E2348/69]	ATGAATACTATCGATAATAACAATGCGGCAATCGCAGTTAATTCTGTTTTGAGCAGCACGACTGACAGCACCAGTTCAACAACTACATCAACTTCGTCAATCAGTTCATCTTTACTTACTGATGGCAGAGTGGATATTTCTAAACTTCTGCTGGAGGTTCAAAAACTGTTGCGTGAGATGGTCACCACATTGCAAGATTATCTTCAGAAGCAATTGGCGCAAAGCTATGACATCCAAAAAGCCGTTTTTGAGAGCCAAAATAAAGCTATTGATGAGAAAAAAGCCGGTGCGACAGCCGCTCTGATTGGTGGTGCTATCTCATCTGTCCTGGGGATTTTAGGCTCTTTTGCTGCCATTAATAGCGCAACTAAAGGCGCGAGTGATGTCGCTCAGCAAGCC…
VFG000748(gb|AAC38400) (espF) EspF [EspF (VF0182)] [Escherichia coli O127:H6 str. E2348/69]	ATGCTTAATGGAATTAGTAACGCTGCTTCTACACTAGGGCGGCAGCTTGTAGGTATCGCAAGTCGAGTGAGCTCTGCGGGGGGAACTGGATTTTCTGTAGCCCCTCAGGCTGTTCGTCTTACTCCGGTGAGAGTTCATTCCCCCTTTTCTCCAGGTTCGTCGAATGTTAATGCGAGGACGATTTTTAATGTGAGCAGCCAGGTGACTTCATTTACTCCCTCTCGTCCGGCACCGCCGCCACCGACAAGTGGACAGGCATCCGGGGCATCCCGACCTTTACCGCCCATTGCACAGGCACTAAAAGATCATTTAGCTGCCTATGAACTATCGAAAGCGTCTGAGACTGTAAACTTTAAGCCAACCCGTCCGGCACCGCCGCCACCGACAAGTGGACAGGCA…
VFG000794(gb|NP_290250) (espF) Type III secretion system effector EspF [EspF (VF0196)] [Escherichia coli O157:H7 str. EDL933]	ATGCTTAATGGAATTAGTAACGCTGCTTCTACACTAGGGCGGCAGCTTGTAGGTATCGCAAGTCGAGTGAGCTCTGCGGGGGGAACTGGATTTTCTGTAGCCCCTCAGGCCGTGCGTCTTACTCCGGTGAAAGTTCATTCCCCTTTTTCTCCAGGCTCGTCGAATGTTAATGCGAGAACGATTTTTAATGTGAGCAGCCAGGTGACTTCATTTACTCCCTCTCGTCCGGCACCGCCGCCACCGACAAGTGGACAGGCATCCGGGGCATCCCGACCTTTACCGCCCATTGCACAGGCATTAAAAGAGCACTTGGCTGCCTATGAAAAATCGAAAGGTCCTGAGGCTTTAGGTTTTAAGCCCGCCCGTCAGGCACCGCCGCCACCGACAAGTGGACAGGCA…
VFG000795(gb|NP_290251) (escG) chaperone for EscF [LEE encoded T3SS (SS020)] [Escherichia coli O157:H7 str. EDL933]	ATGGTTAATGATATTTCTGCTAATAAGATACTGGTGTGGGCGGCTGTAGCTGCGGCAAACCATAAGCTTCCCAAATATGCGGAAGCTATCCTGAATGTATTCCCACAAATTATACCTGATAAAAAAGATATCGCACATTTAGAATTTATTATCTTATTTGGATTAAATAGAAAAAATGATGCGGTAAAGGCTTTGGAGGACTGTATGGATGATGAGACGAGTCAGTTATTGTACAGTTTGGTCCATGAGAATGGTAGTGGCTGGGTACGAGGATTTTAA
VFG000796(gb|NP_290252) (escF) Type III secretion system needle filament protein EscF [TTSS (VF0191)] [Escherichia coli O157:H7 str. EDL933]	ATGAATTTATCTGAAATTACTCAACAAATGGGTGAAGTAGGTAAAACGCTGAGCGATTCTGTGCCAGAGTTACTTAATAGCACCGATTTGGTTAATGACCCTGAAAAAATGTTAGAGTTGCAGTTTGCGGTTCAGCAATATTCTGCTTATGTTAACGTAGAAAGTGGAATGTTGAAAACGATAAAAGATCTGGTCTCAACCATTTCTAACCGTAGTTTTTAA
VFG000797(gb|NP_290253) (cesD2) chaperone for EspD [LEE encoded T3SS (SS020)] [Escherichia coli O157:H7 str. EDL933]	ATGGTCGATACGTTTAATGATGAAGTGTTTAATTACTATCTTGAACAAAAAGGGTACACAATACAGAAGGAGTTTCTTTGTGGCAGTGCCTTTTTTATCGGATGGCGGATTGAGACACCTTTTTTTTCATTAGCGTACAGACTGGATGAACAAGAACTGATTTTGTGCTCTTTTGAAGCACGTAACCAAACAGGGCTTAACGGCCCTGTTTTATCGCTGACTCATTTGCTCGAAGAGTTGTATCACCATTTTTCGGGTATTAAGAAAATCAGCGCGATGAAATCTAAGATTGGTTCAGATTCAGAACGTCAAAAGCGCGAAGAGTTGTTTAATTACTTCATCAGAAAGGGTGCCGTGCAGCAAGAAACAGAAGACGGAATTTGGTTCGTAATGAACGTA…
VFG000799(gb|NP_290255) (espD) Type III secretion system translocator protein EspD, pore protein [EspD (VF0200)] [Escherichia coli O157:H7 str. EDL933]	ATGCTTAACGTAAATAACGATACCCTGTCTGTAACGTCTGGGGTTAATACCGCCTCGGGTACTTCTGGTATTACTCAATCTGAAACGGGTTTATCGCTGGATTTACAACTGGTTAAATCCATGAACTCGTCAGCAGGCTGGACAGAAAGTAGCCCTTTACCGACGCCGCCGGCAGGTCACTCATTAGTGACGCCCTCTGCTGCTGAGGATGTCCTTAGTAAATTGTTTGGTGGTATTAGTGGTGAGGTTACAAGTCGCACTGAGGAGGCAGAGCCACAGCGCACAAGCTATCCCTATCTCTCTCAGGTGAATACCGTTGACCCTCAGCAAATGATGATGATGGTCACTCTGTTATCCCTGGATACTTCCGCGCAGAAAGTCTCGAGTCTGAAAAACTCT…
VFG000800(gb|NP_290256) (espA) Type III secretion system translocator protein EspA [EspA (VF0198)] [Escherichia coli O157:H7 str. EDL933]	ATGGATACATCAAATGCAACATCCGTTGTTAATGTGAGTGCGAGTTCTTCGACATCGACGATCTATGACTTAGGTAATATGTCGAAGGATGAGGTGGTTAAGCTATTTGAGGAACTCGGTGTTTTTCAGGCTGCGATTCTCATGTTTTCTTATATGTATCAGGCACAAAGTAATCTGTCGATTGCAAAGTTTGCTGATATGAATGAGGCATCTAAAGCGTCAACCACGGCACAAAAGATGGCTAATCTTGTGGATGCCAAAATTGCTGATGTTCAGAGTAGCACTGATAAGAATGCGAAAGCCAAACTTCCTCAAGACGTGATTGACTATATAAACGATCCACGTAATGACATAAGTGTAACTGGTATTCGTGATCTTAGTGGTGATTTAAGCGCTGGT…
VFG000801(gb|NP_290257) (sepL) Type III secretion system secretion gatekeeper SepL [TTSS (VF0191)] [Escherichia coli O157:H7 str. EDL933]	ATGGCTAATGGTATTGAATTTAATCAAAACCCCGCATCTGTTTTTAATTCTAATTCATTAGATTTTGAATTAGAATCTCAGCAATTAACGCAAAAAAATTCTTCTAATATTTCTTCGCCATTAATAAATTTGCAAAATGAATTAGCAATGATTACTAGTTCATCGCTTTCTGAAACGATTGAAGGGCTAAGCCTGGGATATCGCAAAGGTAGCGCAAGGAAAGAAGAGGAAGGCTCGACAATCGAGAAGCTGCTCAATGATATGCAAGAGCTGCTTACTCTTACCGATAGTGATAAAATAAAAGAACTATCATTAAAAAACAGCGGGCTGCTGGAACAACACGATCCTACTTTGGCGATGTTTGGCAACATGCCAAAGGGGGAAATTGTTGCGCTAATA…
VFG000802(gb|NP_290258) (escD) Type III secretion system outer MS ring protein EscD [TTSS (VF0191)] [Escherichia coli O157:H7 str. EDL933]	ATGTTATCCTCATATAAAATAAAACTTCTCAATGGTGCGATGCGTAATCGGGAATTACAACTTCCGATGGGAAACCTAACGCTAGGTACGGAAGATAACGATATTGTTTACTTTCCCCTTGAACAAGGCCTCAATCAGTTTTTACTTGATATACGTGAGGAAGGTGTTTTCCTTTTATCTCCGGTTGAATTTTGGATTGATGGGCAACCCACGCCCTATGAAGCAGATAAACCATTACCTGTCGGAAAGGTTATTGATATAGCGGGATGTTGCTTCATCATTGGTGATATTGACCATTCCTTGCCATTGTCTGATGTGCCAGAAAGGTTCTCTGCCAAAAGTCGACGCAAAAAACGCCTTATCCTGGCGAGCGTGATTGGTGCTACTTTTGCGTTGTCT…
VFG000804(gb|NP_290260) (cesT) multieffector chaperone [LEE encoded T3SS (SS020)] [Escherichia coli O157:H7 str. EDL933]	ATGTCATCAAGATCTGAACTTTTATTAGAAAAATTTGCAGAAAAAATTGGTATTGGATCTATTTCATTTAATGAAAACAGATTGTGTTCTTTTGCTATTGATGAAATTTATTATATTTCGTTATCTGATGCCAATGACGAATATATGATGATTTATGGTGTCTGTGGGAAATTCCCGACAGATAACTCTAACTTCGCTCTTGAGATTTTGAATGCAAACTTATGGTTTGCAGAGAATGGTGGGCCATATCTGTGCTATGAGGCTGGAGCACAATCGCTGTTGTTAGCGTTACGTTTCCCTCTCGATGATGCTACCCCTGAAAAACTCGAGAATGAAATAGAAGTCGTTGTTAAGTCAATGGAAAACCTGTATTTGGTATTACATAATCAGGGAATAACA…
VFG000805(gb|NP_290261) (tir) translocated intimin receptor protein [Tir (VF0193)] [Escherichia coli O157:H7 str. EDL933]	ATGCCTATTGGTAATCTTGGTCATAATCCCAATGTGAATAATTCAATTCCTCCTGCACCTCCATTACCTTCACAAACCGACGGTGCAGGGGGGCGTGGTCAGCTCATTAACTCTACGGGGCCGTTGGGATCTCGTGCGCTATTTACGCCTGTAAGGAATTCTATGGCTGATTCTGGCGACAATCGTGCCAGTGATGTTCCTGGACTTCCTGTAAATCCGATGCGCCTGGCGGCGTCTGAGATAACACTGAATGATGGATTTGAAGTTCTTCATGATCATGGTCCGCTCGATACTCTTAACAGGCAGATTGGCTCTTCGGTATTTCGAGTTGAAACTCAGGAAGATGGTAAACATATTGCTGTCGGTCAGAGGAATGGTGTTGAGACCTCTGTTGTTTTA…
VFG000806(gb|NP_290262) (map) Type III secretion system effector Map, Rho guanine exchange factor [Map (VF0195)] [Escherichia coli O157:H7 str. EDL933]	ATGTTTAGTCCAATGACAATGGCAGGCAGATCGTTAGTTCAGGCGACTGCACAGACGCTTAAACCTGCGGTTACCAGAGCTGCAATGCAAGCGGGTACGGGAGCCACGGGTATGAGGTTCATGCCCGTGCAGTCGAACTTTGTGATTAATCATGGCAAACTGACTAACCAACTCCTGCAGGCTGTAGCCAAACAAACTCGTAATGGCGATACCCAACAATGGTTCCAGCAGGAGCAGACGACTTATATATCCAGAACAGTAAATAGAACTCTGGATGACTATTGCAGGAGTAATAATTCGGTCATTAGTAAGGAGACTAAAGGTCACATTTTTAGAGCTGTTGAAAATGCGTTACAGCAACCTCTTGATATGAACGGGGCACAATCATCAATTGGTCAC…
VFG000807(gb|NP_290263) (cesF) CesF, chaperone for EspF [TTSS (VF0191)] [Escherichia coli O157:H7 str. EDL933]	ATGAATGAGAAATTTCGCACAGACCTTGCACATACGTTTGGGATAGCTCTTGAAGAGCAAACTGACGTGCTCTCTTTCCACGATAACGATGGCCATGAATGGATACTGGAGTGTGCATCTCAATCTGAAATTCTGTTTTTTTATTGTTATTTATTGAATAGCGAATCAATACAGATTAATTCAATACTTGAAATGAATAGCAATCGAGAACTGCTCGGTATGTTTTTCCTGTCATTAAAAGATGACAACATTCTTTTAAATATTGCATTTCCTGCAGATAAAATTGATATTACAGAGTTTGCTAATTTAATGGAAAATGGTTATCTATTAAAGAATGAGATAATTAGATCCTTGTCTTCCAGACCTACAGATTTTTTACCTTGA
VFG000808(gb|NP_290264) (espH) Type III secretion system effector EspH, RhoGEF Inhibitor [EspH (VF0197)] [Escherichia coli O157:H7 str. EDL933]	ATGTCGTTATCAGGAGCGGTATTCAAGACATTTCTGACAAGTGAACATGCGTCATGGAACAGGTTCAACAGAAGGCTTCATATACCCAATGAAGATATCGTAGATGAAATTCAGCTTAAAGCCCGAATGCAACAACGCCATCATCGGGTATATCCAGAAATAGGGGATTCCACCATTGTCTCTTTTAGAGGCAAAGACTATGCTGTTCACTTTATTAAAGATGGCCCAAAAGATGATTATGTGTACAAAGTACAAAGAATAACACCGGAAAATGGATGTTTCTCAACGCTATTTAGCGTGTTTTCTGGCGGTGTGACTAAGGCTTTGGAAAGAAAATTAAATGAGAGACATATAACTCCACTTTCTTCAACCTGGTTTCCTCGTACTCCCCTGGAGGGG…
VFG000809(gb|NP_290265) (sepQ/escQ) Type III secetion system C ring protein EscQ [TTSS (VF0191)] [Escherichia coli O157:H7 str. EDL933]	ATGAAGCCATTGAGTTCACAATTGAATATGAAAATTAACGATTTTTATTTGCCGTTGTTGCCAGTTATCGGAACCGGTCGCCTCTATATTACGTCCAAAGGTCATGCTTGCCATGCATATTTTCGTGAGGTCAGCGGTCATGGTATTCGTTTCACGTTGACATACTCGGGCTATGAGGGGCGTTTCTGGATATCAGAAGAACAGTTCATTCAGTGGTGCCAAGAGTTATTCCCGTATAGCGAAAGCCGGCTGATACCGGAAGATACGATAAAACTCATGATCTTATGGGTAATGCAGACTGCCTTACCGGAAGGTGATGTGTCAGTTGATGATGTTCAATTTACGATGCTAAATAAAGATATTTATCCGGTAATAGAAAATAATAATGGAGAAAACAGA…
VFG000810(gb|NP_290266) (escP) Type III secretion system needle length regulator EscP [LEE encoded T3SS (SS020)] [Escherichia coli O157:H7 str. EDL933]	ATGGCTTCTTTATGGAAGAGATTGTTTTACTCCTCGGGCCGAAGACGACGCTACTTTGAAGAAGGGGAGCACTCGTTTAGTATTCTTTGTGGAAGATTACGAGGAATTGTTTTAACAATTAAATGTAGTAACGGAATCATTTATCTGTCTATTAAAGTAAGCCCAAATAATAGAAATCATGTTTTTTTATATCATAAAAAAGACTATGTTTTCGATAAGTTAAAAGAAATCTTTCCTGATGAAGCCATTGAGTTCACAATTGAATATGAAAATTAA
VFG000811(gb|NP_290267) (escO) positive regulator EscO [LEE encoded T3SS (SS020)] [Escherichia coli O157:H7 str. EDL933]	ATGTTGGACAGAATTTTATCTATTCGTAAAAGCAGAGCGAACCGATTGAGAGAATCAATGGCTAAGATTAACTCTCAGATAAAAGAGGTGGATGGTAAACTCGATGACTGCGAGCAATCCATTAAAGAGTCGATTGCCTCTAAGCAGGCATATTGTGCATCGCTGGTGAATTTGGATAAAGTGTCGTTGTATAAATATCAGATTAAAAACAATGCATTTGATGAGCAAAAGCAGCGATTGTATGAGAAAAAATCTTCACTTTCGAAGGAAAAGCGTTCATTGCTAGATTCACAAAAACGAACAAAAGAGAATCTGCAACATGTTAATAAATCAGTAGAAAAATTATCTTTTGCCATAAAGGAACATTACTTTGACTAG
VFG000812(gb|NP_290268) (escN) ATPase EscN [TTSS (VF0191)] [Escherichia coli O157:H7 str. EDL933]	ATGATTTCAGAGCATGATTCTGTATTGGAAAAATACCCACGTATTCAGAAAGTGCTCAATAGCACTGTGCCGGCATTATCATTAAATTCGTCTACCAGATATGAAGGCAAGATTATCAATATCGGCGGGACGATTATTAAGGCGCGTTTACCAAAAGCGCGTATTGGCGCCTTTTATAAGATAGAACCCAGTCAACGTTTAGCCGAGGTGATCGCTATTGATGAAGATGAGGTTTTCTTGTTGCCTTTTGAGCATGTTTCCGGCATGTACTGTGGTCAGTGGTTAAGTTATCAGGGAGATGAGTTCAAGATTCGTGTTGGAGACGCACTACTTGGGCGGCTTGTTGATGGCATAGGCAGACCAATGGAGAGTAATATTGCTGCCCCCTATCTTCCGTTT…
VFG000813(gb|NP_290269) (escV) Type III secretion system major export apparatus protein [TTSS (VF0191)] [Escherichia coli O157:H7 str. EDL933]	ATGAATAAACTCTTAAATATATTTAAAAAAGCAGAGTCATATCACGATCTTATTCTGGCTCTCTTCTTCTTTATGGCTGTAATGATGATGATTATTCCACTACCAACAGTTGTGGTGGATATCATTATCGCGATTAATATTTCGACAGCTTTACTTTTATTAATGCTCTCAATCTATATAAAAAATCCTCTTGAACTAACTTCTTTCCCCACAATCCTGTTGATTACGACGTTGATGCGCCTGTCGCTCAGTGTTAGTACAACCAGACTTATTCTGCTGCATCACGATGCGGGTGACATTATTTACTCCTTCGGTAACTTTGTTGTTGGCGGTAATATTGTTGTTGGCCTGGTTATTTTTACTATTATCACCATTGTTCAATTTATGGTTATTACAAAA…
VFG000814(gb|NP_290270) (cesL) chaperone for SepL [LEE encoded T3SS (SS020)] [Escherichia coli O157:H7 str. EDL933]	ATGAATCTTTTAGTTAAAAGAAACGTTGAAGAGTTTTTAAGATTATTGGGAAATGATTTTTATTTATTTGATAACCGTGTTGAAATTGATTTTAATGGGTTTTCTTTTTTTATTGAAATAATTGATAATAATGTTTTTGTTACGTTTGCTTTAGAGTATAACGAAAACGCATTTTTCTCTTTCTTTAGTGCCCTTGCTCCTGAGCGTACGCAGGGAGTGATTGAACATATTTTTGTCTACGATAATAAATTGTGCTTAAGTTGTTTGTTAACCAATATCGATGTTTTTTTTCTAATGAATACTTTTCAACAGCATGTGCAGATTATTGAGCGCGTTCGCAGGATGACATCATGA
VFG000815(gb|NP_290271) (sepZ/espZ) Type III secretion system effector EspZ [TTSS (VF0191)] [Escherichia coli O157:H7 str. EDL933]	ATGGAAGCAGCAAATTTAAGTCCTTCTGGTGCAGTAATGCCGCTGGCGACCTCACTCAGTGGAAATAACTCAGTGGATGAGAAGACAGGAGTGATTAAACCAGAAAATGGAACAAATCGCACCGTTAGAGTTATAGCCGGATTAGCACTTACCACTACGGCTCTGGCAGCTCTAGGTACAGGTATTGCAGCGGCATGCTCGGAGACGAGCAGCACAGAATACTTAGCCCTGGGTATTACTTCTGGCGTACTAGGTACTCTTACTGCGGTTGGCGGTGCATTAGCGATGAAATATGCCTAA
VFG000816(gb|NP_290272) (escI) Type III secretion system inner rod component EscI [LEE encoded T3SS (SS020)] [Escherichia coli O157:H7 str. EDL933]	ATGGATGTATTATGCCCTTGCCTCTTTCATAAAAAGAGGCTAACAGTAAATATGAACAACATTAATCAATCGGAAAACATTAATATTCAATTAAATAAAGCGCCCCAAACAAATTTCGTTGATGAGCATACCTCGTTAGCCTCAGCCCCCTCTGCGGCAGGTGCGGCTCAGTTTCTTGATCAATTACTCCCTAAAACAGCGGGAGTGTCTTCTCCAGAACAAGTGTTGATTGAAGAAATTAAAAAGAGACATCTTGCAACAATGAACAGCGATCTCAGTTTCGATGCTCTATCTGCAGGTGGGCTCTCGCCAGAAGACGTGCTCACCTTACAAAAGAATGTGCTCAACGCAAACGTCAACGTTGATGTCGTATCTAAGTTAGCAAGCCTCCTTTCAACA…
VFG000817(gb|NP_290273) (escJ) Type III secretion system inner MS ring protein EscJ [TTSS (VF0191)] [Escherichia coli O157:H7 str. EDL933]	ATGAAAAAACACATTAAAAACCTTTTTTTATTGGCTGCTATTTGTTTGACAGTGGCATGTAAAGAGCAATTGTATACAGGATTAACAGAAAAAGAAGCTAATCAGATGCAAGCACTGTTGCTATCCAATGATGTCAATGTTTCCAAAGAAATGGACAAAAGTGGAAATATGACACTCAGTGTGGAAAAAGAGGATTTTGTTCGCGCAATAACGATTTTAAATAATAACGGCTTCCCGAAAAAGAAATTTGCAGATATCGAGGTTATTTTCCCACCTAGCCAGTTAGTGGCATCGCCATCACAAGAAAATGCAAAAATCAACTATCTCAAAGAACAAGACATCGAAAGGTTGCTAAGTAAAATACCTGGTGTTATCGATTGCAGCGTTTCATTAAATGTT…
VFG000818(gb|NP_290274) (sepD) Type III secretion system secretion switch protein SepD [LEE encoded T3SS (SS020)] [Escherichia coli O157:H7 str. EDL933]	ATGAACAATAATAATGGCATAGCAAAGAATGATTGTGACTGGCTAACGGCCCTTGATTTTGTAAAGGATGTCAACGGTTCACCAACGCATCTCACTTTTTATATCTACCAAAAAAATGCTTTCTTGCACGATTTTGGAAACTACTGGGTTCTATATATTGAGCTTAGTGGTGATTTTCGTCAGGTTCCAACAGATACATTTATCAGACTCTGCAATATCCTGGCCGTTAGTAACGAATATAAACAAATGGGTATTTTCCTGTCTAATAAGAAGTGGTATCTTTGCCAAATTTTTCATAAAGATAATAATCATCGCGCAAACATGTCAAAAGCAATAATGCAACATACTCTCGCCTCTTTGCTCGATAAGCAATTTGATAAACTAGAGCAATTATCTTCA…
VFG000819(gb|NP_290275) (escC) Type III secretion system secretin EscC [TTSS (VF0191)] [Escherichia coli O157:H7 str. EDL933]	ATGAAAAAAATAAGTTTTTTTATTTTTACAGCACTATTTTGCTGCAGTGCACAAGCTGCCCCGTCCTCTCTGGAAAAAAGATTAGGCAAGAGCGAATATTTTATTATTACTAAAAGTTCTCCAGTACGTGCAATCCTTAATGACTTTGCTGCTAACTACAGCATTCCTGTTTTCATCAGTAGTTCCGTGAATGATGATTTCTCTGGCGAAATAAAAAATGAAAAACCTGTAAAAGTACTGGAAAAACTGTCCAAACTATATCATCTCACATGGTATTATGATGAGAACATCTTGTATATTTATAAAACAAATGAAATATCAAGAAGTATAATTACACCAACATATCTGGATATTGACTCACTGCTAAAATATCTGAGTGATACAATCTCAGTAAACAAA…
VFG000820(gb|NP_290276) (cesD) chaperone for EspB and EspD [TTSS (VF0191)] [Escherichia coli O157:H7 str. EDL933]	ATGAGCAGGAAATTTAGCTCTCTAGAGGATATTTATGATTTCTACCAGGATGGTGGCACATTAGCGTCATTAACAAATCTGACACAACAAGATCTCAATGACCTTCATTCTTATGCCTATACAGCATATCAATCTGGTGATGTTATAACCGCAAGAAATCTATTCCATTTGCTCACATATCTGGAACACTGGAATTATGACTACACCTTATCTCTGGGCTTATGTCATCAGCGTTTATCAAATCATGAAGATGCACAACTGTGTTTCGCACGCTGTGCAACTTTAGTTATGCAAGATCCCAGGGCATCTTATTATTCTGGAATTAGCTACTTACTCGTCGGAAATAAGAAAATGGCCAAGAAAGCCTTTAAGGCTTGTTTAATGTGGTGTAATGAAAAA…
VFG000823(gb|NP_290279) (etgA) T3SS-associated peptidoglycan lytic enzyme [LEE encoded T3SS (SS020)] [Escherichia coli O157:H7 str. EDL933]	ATGAAAAAAATAATACTGAGCATCATTCTCATTTCAAATTACTGTTATGCTTCCGATTGTTTTGAAATTACAGGAAAAGCATATAACATAGATCCATTAATATTAAAAGCAATTGCATGGAATGAATCAAAATGCAAAAGCGGAATAAAAAGCAAAACAAACAAAAACGGAACGTATGATATAGGTATAATGCAAATTAATTCATCTCATTTAGATTTATTAAGCAAATTTAATATATCTGAAGATGATTTATTGAATGATGCCTGTATAAACATATCTGTTGCTGGTTATATCTTAGCCTCTAACATAAAATCCAGAGGGAATACATGGGATGCAGTTGGTGCGTATAATGCAGGTTACTTTAATACACCAAATGCAGTAGAACTCAGAAGGCAATAC…
VFG000824(gb|NP_290280) (escU) Type III secretion system export apparatus switch protein EscU [TTSS (VF0191)] [Escherichia coli O157:H7 str. EDL933]	ATGAGTGAAAAAACAGAAAAGCCCACACCCAAAAAACTAAGGGATCTAAAAAAGAAGGGCGATGTAACAAAAAGTGAAGAGGTAATGGCTGCAGTGCAGTCATTAATCTTATTTTCATTTTTTTCTTTATATGGCATGAGTTTTTTTGTTGATATAGTTGGATTAGTTAATACGACAATAGACTCGCTAAATAGACCGTTTTTGTATGCCATTCGAGAAATATTAGGTGCGGTATTAAATATATTTTTATTATATATTTTGCCAATTTCTTTGATTGTCTTTGTTGGAACTGTTACGACTGGTGTATCACAAATAGGATTCATCTTTGCGGTTGAAAAAATAAAACCATCGGCTCAGAAGATTAGTGTAAAAAATAACCTGAAAAATATTTTTTCTGTA…
VFG000825(gb|NP_290281) (escT) Type III secretion system minor export apparatus protein EscT [TTSS (VF0191)] [Escherichia coli O157:H7 str. EDL933]	ATGAATGAGATAATGACGGTCATAGTATCATCATTTTATTGTATACTCAGGCCGCTGGGGATGTTTATTATCCTACCAATATTTTCAACAGGTGTTTTACTCAGTAACTTTATTCGCAACTCAATTATGATTGCGTTTACGCTTCCGATCATAGTAGAGAACTATACATTTTCGGAAAAATTGCCATCTGGAATCTTTCAGTTGACAGGAATAGCGCTAAAAGAAATAAGTATTGGTTTTTTCATTGGGTTATCATTTACTATTCTTTTTTGGGCAATAGATGCGGCTGGACAGATTATTGATACTCTAAGAGGCTCAACAATATCTTCAATTTTTAACCCGTCCATAAGTGATTCATCTTCTATCACTGGCGTTATCTTGTACCAATTTATCTCTGTG…
VFG000826(gb|NP_290282) (escS) Type III secretion systemminor export apparatus protein EscS [TTSS (VF0191)] [Escherichia coli O157:H7 str. EDL933]	ATGGATACTGGATATTTTGTTCAATTATGTGTGCAAACGTTCTGGATAATATTTATCCTCTCATTGCCTACAGTCATAGCGGCCTCTGTTATCGGTATTATTATTAGTCTGGTCCAGGCTATAACGCAGTTACAGGATCAAACATTGCCTTTTTTGCTAAAAATAATAGCAGTGTTTGCTACGCTTGCCCTGACTTATCACTGGATGGGAACAACAATCATCAACTTCTCGTCGATAATATTTGAAATGATTCCGAAGGTGAACGGCTAA
VFG000827(gb|NP_290283) (escR) Type III secretion systemminor export apparatus protein EscR [TTSS (VF0191)] [Escherichia coli O157:H7 str. EDL933]	ATGTCTCAATTAATGACCATTGGCTCACAGCCAATATTTTTAATTATTGTATTTTTTCTGTTATCATTACTGCCAATATTTGTTGTTATTGGTACTTCATTCCTGAAAATTTCTATTGTACTGGGGATATTGAAGAACGCATTAGGCATTCAACAGGTACCACCAAACATGGCGCTAACATCAGTGTCTTTGATACTGACAATGTTTATTATGTCTCCGATAATATTACAGATAAATGATAATATTTCTCAGGAACCAATCAATTATACCGACTCTGATTTTTTTCAAAAAGTTGATGAGAAAATATTATCACCATATCGCGGTTTTTTAGAAAAAAATACAGAGAAAGACAATGTAGAGTTTTTTGAACGTGCAGCTCAAAAAAAATTGGGTAATGAA…
VFG000828(gb|NP_290284) (escL) negative regulator EscL, stator protein [LEE encoded T3SS (SS020)] [Escherichia coli O157:H7 str. EDL933]	GTGCTTACAGAAGATATCATACCAGAGGATAAGTTACAGGAAATTATTCAATCTGATGATATTATCAAACTGGCTCGAAAAAAAACATATGAACATTTACTGAGGGCGAGGAGGAAATCGAAAGAATTAAAGACAGAATCCAGAAAAAAAATTGCCAGAAAAATGATTCTAATGAGAGAAAGGATTCGAAAAAATAATAAAATAAAATTAGATAAAGAGGTTAACCAATCGATAAAATGGGTTAAAGATATCCAGGCTATCGAGTTGGTCTTAATGCAGGACATAATGAATAAGATTCATTTGTCACTGACTAATGCATTACATTCTTTAGATACATCATCAAGAATTAATTGGGATGATTTACTTAATGAAGTTGTAAGGGAAACTCTATCTAATAAC…
VFG000830(gb|NP_290286) (cesAB) chaperone for EspA and EspB [LEE encoded T3SS (SS020)] [Escherichia coli O157:H7 str. EDL933]	ATGAGTATTGTGAGCCAAACAAGAAATAAAGAACTATTAGATAAAAAAATAAGATCAGAAATTGAGGCGATAAAAAAAATAATCGCCGAATTTGATGTCGTAAAAGAAAGCGTTAATGAGTTAAGTGAAAAAGCAAAAACAGATCCTCAGGCGGCAGAAAAATTAAACAAATTAATTGAGGGGTACACATATGGTGAAGAGCGAAAATTATATGATTCTGCCCTAAGTAAGATTGAAAAACTAATAGAGACACTGAGTCCAGCAAGATCTAAAAGCCAATCAACAATGAATCAACGGAATAGAAATAATAGAAAAATAGTATGA
VFG000831(gb|NP_290287) (escE) chaperone for EscF [LEE encoded T3SS (SS020)] [Escherichia coli O157:H7 str. EDL933]	ATGATAACGATAACTGAGCTGGAAGATGAAATAATAAAAAATAAAGAAGCCGCAAATGTTTTTATTGAAAAAATAAACGACAAAAAGAACGAAATCCATGAAAAAATGAAACACCCTTTGGATAAAGTTACCTACAATGAAGCAAAGGAACTGCTCATTGCGTGTGATGCGGCAATTAGGACTATAGAGATAATGCGAATCAGGATTAATAATAAATAG
VFG000833(gb|NP_290289) (espG) Type III secretion system effector EspG, GTPase activating protein [EspG (VF0201)] [Escherichia coli O157:H7 str. EDL933]	ATGATACTTGTTGCCAAATTGTTCATTACAAACCAGATAGGAGAATCTCTCATGATAAATGGACTTAATAATGACTCCGCATCTTTAGTTTTAGATGCTGCAATGAAAGTTAATTCTGGGTTTAAAAAAAGCTGGGATGAGATGTCATGCGCTGAAAAGTTATTTAAAGTACTTAGTTTTGGTTTATGGAATCCAACGTACAGTCGTAGTGAAAGACAATCATTTCAAGAGTTGTTAACCGTTTTAGAGCCTGTATATCCACTTCCCAATGAATTAGGCAGAGTATCTGCTCGTTTTTCAGATGGTTCATCCTTAAGAATTTCCGTCACTAACAGCGAACTTGTTGAAGCCGAGATTCGCACAGCAAATAATGAAAAGATTACTGTGCTCCTGGAGTCA…
VFG000835(gb|NP_288673) (stx1A) shiga-like toxin 1 subunit A encoded within prophage CP-933V [Stx (VF0206)] [Escherichia coli O157:H7 str. EDL933]	ATGAAAATAATTATTTTTAGAGTGCTAACTTTTTTCTTTGTTATCTTTTCAGTTAATGTGGTTGCGAAGGAATTTACCTTAGACTTCTCGACTGCAAAGACGTATGTAGATTCGCTGAATGTCATTCGCTCTGCAATAGGTACTCCATTACAGACTATTTCATCAGGAGGTACGTCTTTACTGATGATTGATAGTGGCACAGGGGATAATTTGTTTGCAGTTGATGTCAGAGGGATAGATCCAGAGGAAGGGCGGTTTAATAATCTACGGCTTATTGTTGAACGAAATAATTTATATGTGACAGGATTTGTTAACAGGACAAATAATGTTTTTTATCGCTTTGCTGATTTTTCACATGTTACCTTTCCAGGTACAACAGCGGTTACATTGTCTGGTGAC…
VFG000837(gb|NP_286976) (stx2A) shiga-like toxin II A subunit encoded by bacteriophage BP-933W [Stx (VF0206)] [Escherichia coli O157:H7 str. EDL933]	ATGAAGTGTATATTATTTAAATGGGTACTGTGCCTGTTACTGGGTTTTTCTTCGGTATCCTATTCCCGGGAGTTTACGATAGACTTTTCGACCCAACAAAGTTATGTCTCTTCGTTAAATAGTATACGGACAGAGATATCGACCCCTCTTGAACATATATCTCAGGGGACCACATCGGTGTCTGTTATTAACCACACCCCACCGGGCAGTTATTTTGCTGTGGATATACGAGGGCTTGATGTCTATCAGGCGCGTTTTGACCATCTTCGTCTGATTATTGAGCAAAATAATTTATATGTGGCCGGGTTCGTTAATACGGCAACAAATACTTTCTACCGTTTTTCAGATTTTACACATATATCAGTGCCCGGTGTGACAACGGTTTCCATGACAACGGAC…
VFG000838(gb|NP_286977) (stx2B) shiga-like toxin II B subunit encoded by bacteriophage BP-933W [Stx (VF0206)] [Escherichia coli O157:H7 str. EDL933]	ATGAAGAAGATGTTTATGGCGGTTTTATTTGCATTAGCTTCTGTTAATGCAATGGCGGCGGATTGTGCTAAAGGTAAAATTGAGTTTTCCAAGTATAATGAGGATGACACATTTACAGTGAAGGTTGACGGGAAAGAATACTGGACCAGTCGCTGGAATCTGCAACCGTTACTGCAAAGTGCTCAGTTGACAGGAATGACTGTCACAATCAAATCCAGTACCTGTGAATCAGGCTCCGGATTTGCTGAAGTGCAGTTTAATAATGACTGA
VFG000839(gb|NP_287515) (paa) outer membrane adhesin Paa [Paa (VF0194)] [Escherichia coli O157:H7 str. EDL933]	ATGAGGAACATAATGGCAGGTTTTTTAATATTCCTGTCTTCTGCTGCTTATGCTGATATCAATCTGTATGGTCCTGGTGGCCCGCATACAGCCTTGCTTGATGCAGCCAAACTTTATGCCGAAAAAACAGGTATTATAGTGAACGTTCATTACGGCCCACAGAACAAATGGAATGAAGATGCCAAAAAAAATGCAGATATCTTGTTTGGCGCATCAGAACAATCTGCTCTGGCTATCATTCGGGACCATAAAGACAGCTTCAGTGAAAAAGATATTCAGCCTCTTTATCTGCGAAAAAGTATTTTACTGGTAAAGAAAGGTAATCCTAAAAATATCCGGAGTATTGACGACCTGACCAGACCTGGGATTGGCGTAATTGTTAATGATGGTGGTGGTACC…
VFG000840(gb|YP_325608) (hlyA) hemolysin toxin protein [Hemolysin (VF0207)] [Escherichia coli O157:H7 str. EDL933]	ATGACAGTAAATAAAATAAAGAACATTTTCAATAATGCGACATTGACTACAAAATCAGCATTTAATACAGCATCATCAAGCGTACGTTCCGCTGGAAAAAAACTCATATTATTAATACCTGATAATTATGAAGCTCAGGGCGTGGGTATTAATGAGTTGGTCAAAGCTGCTGATGAGCTTGGAATAGAAATACACCGTACTGAACGAGATGATACAGCGATTGCAAACCAGTTTTTTGGTGCAGCAGAAAAAGTTGTAGGATTAACTGAACGTGGTGTTGCAATATTCGCACCACAACTTGACAAACTTCTGCAGAAGTATCAGAAAGTTGGGAGTAAAATAGGAGGAACCGCTGAAAATGTAGGTAATAATCTGGGAAAAGCCGGAACAGTTCTCTCA…
VFG000841(gb|YP_325609) (hlyB) hemolysin transport protein [Hemolysin (VF0207)] [Escherichia coli O157:H7 str. EDL933]	ATGATGAGTAAATGTAGTTCTCATAATAGTCTGTATGCACTGATATTGCTTGCACAATATCATAATATAACTGTCAATGCTGAAACTATAAGGCATCAGTATAATACCCACACACAAGATTTTGGGGTGACTGAATGGTTACTGGCAGCGAAATCTATTGGCTTAAAAGCAAAATATGTAGAAAAACATTTTTCCAGATTGTCAATAATTTCTTTACCTGCGTTGATATGGCGGGATGACGGTAAGCATTATATATTGTCTCGTATTACTAAAGATTCATCACGCTATCTTGTTTATGATCCAGAACAACATCAGTCACTAACTTTTAGTCGGGATGAGTTTGAAAAACTGTATCAGGGAAAAGTCATTCTGGTTACGTCAAGAGCAACAGTAGTCGGA…
VFG000842(gb|YP_325607) (hlyC) hemolysin transport protein [Hemolysin (VF0207)] [Escherichia coli O157:H7 str. EDL933]	ATGAAATCTAATGCTTTTGACGTCATGGGGAAGGTTGCATGGCTATGGGCCTGTTCTCCTCTGCATAAAAAATGGCCATTATCTGTTTTTGCTATTAATGTCATACCTGCTATTCAGACAAATCAATTTGCTCTCTTAATAAAGGATGAGCTTCCTGTAGCTTTTTGTAGCTGGGCCAGTTTAGATCTGGAATGTGAGGTAAAATATATAAATGATGTAACATCTTTGTATGCAAAAGACTGGATGTCGGGAGAAAGAAAGTGGTTTATTGACTGGATAGCTCCATTTGGACACAACATGGAGTTATATAAATACATGAGGAAAAAGTATCCTTATGAGTTATTCAGAGCAATAAGGTTAGATGAGAGCAGTAAAACAGGAAAAATAGCTGAATTTCAT…
VFG000843(gb|YP_325610) (hlyD) hemolysin transport protein [Hemolysin (VF0207)] [Escherichia coli O157:H7 str. EDL933]	ATGCGCTTTTACATGAAAGGTTTATGGGATTTGGTTTGCCGTTATAAGACGGTTTTTTCTGATGTCTGGAAAATTCGTCACACACTTGATGCTCCTGTGAGAGAAAAAGATGAGTATGCATTTCTTCCTGCTCACCTTGAACTCATTGAAACACCAGTATCCAGACGTTCTCATTTTGTTGTATGGAGTATTTTATTATTTGTAATTATATCTCTTCTCTTATCTGTTCTTGGGAAAGTTGAAGTGGTTTCAGTAGCAAATGGTAAGTTTACTCATAGTGGAAGAAGCAAAGAAATAAAACCGATAGAGAATGCGATTGTAGAAAAAATAATGGTAAAAGATGGCTCTTTTGTAAAAAAAAATGATCCATTAGTTGAATTGACGGTGCCTGGTGTTGAA…
VFG000844(gb|YP_325580) (espP) autotransporter, serine protease [EspP (VF0208)] [Escherichia coli O157:H7 str. EDL933]	ATGAATAAAATATACTCTCTTAAATACAGCCATATTACAGGAGGGTTAATCGCTGTTTCTGAATTATCCGGCAGAGTATCATCAAGAGCAACTGGTAAGAAAAAACACAAACGCATACTTGCATTATGTTTTTTAGGCTTATTACAATCCTCATATTCTTTTGCGTCACAGATGGATATTTCAAATTTCTACATCCGTGACTATATGGATTTTGCACAGAACAAGGGCATATTTCAGGCTGGCGCAACAAATATTGAAATAGTGAAGAAAGATGGCTCCACCCTGAAACTACCGGAAGTACCATTTCCTGACTTCTCACCGGTTGCAAACAAAGGGTCAACCACATCTATTGGTGGTGCATACAGTATCACAGCCACACACAATACGAAAAACCACCAC…
VFG000845(gb|YP_325655) (toxB) cytotoxin [ToxB (VF0203)] [Escherichia coli O157:H7 str. EDL933]	ATGATTCATCCTGGCTCTTCTTTAGATAAAGCAATTAACAATACAAGAGTTAAAAATGTTAGTACTGATGTTAAACATGGCCAAATTCAAGAGAGAAAAAGGAACTTTATCTATAAAAAAAATGATGATATCTCATCCAGATTTAAACTTTACAGTTCGCTCGTAAAGCAGAAAAATGCGACAGAAGATGTTGTTTTAATAGGCAAAATGATTTTAGATGAAGTTAGAAGTTACAGAACTATACATAATGATCGAAATATCGTAAGTAACTCAGGAAACTGGAAAACATCTTTTTTATGTAATCTTGCTAGACTACTATATAGCATATTTAATGGTAGTAACTATTTTTGTTCCCGAGAGGGTGAAAATAATTCATCCCCCAGTTCTACTCTACTTACT…
VFG000846(gb|YP_325591) (stcE) metalloprotease [StcE (VF0209)] [Escherichia coli O157:H7 str. EDL933]	ATGAACACTAAAATGAATGAGAGATGGAGAACACCGATGAAATTAAAGTATCTGTCATGTACGATCCTTGCCCCTCTGGCGATTGGGGTATTTTCTGCAACAGCTGCTGATAATAATTCAGCCATTTATTTCAATACCTCCCAGCCTATAAATGATCTGCAGGGTTCGTTGGCCGCAGAGGTGAAATTTGCACAAAGCCAGATTTTACCCGCCCATCCTAAAGAAGGGGATAGTCAACCACATCTGACCAGCCTGCGGAAAAGTCTGCTGCTTGTCCGTCCGGTGAAAGCTGATGATAAAACACCTGTTCAGGTGGAAGCCCGCGATGATAATAATAAAATTCTCGGTACGTTAACCCTTTATCCTCCTTCATCACTACCGGATACAATCTACCATCTG…
VFG000863(gb|BAA94855) (astA) heat-stable enterotoxin 1 [EAST1 (VF0216)] [Escherichia coli O44:H18 042]	ATGCCATCAACACAGTATATCCGAAGGCCCGCATCCAGTTATGCATCGTGCATATGGTGCGCAACAGCCTGCGCTTCGTGTCATGGAAGGACTACAAAGCCGTCACTCGCGACCTGA
VFG000871(gb|NP_757239) (fimB) Type 1 fimbriae Regulatory protein fimB [Type 1 fimbriae (VF0221)] [Escherichia coli CFT073]	ATGAAGAATAAGGCTGATAACAAAAAAAGGAACTTCCTGACCCATAGTGAAATCGAATCACTCCTTAAAGCTGCAAATACCGGGCCTCATGCTGCACGTAATTATTGTCTGACATTACTTTGTTTTATTCATGGTTTCCGGGCGAGTGAAATTTGCCGATTGAGGATTTCGGATATTGATCTTAAGGCAAAGTGTATATATATCCATCGATTAAAAAAAGGCTTTTCAACAACGCACCCGCTATTGAACAAAGAAATTCAGGCTTTAAAAAACTGGTTGAGTATCCGTACTTCTTATCCGCATGCTGAGAGCGAGTGGGTATTTTTATCACGTAAGGGGAATCCACTTTCTCGGCAACAGTTTTACCATATTATCTCGACTTCCGGTGGTAATGCCGGG…
VFG000872(gb|NP_757240) (fimE) Type 1 fimbriae Regulatory protein fimE [Type 1 fimbriae (VF0221)] [Escherichia coli CFT073]	GTGAGTAAACGTCGTTATCTTACCGGTAAAGAAGTTCAGGCCATGATGCAGGCGGTGTGTTACGGGGCAACGGGAGCCAGAGATTATTGTCTTATTCTGTTGGCATATCGGCATGGGATGCGTATTAGTGAACTGCTTGATCTGCATTATCAGGATCTTGACCTTAATGAAGGTCGAATAAATATTCGCCGACTGAAGAACGGATTTTCTACCGTTCACCCGTTACGTTTTGATGAGCGTGAAGCCGTGGAACGCTGGACCCAGGAACGTGCTAACTGGAAAGGCGCTGACCGGACCGACGCTATATTTATTTCTCGCCGCGGGAGTCGGCTTTCTCGCCAGCAGGCCTATCGCATTATTCGCGATGCCGGTATTGAAGCTGGAACCGTAACGCAGACT…
VFG000873(gb|NP_757241) (fimA) Type-1 fimbrial protein, A chain precursor [Type 1 fimbriae (VF0221)] [Escherichia coli CFT073]	GTGTACAGAACGACTGCCCATGTCGATTTAGAAATAGTTTTTTTAAAGGAAAGCAGCATGAAAATTAAAACTCTGGCAATCGTTGTTCTGTCGGCTCTGTCCCTCAGTTCCACAGCGGCTCTGGCCGCTGCCACGACGGTTAATGGTGGGACCGTTCACTTTAAAGGGGAAGTTGTTAACGCCGCTTGCGCAGTTGATGCAGGCTCTGTTGATCAAACCGTTCAGTTAGGACAGGTTCGTACCGCATCGCTGGACCAGGATGGAGCGACCAGCTCTGCTGTCGGTTTTAACATTCAACTGAATGATTGCGATACCGATGTTGCAAGTAAAGCTGCTGTTGCCTTCTTAGGTACAACAATTGACACGAATCATACCAACGTACTGGCTCTGCAAAGTTCT…
VFG000874(gb|NP_757242) (fimI) Fimbrin-like protein fimI precursor [Type 1 fimbriae (VF0221)] [Escherichia coli CFT073]	ATGAAAAGGAAGAGATTATTTCTGTTAGCGTCGTTGCTGCCAATGTTTGCTCTGGCCGGAAATAAATGGAATACCACGCTGCCCGGCGGAAATATGCAATTTCAGGGCGTCATTATTGCGGAAGCTTGCCGGATTGAAGCCGGTGATAAACAAATGACGGTCAATATGGGGCAAATCAGCAGTAACCGGTTTCATGCGGTAGGGGAAGATAGCTCACCGGTGCCTTTTGTTATTTATTTACGGGAATGTAGCACGGTGGTGAGTGAACGTGTGGGTGTGGCGTTTCACGGTGTCGCGGATGGTAAAAATCCGGATGTGCTTTCCGTGGGAGAGGGGCCAGGGATAGCCACCAATATTGGCGTAGCGTTATTTGATGATGAAGGAAACCTCGTACCGATT…
VFG000875(gb|NP_757243) (fimC) Chaperone protein fimC precursor [Type 1 fimbriae (VF0221)] [Escherichia coli CFT073]	GTGAGTAATAAAAACGTCAATGTAAGGAAATCGCAGGAAATAACATTCTGCTTGCTGGCAGGTATCCTGATGTTCATGGCAATGGTGGTTGCCGGACGCGCTGAAGCGGGAGTGGCCTTAGGTGCGACCCGCGTAATTTATCCGGCAGGGCAAAAACAAGTGCAACTTGCCGTGACAAATAATGATGAAAATAGCACCTATTTAATTCAATCATGGGTGGAAAATGCCGATGGTGTTAAGGATGGTCGTTTTATCGTGACGCCACCTCTGTTTGCGATGAAGGGAAAAAAAGAGAATACCTTGCGTATTCTTGATGCAACAAATAACCAATTGCCACAGGATCGGGAAAGTTTATTCTGGATGAATGTTAAAGCGATTCCGTCAATGGATAAATCAAAA…
VFG000876(gb|NP_757244) (fimD) Outer membrane usher protein fimD precursor [Type 1 fimbriae (VF0221)] [Escherichia coli CFT073]	ATGTCATATCTGAATTTAAGACTTTACCAGCGAAACACACAGTGCTTGCATATTCGTAAGCATCGTTTGGCTGGTTTTTTTGTCCGGCTCTTTGTTGCCTGTGCTTTTGCCGCACAGGCACCTTTGTCATCTGCCGAACTCTATTTTAACCCGCGTTTTTTAGCGGATGATCCCCAGGCTGTGGCTGATTTATCGCGTTTTGAGAATGGGCAAGAATTACCGCCAGGGACGTATCGTGTCGATATCTATTTGAATAATGGTTATATGGCAACGCGTGATGTCACATTTAATACGGGCGACAGCGAACAAGGGATTGTTCCCTGCCTGACACGCGCGCAACTTGCCAGTATGGGGCTGAATACGGCTTCTGTCTCCGGTATGAATCTGCTGGCGGATGAT…
VFG000877(gb|NP_757245) (fimF) FimF protein precursor [Type 1 fimbriae (VF0221)] [Escherichia coli CFT073]	GTGATGAGAAACAAACCTTTTTATCTTCTTTGCGCTTTTTTGTGGCTGGCGGTAAGTCACGCTTTGGCTGCGGATAGCACGATTACTATCCGCGGCTATGTCAGAGATAATGGCTGTAGTGTGGCCGCTGAATCAACCAATTTTACTGTTGATCTGATGGAAAACGCGGCGAAGCAATTTAACAACATTGGTGCGACGACTCCTGTCGTTCCATTTCGTATTTTGCTGTCACCCTGTGGTAACGCTGTTTCTGCCGTAAAGGTTGGGTTTACTGGCGTTGCAGATAGCCACAATGCCAACCTGCTTGCACTTGAAAATACGGTGTCAGCGGCTGCGGGACTGGGAATACAGCTTCTGAATGAGCAGCAAAATGAGATACCCCTTAATGCCCCATCGTCC…
VFG000878(gb|NP_757247) (fimG) FimG protein precursor [Type 1 fimbriae (VF0221)] [Escherichia coli CFT073]	ATGAAATGGCGCAAACGTGGGTATTTATTGGCGGCAATGTTGGCGTTCGCAAGTGCGACGATACAGGCAGCCGATGTCACCATCACGGTTAACGGTAAGGTCGTCGCCAAACCGTGTACGGTTTCCACCACCAATGCCACGGTAGATCTCGGCGATCTTTATTCTTTCAGTCTGATGTCTGCCGGGGCGGCATCGGCCTGGCATGATGTTGCGCTTGAGTTGACTAATTGTCCGGTGGGAACGTCGAGGGTCACTGCCAGCTTCAGCGGGGCAGCCGACAGTACCGGATATTATAAAAATCAGGGGACCGCGCAAAACATCCAGTTAGAGCTACAGGATGACAGTGGCAACACATTGAATACTGGCGCAACCAAAACAGTTCAGGTGGATGATTCCTCA…
VFG000879(gb|NP_757248) (fimH) FimH protein precursor [Type 1 fimbriae (VF0221)] [Escherichia coli CFT073]	ATGATTGTAATGAAACGAGTTATTACCCTGTTTGCTGTACTGCTGATGGGCTGGTCGGTAAATGCCTGGTCATTCGCCTGTAAAACCGCCAATGGTACCGCAATCCCTATTGGCGGTGGCAGCGCCAATGTTTATGTAAACCTTGCGCCTGCCGTGAATGTGGGGCAAAACCTGGTCGTAGATCTTTCGACGCAAATCTTTTGCCATAACGATTACCCAGAAACCATTACAGACTATGTCACACTGCAACGAGGTTCGGCTTATGGCGGCGTGTTATCTAGTTTTTCCGGGACCGTAAAATATAATGGCAGTAGCTATCCTTTCCCTACTACCAGCGAAACGCCGCGGGTTGTTTATAATTCGAGAACGGATAAGCCGTGGCCGGTGGCGCTTTATTTG…
VFG000902(gb|NP_755494) (sat) Aecreted auto transpoter toxin [Sat (VF0231)] [Escherichia coli CFT073]	TTGAGAGAATATATGAATAAAATATACTCCCTTAAATATAGTGCTGCCACTGGCGGACTCATTGCTGTTTCTGAATTAGCGAAAAGAGTTTCTGGTAAAACAAACCGAAAACTTGTAGCAACAATGTTGTCTCTGGCTGTTGCCGGTACAGTAAATGCAGCAAATATTGATATATCAAATGTATGGGCGAGAGACTATCTTGATCTTGCACAAAATAAAGGTATTTTCCAGCCCGGAGCAACAGACGTAACAATCACTTTAAAAAACGGAGATAAATTCTCTTTCCATAATCTCTCAATTCCGGATTTTTCTGGTGCAGCAGCGAGTGGCGCAGCTACCGCAATAGGAGGTTCTTATAGTGTTACTGTTGCACATAACAAAAAGAACCCTCAGGCCGCA…
VFG000903(gb|NP_752289) (pic) serine protease precursor [Pic (VF0232)] [Escherichia coli CFT073]	GTGAATAAAGTTTATTCTCTTAAATATTGCCCTGTCACCGGGGGACTTATTGTTGTCTCTGAACTTGCCAGCAGGGTAATAAAAAAGACATGCCGAAGATTAACGCATATTCTTCTGGCTGGCATTCCAGCAGTCTATCTGTATTACCCTCAGATATCCCAGGCGGGCATTGTCCGTTCCGATATTGCCTATCAGATTTATCGTGATTTCGCTGAAAACAAAGGGCTTTTTGTACCTGGTGCCACAGATATTCCGGTATATGATAAGGACGGAAAACTTGTGGGGAGACTGGATAAAGCCCCAATGGCCGATTTCAGCAGTGTGAGCTCAAATGGCGTTGCTACGCTTGTATCACCTCAGTATATCGTCAGCGTAAAGCATAACGGAGGATATCAGAGT…
VFG000916(gb|NP_756169) (chuS) heme oxygenase ChuS [Chu (VF0227)] [Escherichia coli CFT073]	ATGAACCACTACACACGCTGGCTTGAGTTAAAAGAACAAAATCCCGGAAAGTACGCGCGTGACATCGCAGGTTTAATGAATATCAGCGAAGCAGAACTGGCATTTGCACGCGTCACGCACGACGCGTGGCGGATGCGCGGCGATATTCGTGAAATTCTGGCGGCGCTCGAAAGTGTTGGCGAGACCAAATGTATTTGCCGTAATGAATACGCAGTCCATGAACAAGTTGGTGCGTTCACAAACCAGCATTTGAACGGACATGCCGGATTGATCCTCAATCCGCGCGCGCTGGATTTACGTCTGTTTCTCAATCAATGGGCCAGTGTTTTCCACATCAAAGAAAACACGGCTCGTGGCGAACGCCAGAGTATTCAGTTCTTTGATCATCAGGGCGATGCA…
VFG000917(gb|NP_756170) (chuA) Outer membrane heme/hemoglobin receptor ChuA [Chu (VF0227)] [Escherichia coli CFT073]	TTGTTGGCTTTGGCTGTTTCTGCCACCTTGCCAACGTTTGCTTTTGCTACTGAAACCATGACCGTTACGGCAACGGGGAATGCACGTAGTTCCTTCGAAGCGCCTATGATGGTCAGCGTTATCGACACTTCCGCTCCTGAAAATCAAACTGCTACTTCAGCCACTGATTTGCTGCGTCATGTTCCTGGAATTACTCTTGATGGTACCGGACGAACCAACGGTCAGGATGTAAATATGCGTGGCTATGATCATCGCGGCGTGCTGGTTCTTGTCGATGGTGTTCGCCAGGGAACGGATACCGGACACCTGAATGGCACTTTTCTCGATCCGGCGCTGATCAAGCGTGTTGAGATTGTTCGCGGACCTTCAGCATTACTGTATGGCAGTGGCGCGCTGGGT…
VFG000918(gb|NP_756175) (chuT) periplasmic heme-binding protein ChuT [Chu (VF0227)] [Escherichia coli CFT073]	TTGAATCGACGGTTGTATTTCATATATAACTCAAATGATAATCATGATCATTCTCAATTTGATAAGAGTTCTCACATTATGCCAAGGATCATCACCAGGCCGTTTCTTTTTTCCCCACTAACGTTATGTATTTCAGCCGTGGTCTCTGCCGCGAAGACCATGGTAAAACGAAAAAAATTGTTTACGGCATTACTGGCTCTTAGCTGGACTTTTAGCGTAACGGCTGCCGAACGTATCGTGGTCGCAGGAGGATCGCTGACGGAGTTAATCTACGCGATGGGCGCTGGCAAACGCGTGGTTGGTGTCGATGAAACGACATCTTATCCACCAGAAACCGCCAAACTGCCGCATATTGGTTACTGGAAACAACTCAGCAGCGAAGGCATTTTGTCACTTCGC…
VFG000919(gb|NP_756176) (chuW) Putative oxygen independent coproporphyrinogen III oxidase [Chu (VF0227)] [Escherichia coli CFT073]	ATGAACACAAATAACACCCTGGATCTCACGCCACATTTTGCTTTAGACGGTGATCAGCCCTTTAAAGACAGGCGCGCCATGATGCCGTTTCGTGGGGCCATTCCGGTTGCCAAAGAGCAACTGGCACAGACCTGGCAAGAGATGATCAATCAAACGGTATCACCACGTAAGCGACTGGTTTACCTACACATTCCTTTTTGTGCGACACACTGCACGTTTTGTGGTTTTTATCAGAACCGTTTTAATGACGATGCGTGTGCTCATTATACCGACGCCCTGATTCGTGAAATAGAAATGGAAGCAGACAGCGTATTGCATCAGTCTGCCCCCATCCACGCGGTCTATTTCGGTGGCGGTACGCCTTCCGCGCTTTCAGCACACGATTTGGCCAGAATCATC…
VFG000922(gb|NP_756179) (chuU) heme permease protein ChuU [Chu (VF0227)] [Escherichia coli CFT073]	GTGCTCAAGGATTCACTCTCTTCCGCCAGGGTCTTTATGGGGCTATCACTATTATTGCTAGCTCTGGTGCTGTTTGGTGCCAGTCAGGGAGCGTTAAAGATCAGTTTTGATGCCCTTTTTGATGAGGAATACCGCGATATCTGGCTCAATATTCGTCTACCACGGGTTTTGCTGGCGGTGCTGGTAGGTGCAGCGTTGGCAACCGCCGGGGTAATTATGCAGGGGCTTTTTCGCAACCCAATGGCTGACCCTGGATTACTCGGCGTCAGTAGCGGTTCTGCATTAATGGTTGGCGTTGCTATTGTGCTGCCCTTCTCCTTCCCAGTGGTGCTGGTGCTCTATGAGCAAATGGTGTTTGCCATTGCCGGAAGTTTAGTGGTCTGCACCATCATTTTTCTC…
VFG000923(gb|NP_752600) (fepA) ferrienterobactin outer membrane transporter [Enterobactin (VF0228)] [Escherichia coli CFT073]	ATGAACAAGAAGATTCATTCCCTGGCCTTGTTGGTCAATCTGGGGATTTATGGGGTAGCACAGGCACAAGAGCCGACCGATACTCCTGTTTCACATGACGATACCATTGTCGTTACCGCCGCCGAGCAGAACTTGCAGGCGCCTGGCGTTTCGACCATTACCGCAGATGAAATCCGCAAAAACCCGGTTGCCCGCGATGTATCGGAGATCATTCGTACCATGCCTGGCGTTAACCTGACCGGTAACTCCACCAGTGGTCAGCGTGGTAATAACCGCCAGATTGATATTCGCGGCATGGGTCCGGAAAACACGCTGATTTTGATTGACGGCAAGCCGGTAAGCAGCCGTAACTCTGTGCGTCAGGGCTGGCGTGGCGAGCGCGATACCCGTGGTGATACC…
VFG000924(gb|NP_752610) (fepB) ferrienterobactin ABC transporter periplasmic binding protein [Enterobactin (VF0228)] [Escherichia coli CFT073]	GTGAGACTCGCCCCGCTCTACCGCAACGCCCTTCTATTAACAGGACTTTTGCTTTCAGGAATAGCCGCAGTTCAGGCCGCCGACTGGCCGCGTCAGATTACTGACAGCCGTGGCACTCATACCCTGGAAAGCCAGCCGCAGCGTATAGTTTCCACCAGCGTCACCCTGACCGGCTCACTGCTGGCGATTGATGCTCCGGTGATCGCCAGCGGCGCGACCACGCCAAATAACCGCGTCGCGGATGACCAGGGCTTTTTACGCCAGTGGAGCAAGGTGGCGAAAGAACGCAAACTGCAACGGCTCTATATCGGCGAACCGAGTGCAGAAGCCGTTGCCGCGCAAATGCCGGATCTGATTTTAATTAGCGCAACCGGCGGCGATTCGGCGCTGGCGCTGTAC…
VFG000925(gb|NP_752606) (fepC) ferrienterobactin ABC transporter ATPase [Enterobactin (VF0228)] [Escherichia coli CFT073]	ATGACCGAATCAGTAGCCCGTTTGCGCGGCGAACAGTTAACCCTCGGATATGGCAAATATACCGTTGCGGAAAATCTGACTGTAGAAATACCTGATGGTCACTTCACGGCAATTATCGGGCCAAATGGCTGCGGTAAATCCACGTTACTGCGTACCTTAAGCCGCCTGATGACGCCTGCTCACGGGCATGTCTGGCTGGATGGCGAGCACATTCAACATTACGCCAGTAAAGAGGTTGCACGCCGGATTGGTCTGTTGGCGCAAAATGCTACCACACCGGGCGATATCACCGTGCAGGAGCTGGTGGCGCGTGGGCGTTACCCGCATCAACCGCTGTTTACCCGCTGGCGCAAAGAAGATGAAGACGCGGTAACAAAAGCGATGCAGGCCACGGGAATA…
VFG000926(gb|NP_752608) (fepD) ferrienterobactin ABC transporter permease [Enterobactin (VF0228)] [Escherichia coli CFT073]	ATGGAAGTTCGTATGTCTGGTTCTGTTGCCGTGACACGCGCCATTGCCGTGCCCGGATTGCTGTTATTACTGATTATCGCGACGGCATTAAGCCTGCTCATTGGGGCAAAATCACTCCCCGCTTCCGTAGTGCTGGAGGCCTTCTCCGGCACCTGCCAGAGCGCCGACTGCACCATCGTGCTCGACGCACGACTGCCGCGCACCCTTGCCGGTTTACTGGCAGGCGGTGCGCTTGGCCTTGCCGGGGCGTTAATGCAAACCCTCACCCGAAACCCACTTGCCGATCCTGGTTTGCTTGGCGTGAACGCCGGTGCCAGTTTTGCCATTGTGCTGGGTGCGGCGCTGTTTGGTTACTCTTCCGCACAGGAACAACTGGCGATGGCCTTCGCCGGGGCGCTG…
VFG000928(gb|NP_752607) (fepG) iron-enterobactin ABC transporter permease [Enterobactin (VF0228)] [Escherichia coli CFT073]	ATGATTTACGTCTCTCGCCGATTAATTATCACCTGTCTGCTGTTGCTAATAGCTTGTGTGATGGCAGGCGTGTGGGGATTACGTAGCGGTGCCGTCACGCTGGAAACTTCGCAGGTATTCGCCGCGTTGATGGGCGACACGCCGCGCAGTATGACGATGGTGGTCACCGAATGGCGTTTACCACGCGTGCTGATGGCGCTGTTGATTGGCGCGGCGCTGGGCGTCAGCGGCGCGATTTTTCAGTCGCTGATGCGTAACCCGCTCGGCAGCCCTGACGTAATGGGCTTTAACACCGGGGCGTGGAGCGGCGTGCTGGTGGCGATGGTGCTGTTTGGTCAGGACCTGACGGCTATCGCGCTGGCAGCAATGGTGGGCGGCATTGTCACTTCGCTGTTGGTC…
VFG000929(gb|NP_752599) (entD) phosphopantetheinyl transferase component of enterobactin synthase multienzyme complex [Enterobactin (VF0228)] [Escherichia coli CFT073]	GTGCGCGTAGTTCATGCCGGATGCGGCGTGAACGCCTTATCCGGCCTACAAAAATCTTGCCAATTCAATATATTGCAGGACCACGTAGGCCTGATAAGCGTAGCGCATCAGGCAGTTTTGCGTTTGTCATCATTCTCTAATATGGTTGACATGAAAACTACGCATACCTCCCTCCCCTTTGCAGGACATACGCTGCATTTTGTTGAGTTTGATCCGGCGAGTTTTCGCGAGCAGGATTTACTCTGGCTGCCGCACTACGCACAACTTCAACACGCTGGACGTAAACGTAAAACAGAGCATTTAGCCGGGCGGATCGCTGCAATTTATGCGCTGCGGGAATATGGCTATAAATGTGTGCCTGCAATCGGCGAGCTACGCCAACCTGTGTGGCCTGCGGGG…
VFG000930(gb|NP_752604) (entF) enterobactin synthase multienzyme complex component, ATP-dependent [Enterobactin (VF0228)] [Escherichia coli CFT073]	ATGAGCCAGCATTTACCTTTGGTCGCCGCACAGCCCGGCATCTGGATGGCAGAAAAACTGTCGGATTTACCCTCCGCCTGGAGCGTGGCGCATTACGTTGAGTTAACCGGAGAGGTTGATGCGCCACTACTGGCCCGCGCGGTGGTTGCCGGACTAGCGCAAGCAGATACGTTGCGGATGCGTTTTACGGAAGATAACGGCGAAGTCTGGCAGTGGGTCGATGATGCGCAGACGTTCGAACTGCCAGAAATTATCGACCTGCGAACCAACATTGATCCGCACGGTACTGCGCGGGCATTAATGCAGGCGGATTTGCAACAAGATCTGCGCGTCGATAGTGGTAAACCACTGGTCTTTCATCAACTGATACAGGTGGCGGATAACCGCTGGTACTGGTAT…
VFG000931(gb|NP_752611) (entC) isochorismate synthase 1 [Enterobactin (VF0228)] [Escherichia coli CFT073]	GTGGAGGATGATATGGATACGTCACTGGCTGAGGAAGTACAGCAGACCATGGCAACACTTGCGCCCAATCGCTTTTTCTTTATGTCGCCGTACCGCAGTTTTACGACGTCAGGATGTTTCGCCCGCTTCGATGAACCGGCTGTGAACGGGGATTCGCCCGACAGTCCCTTCCAGCAAAAACTCGCCGCGTTGTTTGCCGATGCCAAAGCGCAGGGCATCAAAAATCCGGTGATGGTCGGGGCGATTCCCTTCGATCCACGTCAGCCTTCGTCGCTGTATATACCTGAATCCTGGCAGTCGTTCTCCCGTCAGGAAAAACAAGCTTCCGCACGCCGTTTCACCCGCAGCCAGTCGCTGAACGTGGTGGAACGTCAGGCCATTCCGGAACAAACCACGTTT…
VFG000932(gb|NP_752612) (entE) 2,3-dihydroxybenzoate-AMP ligase component of enterobactin synthase multienzyme complex [Enterobactin (VF0228)] [Escherichia coli CFT073]	ATGAGCATTCCATTCACCCGCTGGCCGGAAGAGTTTGCCCGTCGCTATCGGGAAAAAGGCTACTGGCAGGATTTGCCGCTGACCGACATTCTGACCCGTCATGCCGCAAGCGACAGCATCGCGGTCATCGACGGCGAGCGGCAGTTGAGTTACCGGGAGCTGAATCAGGCGGCGGATAACCTCGCCTGTAGTTTGCGCCGTCAGGGCATTAAACCTGGTGAAACCGCGCTGGTACAACTGGGTAACGTCGCTGAACTTTACATTACCTTTTTCGCGCTGCTGAAACTGGGCGTTGCGCCGGTGCTGGCGCTGTTCAGCCATCAGCGTAGTGAACTGAACGCCTATGCCAGCCAGATTGAACCGGCGTTACTGATTGCCGATCGCCAACATGCGCTATTT…
VFG000933(gb|NP_752613) (entB) isochorismatase [Enterobactin (VF0228)] [Escherichia coli CFT073]	ATGGCTATTCCAAAATTACAGGCTTACGCACTGCCGGAGTCTCACGATATTCCGCAGAATAAAGTCGACTGGGCCTTTGAACCGCAACGTGCCGCGTTGTTAATCCATGATATGCAGGACTATTTTGTCAGCTTCTGGGGTGAGAACTGCCCGATGATGGAGCAGGTGATCGCGAATATTGCGGCACTACGCGACTACTGCAAACAGCACAATATCCCGGTTTATTACACCGCCCAGCCGAAAGAGCAGAGCGATGAAGATCGGGCGCTGTTGAATGATATGTGGGGGCCTGGCCTGACCCGTTCGCCGGAACAGCAAAAGGTGGTGGATCGCCTGACGCCAGATGCCGACGACACGGTGCTGGTGAAATGGCGCTACAGCGCGTTTCATCGTTCCCCG…
VFG000934(gb|NP_752614) (entA) 2,3-dihydro-2,3-dihydroxybenzoate dehydrogenase [Enterobactin (VF0228)] [Escherichia coli CFT073]	ATGGATTTCASCGGTAAAAATGTCTGGGTAACTGGCGCGGGGAAAGGTATCGGCTATGCCACGGCGATGGCATTTGTTGAGGCGGGGGCGAAAGTTACAGGTTTTGATCAAGCGTTTACTCAGGAGCAATATCCTTTTGCGACCGAAGTAATGGATGTTGCCGATGCTGCGCAGGTGGCGCAGGTATGTCAGCGACTGTTAGCTGAAACGGAGCGACTGGACGTGCTGGTCAATGCGGCGGGAATTTTGCGCATGGGTGCGACCGATCAGCTCAGTAAAGAGGACTGGCAGCAGACTTTTGCGGTCAACGTCGGCGGTGCGTTTAACCTGTTTCAGCAGACCATGAACCAGTTTCGCCATCAGCGGGGCGGGGCGATTGTTACTGTTGCGTCCGACGCC…
VFG000935(gb|NP_753164) (iroN) salmochelin receptor IroN [IroN (VF0230)] [Escherichia coli CFT073]	ATGAGAATTAACAAAATCCTCTGGTCGCTAACTGTGCTCCTAGTTGGGTTGAATAGCCAGGTATCAGTAGCCAAATACTCCGACGATGATAATGACGAGACTCTGGTGGTGGAAGCCACCGCTGAGCAGGTATTAAAACAGCAGCCGGGCGTGTCGGTTATTACCAGCGAGGATATTAAAAAGACCCCTCCGGTAAACGACCTTTCAGATATTATTCGTAAAATGCCTGGTGTTAATCTTACCGGCAATAGCGCCTCGGGCACACGCGGTAATAACCGCCAGATCGATATTCGTGGTATGGGGCCGGAAAACACCTTAATTTTAATTGATGGTGTACCGGTGACGTCACGTAACTCCGTGCGTTATAGCTGGCGTGGGGAGCGTGATACCCGCGGTGAC…
VFG000936(gb|NP_755498) (iutA) ferric aerobactin receptor precusor IutA [Aerobactin (VF0229)] [Escherichia coli CFT073]	GTGGCGCAGCGGCAGCCGGAAAAAACCGCAGCCGGAGGCTGCTGCTTTAACTCACTATACAACAAATATTCAGGAATAACGATGATGCGCAAAAAGTATATGCCCCGGGCTCTTGGTCCGCTGCTTCTTGTCGTGCTGTCACCAGCTGTCGCCCAGCAAAACGATGATAATGAGATCATAGTGTCTGCCAGCCGCAGCAATCGAACTGTAGCGGAGATGGCGCAAACCACCTGGGTTATCGAAAATGCCGAACTGGAGCAGCAGATTCAGGGCGGTAAAGAGCTGAAAGACGCACTGGCTCAGTTAATCCCCGGCCTTGATGTCAGCAGCCAGAGCCGAACCAACTACGGTATGAACATGCGTGGCCGCCCGCTGGTTGTCCTGATTGACGGTGTGCGC…
VFG000938(gb|NP_755500) (iucC) aerobactin siderophore biosynthesis protein IucC [Aerobactin (VF0229)] [Escherichia coli CFT073]	ATGAATCACAAGGACTGGGATTTTGTTAACCGTCGGCTGGTGGCAAAAATGTTGTCTGAGATGGAGTATGAGCAGGTTTTCCACGCGGAATCTCAGGGCGATGACCACTACTGCATTAACCTGCCGGGAGCACAATGGCGCTTTATCGCTGAACGTGGTATCTGGGGCTGGCTGTGGATTGATGCCCAAACGTTGCGCTGCACGGACGAACCAGTACTGGCGCAGACGCTGCTGATGCAGCTAAAGCCGGTGCTGTCAATGAGTGATGCCACTGTTGCAGAGCATATGCAGGATTTGTATGCCACGCTACTGGGCGACCTGCAACTGCTGAAGGCCCGTCGCGGACTGAGTGCCAGTGACCTGATTAATCTTGATGCCGATCGTCTGCAATGCCTGCTG…
VFG000940(gb|NP_755502) (iucA) aerobactin siderophore biosynthesis protein IucD [Aerobactin (VF0229)] [Escherichia coli CFT073]	TTGATAATGAGAATCATTATTGACATAATTGTTATTATTTTACTGTGTGGGAGCTGTTTGACTATGACCCTGCCCTCTGAAAAACCAGCCACAGATGTGGCTGCGCAGTGCTTCCTGAATGCACTGATTCGTGAAACCACAGACTGGAAACTGACAGAATACCCGCCAGACGAATTGATCATCCCGCTGGATGAGCAGAAATCGCTCCATTTCAGAGTGGCTTATTTCTCCCCAACCCAGCATCACCGCTTTGCATTTCCTGCACGTCTGGTCACGGCATCAGGCAGTTATCCTGTCGACTTTACCACTCTCTCCCGGCTTATTATTGATAAGCTACGGCATCAACTGTTTCTGCCCGTTCCCCTCTGCGAAACTTTCCACCAGCGCGTGCTGGAAAGC…
VFG001254(gb|NP_249795) (fliI) flagellum-specific ATP synthase FliI [Flagella (VF0273)] [Pseudomonas aeruginosa PAO1]	ATGCGCCTTGAGCGAACCAGTTTCGCCAGGCGCCTGGAGGGCTACACCGAGGCTGTCTCGCTGCCGGCGCAGCCGGTGGTCGAGGGCCGCCTGCTGCGCATGGTCGGCCTGACCCTCGAAGCCGAAGGCTTGCAGGCCGCGGTCGGCAGCCGCTGCAACGTGATCAACGAAAGCGGCTACCACCCGGTGCAGGTGGAGGCCGAAGTGATGGGCTTTTCCGGTAGCAAGGTGTACCTGATGCCGGTCGGCAGCCTCGCCGGCATCGCGCCCGGCGCGCGGGTCGTGCCGCTGCCGGACACCGGGCGCCTGCCGATGGGCATGTCGATGCTCGGCCGCGTGCTCGACGGCGCCGGCCGCGCCCTCGACGGCAAGGGCGGGATGCGCGCCGAAGACTGGGTG…
VFG001290(gb|NP_647368) (clfB) Clumping factor B, adhesin [Clumping factor (VF0004)] [Staphylococcus aureus subsp. aureus MW2]	TTGAAAAAAAGAATTGATTATTTGTCGAATAAGCAGAATAAGTATTCGATTAGACGTTTTACAGTAGGTACCACATCAGTAATAGTAGGGGCAACTATACTATTTGGGATAGGCAATCATCAAGCACAAGCTTCAGAACAATCGAACGATACAACGCAATCTTCGAAAAATAATGCAAGTGCAGATTCCGAAAAAAACAATATGATAGAAACACCTCAATTAAATACAACGGCTAATGATACATCTGATATTAGTGCAAACACAAACAGTGCGAATGTAGATAGCACAGCAAAACCAATGTCTACACAAACGAGCAATACCACTACAACAGAGCCAGCTTCAACAAATGAAACACCTCAACTGACGGCAATTAAAGATCAAGCAACTGCTGCAAAAATG…
VFG001443(gb|AAF37887) (ompA) outer membrane protein A [OmpA (VF0236)] [Escherichia coli O18:K1:H7 str. RS218]	ATGAAAAAGACAGCTATCGCGATTGCAGTGGCACTGGCTGGTTTCGCTACCGTAGCGCAGGCCGCTCCGAAAGATAACACCTGGTACACTGGTGCTAAACTGGGCTGGTCCCAGTACCATGACACTGGTTTCATCAACAACAATGGTCCGACCCATGAAAACCAACTGGGCGCTGGTGCTTTTGGTGGTTACCAGGTTAACCCGTATGTTGGCTTTGAAATGGGTTATGACTGGTTAGGTCGTATGCCATACAAAGGCAGCGTTGAAAACGGTGCATATAAAGCTCAGGGCGTTCAGCTGACCGCTAAACTGGGTTACCCAATCACTGACGATCTGGACGTATACACTCGTCTGGGTGGTATGGTATGGCGTGCAGACACTAAATCCAACGTTTATGGT…
VFG001444(gb|AAG10151) (aslA) putative arylsulfatase [AslA (VF0238)] [Escherichia coli O18:K1:H7 str. RS218]	ATGGAATTATCGTTTTCACCCAAACTTCTTGTTGTTGCTGTCGCCGCAGCTCTTCCTCTCATAGCCAGCGCAGCAGATACCCCGTCAACCGCCACCGCACGCAAAGGCTTTGCCGGATACGATCACCCAAACCAGTATCTGGTTAAACCGGCGACCACTTTTGCCGACAACATGATGCCGGTGATGCAGCATCCTGCACAAGACAAAGAAACCCAGCAGAAACTGGCGGAACTTGAGAAAAAAACCGGTAAGAAACCGAATGTGGTTGTTTTCTTGCTGGATGATGTGGGCTGGATGGACGTTGGCTTTAACGGCGGCGGCTTGGCGGTGGGTAACCCTACACCAGATATCGACGCCGTTGCCAGCCAGGGGCTGATTTTAACTTCGGCGTATTCTCAA…
VFG001534(gb|AAD49229) (efa1) EHEC factor for adherence [Efa-1/LifA (VF0204)] [Escherichia coli O111:H- str. E45035]	ATGAGACTGCCAGAGAAAGTTCTTTTTCCTCCTGTCACTAGTGGCCTGTCAGGGCAGGAAAAACAAAAAAAACCGAAGAGCATTACCGGATTTCAGGAAAATTATCAACGCAATATCAGGCCAATCAAAACAGCATCAGAAGCCCGACTACGCTTCTTTGATAAAATGGTTTCGAAAGAAAACTCTCTGGAAGATGTTGTTTCTTTAGGTGAAATGATTCAGAAGGAAATTTATGGGCATGAACAAAGAACATTTTCACCAGTTCATCATACAGGTAACTGGAAATCATCATTGTTACACAACGCGCTCCTTGGTCTGGCAAATGTTTATAATGGCTTACGGGAAACAGAATACCCTAACACTTTCAACAGAGATGGTATAAAAAGTACTAACTCTTTT…
VFG001827(gb|YP_406304) (senB) enterotoxin [ShET2 (VF0258)] [Shigella flexneri 2a str. 301]	TTGTTAATTTCACTATTTTTACCCACGATGGCCATGGCTATCGATCCACCTGAACGCGAACTTTCGCGATTTGCCCTGAAAACGAATTACCTTCAGTCCCCTGATGAAGGCGTCTATGAACTGGCGTTTGATAATGCCAGTAAAAAGGTGTTTGCAGCAGTCACCGATCGTGTAAATCGTGAAGCCAATAAAGGCTATCTGTATTCGTTTAATTCAGATTCGCTGAAAGTCGAAAATAAATACACGATGCCATACCGGGCATTTTCGCTGGCGATAAATCAGGATAAACATCAGCTCTATATCGGACACACCCAGTCAGCGTCCCTGCGTATCAGTATGTTTGACACCCCAACCGGTAAACTGGTAAGAACCAGCGACAGGTTAAGTTTTAAAGCGGCA…
VFG001829(gb|YP_403026) (stxB) Shiga toxin subunit B precursor [Shiga toxin (VF0117)] [Shigella dysenteriae Sd197]	ATGAAAAAAACATTATTAATAGCTGCATCGCTTTCATTTTTTTCAGCAAGTGCGCTGGCGACGCCTGATTGTGTAACTGGAAAGGTGGAGTATACAAAATATAATGATGACGATACCTTTACAGTTAAAGTGGGTGATAAAGAATTATTTACCAACAGATGGAATCTTCAGTCTCTTCTTCTCAGTGCGCAAATTACGGGGATGACTGTAACCATTAAAACTAATGCCTGTCATAATGGAGGGGGATTCAGCGAAGTTATTTTTCGTTGA
VFG001855(gb|YP_094724) (htpB) Hsp60, 60K heat shock protein HtpB [Hsp60 (VF0159)] [Legionella pneumophila subsp. pneumophila str. Philadelphia 1]	ATGATAATGGCTAAAGAATTACGTTTTGGTGATGACGCTCGCCTACAAATGCTTGCTGGTGTTAATGCATTAGCAGATGCGGTTCAAGTTACTATGGGTCCACGTGGTCGTAATGTTGTATTGGAAAAATCTTATGGCGCTCCTACTGTAACTAAAGACGGTGTGTCTGTTGCCAAAGAAATTGAGTTTGAGCATCGTTTCATGAACATGGGCGCTCAAATGGTTAAAGAAGTGGCTTCTAAAACTTCTGATACTGCTGGTGATGGTACTACTACTGCAACAGTATTGGCTCGTTCTATTCTTGTTGAAGGTCACAAAGCAGTTGCTGCTGGTATGAATCCAATGGATCTCAAACGCGGTATTGATAAAGCAGTATTAGCAGTTACCAAAAAATTACAA…
VFG002048(gb|YP_404601) (gspE) general secretion pathway protein E [T2SS (VF0333)] [Shigella dysenteriae Sd197]	ATGGTGCCTGTAGCACAGGAAACCACCGCCAACACCGTGCGTCTGCCCTACAGTTTCAGCCGTCGGTTTAGCCTGGTGGCATGGTGCGAAGCGTCGCTGGAGATCCTCCACGTTCATCCGCTATCGCTCTCTGTTTTGCAGGAGCTGCAGCGGGGGCTGAACGCGCCCTTTACGCTGCGGCAAATCGACGAGGCCGAATTTGAACAGCGGCTGAATACGGTCTGGCAGCGGGACTCTTCCGAGGCCCGCCAGCTGATGGAAGAGCTCGGTTCTGCTGAGGACTTTTTTACTCTCGCTGAAGAATTGCCGGAAACGGAAGATCTGCTGGAAAGCGACGACGACGCGCCAATCATCAAACTGATCAACGCTATGCTGGCAGAGGCGATTAAAGAAGGCGCT…
VFG002050(gb|YP_404603) (gspG) general secretion pathway protein G [T2SS (VF0333)] [Shigella dysenteriae Sd197]	ATGAATTCGTTATCCCGCACACAAAAGCCACGGACAGGTTTTACCCTGCTGGAAGTGATGGTGGTGATTGTTATTCTTGGCGTTCTGGCAAGTCTGGTGGTGCCTAACCTGTTGGGCAACAAAGAGAAAGCGGACAGGCAAAAAGCCATCAGCGATATCGTGGCACTGGAGAATGCGCTGGATATGTACCGACTGGATAACGGGCGTTATCCGACCACAGAACAGGGGCTTGAGGCGCTGATCCAGCAACCGGCCAATATGGCGGATTCCCGTAACTACCGTACCGGTGGGTACATTAAACGACTGCCAAAAGATCCGTGGGGCAATGATTATCAGTATCTCAGCCCGGGTGAAAAAGGACTGTTTGATGTTTACACCCTGGGGGCGGATGGTCAGGAA…
VFG002070(gb|NP_248774) (hsiC1/vipB) type VI secretion system tubule-forming protein VipB [HSI-I (VF0334)] [Pseudomonas aeruginosa PAO1]	ATGGCCGAATTGAGCACCGAGAACCTGGCCCAGGGCCAGACCACCACCGAGCAGACCAGTGAGTTCGCCAGCCTGCTGCTGCAGGAGTTCAAGCCCAAGACCGAGCGCGCCCGCGAAGCGGTGGAGACCGCCGTGCGGACCCTCGCCGAGCATGCCCTGGAGCAGACCAGCCTGATCTCCAACGACGCGATCAAGTCGATCGAGTCGATCATCGCGGCGCTTGACGCCAAGCTCACCGCGCAGGTCAACCTGATCATGCACCACGCCGACTTCCAGCAACTGGAAAGCGCCTGGCGCGGCCTGCACTACCTGGTCAACAACACCGAGACCGACGAGCAACTGAAGATCCGCGTGCTGAACATCTCCAAGCCGGAGCTGCACAAGACCCTGAAGAAATTC…
VFG002076(gb|NP_248780) (clpV1) type VI secretion system AAA+ family ATPase [HSI-I (VF0334)] [Pseudomonas aeruginosa PAO1]	ATGAGTGAGATCAGTCGCGTTGCGCTGTTCGGCAAGCTGAACAGCCTGGCCTACAAGGCCATCGAGGCCGCCACGGTATTCTGCAAGCTGCGCGGCAATCCCTATGTCGAGCTGGTGCACTGGTTCCACCAGATCCTCCAGTTGCCGGACTCGGACCTGCACCAGATCGTCCGCCAGTCCGGGATCGACCCGGCGCGCCTGGCCAAGGACCTGACCGAGGCCCTCGACCGTCTGCCGCGCGGCTCGACCTCGATCACCGACCTGTCCTCCCATGTCGAGGAAGCGGTGGAGCGCGGCTGGGTCTACGGCAGCCTGATGTTCGGCGAGAGCCAGGTGCGCACCGGCTACCTGGTGATCGGCATCCTCAAGACGCCGAGCCTGCGCCATGCCCTCACCGGG…
VFG002085(gb|NP_232518) (vasH) type VI secretion system regulatory protein VasH [T6SS (VF0335)] [Vibrio cholerae O1 biovar El Tor str. N16961]	ATGAGTCAATGGCTGGCGTTTGCAACCCAATTGGTGGGAGTAAGGAAGTCCCACCAGCTTGCGCTGCAATTTGTTGATCTGCTGACTCAAGGCTTAGATCTGAGTGATAGCCTTTTGTTGTTGCCATCGTCGGATGGGCGTTTACTTGTGCCTCATGATCCACAGCGTCAGTTCGCGTGGTCAGTGACGGATTTTGATGTGCCTTTTGCCCATGTTTTGCAGTCATCCAATGCGATGCATTTGACCGCGGAAGAGTTGGTATTTTGGCAATCCAATCGCACTTTTAGCCAGTTAACCTCTCGCGTGGGGATGTTTGATTCGGTATGGATCCAACCCCTGCCGATGGATACTCGTCAAGTACACTCGATCTTGCTGTTGATGGGCGAGAGTCACGGTATC…
VFG002121(gb|NP_287961) (nleA/espI) Type III secretion system effector NleA [NleA/EspI (VF0338)] [Escherichia coli O157:H7 str. EDL933]	ATGAACATTCAACCGACCATACAATCTGGAATCACCTCACAAAACAATCAACATCATCAAACAGAACAAATACCCTCTACACAAATACCGCAATCCGAATTACCTCTAGGATGCCAAGCTGGATTTGTTGTTAATATTCCAGATGATATACAGCAACATGCACCGGAATGCGGTGAAACAACAGCTCTACTGAGCTTGATAAAAGATAAAGGTCTGCTCTCAGGGCTAGACGAATATATAGCTCCTCACCTTGAAGAAGGATCCATAGGAAAAAAAACATTGGATATGTTTGGTTTATTCAATGTTACCCAAATGGCATTAGAGATACCTAGTTCCGTTTCAGGCATCTCTGGTAAATATGGTGTCCAGCTAAACATTGTAAAACCAGATATTCATCCT…
VFG002122(gb|NP_286533) (nleC) Type III secretion system effector NleC, zinc metalloprotease [NleC (VF0340)] [Escherichia coli O157:H7 str. EDL933]	ATGAAAATTCCCTCATTACAGTCCAACTTCAACTTTTCCGCCCCGGCAGGATACTCTGCTCCCATTGCTCCTAATCGTGCTGAAAATGCCTATGCGGATTACGTTTTGGATATAGGTAAGCGAATACCACTTTCCGCAGCAGATTTAAGCAACGTATACGAAAGTGTAATACGCGCCGTCCATGACAGCCGTAGCAGGCTTATCGATCAGCATACAGTCGATATGATCGGCAACACTGTACTTGATGCTTTGAGCCGATCACAGACATTTCGTGATGCCGTAAGCTATGGCATTCATAATGAGAAGGTACACATTGGTTGCATTAAATACAGAAACGAATACGAGCTTAACGAAGAATCTTCTGTCAAAATTGATGATATTCAATCACTAACCTGTAAC…
VFG002123(gb|NP_286535) (nleD) Type III secretion system effector NleD [NleD (VF0343)] [Escherichia coli O157:H7 str. EDL933]	ATGCGCCCTACGTCCCTCAACTTGGTATTACATCAGTCATCAAGGTCGAGCTCAATGTCAGATACAGATATCGAGTCTCTTGTAAAAGCATCGAGCGTTCAATGGATAAAAAATAATCCGCAACTTCGTTTCCAGGGGACTGATCATAATATATATCAGCAGATTGAAGCAGCACTCGATAAGATTGGCTCTACAGAGACAGGGCGTGTACTCCTGAATGCTATTGAATCAATATCCCGACTTAAATCAGAAACAGTGGTAATACACCTCAACTCTTCCAGACTAGGAGTTATGGCACATAGAGATATAGATGCTGAGAACCATCGGGGGACTGGTTCCGATTTTCACTGTAATCTGAATGCAGTTGAATATCCCTGTGGGGAGGGGATTAGCGTGGTG…
VFG002304(gb|NP_462656) (misL) putative autotransporter [MisL (VF0397)] [Salmonella enterica subsp. enterica serovar Typhimurium str. LT2]	ATGCCAACTCCCCAAAATTACTCATTCATCGCCATAGCGGTATCAGCAGCATTAGCCTCTATGGTATTTCCCTCCCAGGCGGCCTGGGTTGACGTTGATAGTCTGCCATCCAGTGGGCTGGTCAGTCAGTTGCCGCCGGAATTACAGGCTATTATTCCCGCTCAGGCCAGTACCGGTTTCACCAAAGTCGGGACCATGCCCAACTACGTTTATCAGTGGAACACCGGCACCATCCCGGTTTATGGCAATGGCCTCACGCTTAATGGGCCGGGCGCGGAGGCGTTTGAACACACTGTCACGGTTATTCAAAACAGCGGGACGGGAAGTCCGGGCGTGATTTTTGGCAACGACCTGACCATTCGGACGCAGTCGGCGAATGCCGCGAATAATGGTAGAGAC…
VFG002305(gb|NP_461448) (shdA) AIDA autotransporter-like protein [ShdA (VF0398)] [Salmonella enterica subsp. enterica serovar Typhimurium str. LT2]	GTGCGAAATATGTATGTCGTGGCTTCAGAACTGGCGCGAGGCCACAGCAAAGTTAAAGCGCAAGTATGCGCGAGTGAAACCCATTCTCCAAACCAAAAGTCCGAATATGGACAAATAATAAAAGCAACGCGCGCGGCGCTGGCTTGCGCCGTGGCTGCGGCGCTCGGATTTTTCAGCCCGCTGGCTATGGCCGATAATCAGGTATCATATGCTGATGCGCAGCCCCACGTTCTGGATGCGTCAACGCCGCCGATAAGCTATTCGGGCACCGATGAAGGCGCGGCGCTATATGTCTCGGGTGTCGCCACCGTCGGCTGGCAGCCCACCACGGTCACAGGGACGGGGCTCGTCATTGAAACAAGCGGAGGCGGGGCTGATGATCCGGATGGCGGTAAGTAT…
VFG002306(gb|NP_461449) (ratB) putative outer membrane protein [RatB (VF0399)] [Salmonella enterica subsp. enterica serovar Typhimurium str. LT2]	GTGAAATCGAAAAAGTGTGTCGGTTTTTTACCCTGGCTGCTGCTATGCGCCCTCAGTTTAACGCCTTTCTTCGCGCAGGCCGTGCGAAGCAGCGGCGCATGGCAGGAACTCACTGAGCAAACTGCGGCTATTAATGGCACTCCGCCTCAGGCCGACAGTGTAACGATCCCGGTATATCAGGGCAGCGTGCAGTTGCGCTCTGATGCGGCGAATCCTGTTGACTACTCCGCGAAGCCCAGCCAGTTCAGCACCAGTGATGTCGGCAGCGCGCTGACCTTAACCAATCCGCACGACACCGAAGGCGATATCTTCGCCGTGCCGCCGCTGGCCTGGCAGGCTGAACGCGCGCCCGCCGTTACGCTGGTGTGGGCCGACGCCGCCACGCCGGACACGCCGCTT…
VFG002307(gb|NP_461452) (sinH) intimin-like protein [SinH (VF0400)] [Salmonella enterica subsp. enterica serovar Typhimurium str. LT2]	ATGGTGCGAAGGATTCGCATTCTGGTTTTGCTATTAGTGTCTGGAGTCTCAGTTGCGGCTTCTGGCGCAGATAACTCTGCATCTGCAAATGATGAAAGCCACTCCTCCCTGCCTGATTTAGCCAGCGAATCCGCGAAAAAAGAAGAACAGGAAAATAAAGGAAAGTCCTTTAAAGAACAGGGCGCTGACTACTTTATTAATTCCGCCACCCAGGGCTTTGATAATCTCACCCCGGAAGCGCTGGAATCCCAGGCGCGTAGCTATTTGCAAAACCAAATCACTTCCTCAGCACAGTCATATCTTGAAGGTGTAATGTCACCTTATGGCAAGATCCGTACCAGCCTGTCCGTGGGCGAAGGCGGCGATCTGGACGGCAGTTCGCTGGATTATTTTATTCCC…
VFG002319(gb|YP_001006726) (fliA) flagellar biosynthesis sigma factor [Flagella (VF0394)] [Yersinia enterocolitica subsp. enterocolitica 8081]	GTGAGCGATCTGTATACCGCCGAAGGCGTGATGGACAAGAATTCCCTCTGGCAACGCTATGTTCCTCTGGTGCGCCATGAGGCATTGCGTTTGCAGGTGCGACTGCCGGCCAGCGTGGAATTGGATGATTTGTTGCAGGCTGGGGGGATTGGTCTGCTGAATGCTGTTGAGCGTTATGACGCTTTACAAGGAACCGCATTTACCACTTATGCGGTACAGCGTATACGTGGCGCGATGTTGGATGAGCTGCGTAGCCGAGATTGGGCGCCACGTAGTGTACGGCGTAATGCACGCGAAGTAGCCAGTGCGATGCAAAAGGTTGAACAACGGCTCGGACGTCCGGCGACTGAGCAGGAAGTCGCACAAAATCTTGATATTGATTTGACTGAGTACCGCCAG…
VFG002321(gb|YP_001006728) (fliC) flagellin [Flagella (VF0394)] [Yersinia enterocolitica subsp. enterocolitica 8081]	ATGGCGGTCATTAACACTAACAGCCTGTCTCTGCTGACTCAGAACAACCTGAACAAATCCCAGTCTTCTTTAGGCACCGCCATTGAGCGTTTGTCTTCCGGTCTGCGTATCAACAGCGCAAAAGACGATGCAGCGGGTCAGGCGATTGCCAACCGTTTCACTTCTAACATCAACGGTTTGACTGTGGCAGCACGTAATGCCAACGACGGTATCTCACTGTCACAGACTGCTGAAGGCGCGTTGGGCGAAATCAACAACAACTTGCAACGTGTGCGTGACCTGACTGTTCAGGCGCAAAACAGCTCTAACTCAGCATCTGATATCGACTCCATCCAGTCTGAAGTTAACCAGCGCATGGAAGAAATCAACCGCGTGACCAAGCAAACTGATTTCAACGGC…
VFG002322(gb|YP_001006729) (fliC) flagellin [Flagella (VF0394)] [Yersinia enterocolitica subsp. enterocolitica 8081]	ATGGCGGTCATTAACACTAACAGCCTGTCTCTGCTGACTCAGAACAACCTGAACAAATCCCAGTCTTCTTTAGGCACCGCCATTGAGCGTTTGTCTTCCGGTCTGCGTATCAACAGCGCAAAAGACGATGCAGCGGGTCAGGCGATTGCCAACCGTTTCACTTCTAACATCAACGGTTTGACTGTGGCAGCACGTAATGCCAACGACGGTATCTCACTGTCACAGACTGCTGAAGGCGCGTTGGGCGAAATCAACAACAACTTGCAACGTGTGCGTGACCTGACTGTTCAGGCGCAAAACAGCTCTAACTCAGCATCTGATATCGACTCCATCCAGTCTGAAGTTAACCAGCGCATGGAAGAAATCAACCGCGTGACCAAGCAAACTGATTTCAACGGC…
VFG002323(gb|YP_001006730) (fliC) flagellin [Flagella (VF0394)] [Yersinia enterocolitica subsp. enterocolitica 8081]	ATGGCGGTCATTAACACTAACAGCTTGTCTCTGCTGACTCAGAACAACCTGAACAAATCCCAGTCTTCTTTAGGCACCGCCATTGAGCGTTTGTCTTCCGGTCTGCGTATCAACAGCGCAAAAGACGATGCAGCGGGTCAGGCGATTGCCAACCGTTTCACTTCTAACATCAACGGTTTGACTGTGGCAGCACGTAATGCCAACGACGGTATCTCACTGTCACAGACTGCTGAAGGCGCGTTGGGCGAAATCAACAACAACTTGCAACGTGTGCGTGACCTGACTGTTCAGGCGCAAAACAGCTCTAACTCAGCATCTGATATCGACTCCATCCAGTCTGAAGTTAACCAGCGCATGGAAGAAATCAACCGCGTGACCAAGCAAACTGATTTCAACGGC…
VFG002328(gb|YP_001006741) (fliF) flagellar M-ring protein FliF [Flagella (VF0394)] [Yersinia enterocolitica subsp. enterocolitica 8081]	ATGAATGCCTCGATAACTGGCGGTGAAAATCGTGAGAACACCTTTACGACGACACTGGCACGCCTACGCGCGAATCCAAAAATCCCATTGCTGATTGCTGCGGCTGCGGCCGTCGCTATTCTTGTCGCGCTGATGTTATGGGCTAAAAGCCCAGATTATCGCGTTCTTTATAGCAACCTGAATGATCGTGATGGTGGTGATATCGTCACGCAGTTGACGCAACTGAATATTCCCTATCGCTTCGCTGATAATGGCGGAGCATTGCTGATCCCGGCAGATAAAGTGCATGAAACCCGTCTGCGCCTGGCTCAACAAGGTTTACCGAAAGGTGGTGCAGTAGGCTTCGAACTACTGGATCAGGAAAAATTTGGCATCAGCCAATTTAGTGAACAAGTCAAC…
VFG002329(gb|YP_001006742) (fliG) flagellar motor switch protein G [Flagella (VF0394)] [Yersinia enterocolitica subsp. enterocolitica 8081]	ATGAGCCTGACCGGAACTGAAAAAAGCGCCATCATGCTGATGACTCTGGGTGAAGACCATGCCGCCGAGGTGTTTAAACACCTCTCCTCGCGCGAAGTTCAACAACTCAGTACCACCATGGCGAGTATGCGTCAGGTTTCTCACCAACAGTTGGTTGATGTATTGGCTGAGTTTGAAGACGATGCAGAGCAATATGCCGCACTGAGTGTGAATGCCAGCGATTACCTGCGCACCGTGCTGATAAAAGCATTGGGGGAAGAACGTGCCTCCAGTCTGTTGGAAGACATTCTGGAATCACGCGAAACCACCAGTGGCATGGAAACCCTCAACTTTATGGAACCGCAGATGGCGGCCGATCTGATTCGCGACGAACATCCGCAGATTATCGCCACTATTTTG…
VFG002331(gb|YP_001006744) (fliI) flagellum-specific ATP synthase FliI [Flagella (VF0394)] [Yersinia enterocolitica subsp. enterocolitica 8081]	ATGGATAAATTCGAAGAACGTATTAGCCAATCAACTACCATTCGCCGTTACGGGCGATTAACGCGCGCCACCGGCCTGGTGCTGGAAGCCACTGGCTTGCAACTGCCACTGGGGGCCACCTGTCTGATTGAGCGCCATGATAACGGCGAAGTACAAGAAGTTGAGAGTGAAGTGGTCGGTTTTAACGGCCAGCGCCTGTTCCTGATGCCACTGGAAGAAGTGGAAGGGATTGTGCCCGGCGCCCGGGTTTATGCACGCATCACCACCGGTGGAGCCTCGGCCAGTAAGCAATTGCCACTCGGCCCAGAATTACTCGGGCGCGTATTAGATGGCAGCGCCAAGCCACTTGATGGCTTACCCGCCCCTGAAACCGGCTACCGCGCCCCGCTTATCACTCCC…
VFG002334(gb|YP_001006747) (fliL) flagellar basal body protein FliL [Flagella (VF0394)] [Yersinia enterocolitica subsp. enterocolitica 8081]	ATGTCTCAAAATACCTTCCCGGCCAAGCGTAAGAGTTCGATCTGGGTGATCCTGCTGGTGCTGATTGCCGTAGCAGCCACTGCGGGTGGCGGTTATAGCTGGTGGATACTCAATAAGAGTAAACCCACCACAGCGAAAGTGGTACCGGTGATCCCGGTGTTTATGCCACTGGATACCTTCACGGTCAATCTGATCACACCCGATAATAATCTGGATCGTGTGCTTTATATCGGATTAACGTTAAGACTTCCCGACGATAGCACGCGCACAAAACTGAATGACTATCTGCCGGAAGTGCGCAGCCGTTTGCTGCTACTGCTCTCCCGTCAGTCCGCTGATAGCCTGGCGAACGAAGAAGGCAAACAGCGGTTAGTTGGTGAAATTAAAAACGTTCTTAGC…
VFG002335(gb|YP_001006748) (fliM) flagellar motor switch protein FliM [Flagella (VF0394)] [Yersinia enterocolitica subsp. enterocolitica 8081]	ATGGGCGATAGCATTCTTTCACAAGCAGAGATTGATGCACTGTTAAACGGCGACAGCGGAGGTGATGAACCCGAAGCTGTCATCGGCAATGAGACAGACGTCAAGCCTTATGATCCGACGACCCAGCGGCGAGTGGTACGTGAGCGCCTCCATGCGCTGGAGATAATCAATGAGCGGTTTGCCCGTCAGTTCCGTATGGGGCTATTTAACCTGTTACGCCGCAGCCCAGACATCACGGTTGGTCCGATAAAAATTCAGCCATACCATGATTTTGCCCGTAACTTGCCGGTGCCAACTAACCTCAACTTGATACATTTGAAACCGTTGCGCGGAACAGCACTGTTTGTTTTCGCTCCGAGTTTGGTGTTTATTGCGGTTGATAACCTGTTTGGTGGCGAT…
VFG002338(gb|YP_001006751) (fliP) flagellar biosynthetic protein FliP [Flagella (VF0394)] [Yersinia enterocolitica subsp. enterocolitica 8081]	GTGGCAATGGCGCAACTGCCGGGTATTATCAGCCAACCGTTAGCCAATGGTGGGCAAAGCTGGTCTTTACCGGTACAGACGCTGGTCTTTATCACCACACTGAGCTTCCTTCCTGCCGCATTACTGATGATGACCAGTTTTACCCGCATCATTATTGTGCTTGGTTTGTTGCGCAACGCATTGGGTACCCCCTCAGCGCCACCGAACCAAGTGATGCTGGGTTTGGCGCTGTTCCTGACTTTTTTCATCATGTCGCCGGTGTTTGACAAGGTCTATCAAGATGCTTATCTGCCCTTCAGCCAGGACAAAATAAGTATGGAAGTGGCAATGGATAAAGGCTCGCAACCGCTGCGCGAGTTTATGTTACGCCAGACCCGCGAATCTGACCTGGCACTGTAT…
VFG002341(gb|YP_001006754) (flgL) flagellar hook-associated protein 3 FlgL [Flagella (VF0394)] [Yersinia enterocolitica subsp. enterocolitica 8081]	ATGCGCTTAAGTACCAGCATGCTGTATCAGCAAAATATGCAGGGTGTCACTAATGCCCAATCCCTGTGGATGCAGTCGGGCCAACAACTCTCGACGGGCAAACGGGTGGTCAATCCTTCTGATGATCCGATGGCGGCCTCTCAGGCGGTTATGGTGTCACAGTCCCAGTCGGAAAATAGCCAGTACACCTTAGCGCGAAGCTTTGCGCGTCAAAGTTCCTCGCTGGAAACCACTGTATTATCACAGGCGACCTCCACCATTCAGTCAATTCAAAGTCTGATCATTGGTGCCGCTAAAGACTCTTTGAGTGATGATGACCGGGCGTCAATGGCAACACAATTGCAGGGTCTAAAAGATCAGTTGCTAAATCAGGCCAACTCAACTGACGGTAATGGCCGC…
VFG002343(gb|YP_001006756) (flgJ) flagellar rod assembly protein/muramidase FlgJ [Flagella (VF0394)] [Yersinia enterocolitica subsp. enterocolitica 8081]	ATGTTCGGGGCGGCTTATGATACCCAATCGCTGAACACCTTAAAACGCGATGCAGCCAGAGATCCCGATGGCAACCTGAAGAAGGTTGCACAGCAGGTGGAGGGGATGTTTGTGCAGATGATGCTGAAAAGTATGCGTTCTGCGCTGCCGCAAGATGGCGTTATGAACAGTGATCAAACGCGGCTCTATACCTCAATGTATGACCAACAGATTGCTCAGCAAATGTCGGTCAAAGGGTTAGGGCTGGCGGATATGATGGTGGAGCAGCTTTCGGGTACGACTTCACCGAGTGAAACTGCCGGTACAGTGCCAATGATGCTGGATAACGAAGTCTTGCAAACCCTGCCTGCGCAAGCATTGGAGCAAATAGTGCGCCGGGCAATACCGACACCACCGGCC…
VFG002345(gb|YP_001006758) (flgH) flagellar L-ring protein precursor FlgH [Flagella (VF0394)] [Yersinia enterocolitica subsp. enterocolitica 8081]	TTGAGATGGGTGGGGGCGCCTTTGATGGCAACGCTGCTACTCAATGGCTGCGCGTATATTCCGCACAAATCACTGGTAGATGGTTCGACGTCTGCCCAGCCTGCTCCTGCCAGTGCGCCACTACCGAATGGCTCTATTTTCCAGGCTGCCCAGCCGATGAACTATGGTTATCAGCCACTGTTCGAAGACCGTCGCCCACGTAATGTCGGTGATACGCTGACGATTACTTTGCAGGAAAATGTCAGTGCCAGCAAAAGCTCTTCAGCCAATGCGAGCCGCAATGGTTCCAGCAAATTTGGTGTTGCGACTGCTCCTCGCTATCTCGAAGGGTTACTGGGTAATGCACGCGCGGATATGGATATTTCTGGTGATAACACCTTTGGTGGCAAGGGGGGGGCC…
VFG002348(gb|YP_001006761) (flgE) flagellar hook protein FlgE [Flagella (VF0394)] [Yersinia enterocolitica subsp. enterocolitica 8081]	ATGGGCTTTTCTCAAGCAGTCAGCGGTTTGAACGCAGCGTCCAGTAACCTGGATGTGATCGGTAACAACATCGCCAACTCGGCGACGTCAGGTTTTAAAGCCGGCTCAGTTTCTTTTGCCGATATGTTTGCCGGCTCTCAGACCGGGATGGGCGTTAAAGTCGCAGGCATCACTCAGGACTTTAACGATGGTACCACCACCACCACTAACCGCCGTCTGGATCTGGCTATTAGTCAAAGTGGTTTCTTCCGTATGCAAGACAGCAGTGGCGGTGTGTTATATGCCCGTAACGGCCAGTTTAAACTGGATGAGAACCGCAATATCGTCAATATGCAGGGCCTGAGCTTAACCGGCTACCCGGCAACCGGTACCCCGCCGACCGTACAGCAAGGGGCGAAC…
VFG002350(gb|YP_001006763) (flgC) flagellar basal-body rod protein FlgC [Flagella (VF0394)] [Yersinia enterocolitica subsp. enterocolitica 8081]	ATGTCTTTACTGAATATTTTTGATATTGCCGGTTCTGCATTATCAGCCCAATCGCAGCGGTTGAACGTTAGCGCTAGTAACATGGCGAACGCCGACAGCGTAACAGGCCCAGATGGCCAGCCTTACCGCGCCAAGCAAGTGGTGTTTCAGGTGGCAGCTCAGCCGGGGCAAGAAACGGGCGGCGTACGTGTGGCACAGATAATCGATGATCCGGCACCGGATCGTTTGGTCTTCCAACCCGGCAATCCGCTGGCTGATGCCAAGGGGTATGTTCGTATGCCAAACGTTGATGTGACCGGCGAGATGGTGAACACCATTTCAGCTTCACGCAGTTATCAAGCTAACGTTGAAGTATTGAATACGACCAAATCGTTGATGCTCAAGACGCTGACACTGGGT…
VFG002356(gb|YP_001006770) (flhA) flagellar biosynthesis protein FlhA [Flagella (VF0394)] [Yersinia enterocolitica subsp. enterocolitica 8081]	ATGGCTAATTTGGCCGCCCTGCTTCGTTTACCGGGCAACTTCAAAGATACGCAGTGGCAAATTCTTGCCGGGCCAATCTTAATCCTCATGATCTTGTCGATGATGGTGCTGCCACTGCCGCCTTTCATCCTTGATTTGTTGTTTACCTTCAACATCGCGCTGTCCATCATGGTGTTGCTGGTTGCGATGTTTACTCAGCGTACTTTGGATTTTGCTGCATTCCCGACCATTCTGTTGTTCTCGACTTTACTGCGTTTATCCCTAAACGTGGCCTCTACTCGTATTATTCTGATGGATGGGCATACCGGTGCTGCGGCAGCAGGACGGGTGGTTGAAGCATTTGGCCATTTCCTGGTGGGCGGTAACTTCGCCATCGGTATCGTGGTCTTTGTTATTTTA…
VFG002412(gb|NP_286009) (yagY/ecpB) E. coli common pilus chaperone EcpB [ECP (VF0404)] [Escherichia coli O157:H7 str. EDL933]	ATGAAAAAGCACCTTCTGCTTCTCGCTCTGCTGTTATCCGGAATATCTCCGGCCCAGGCGCTGGATGTCGGCGATATATCATCGTTTATGAACAGTGACAGCAGCACGCTGAGCAAAACGATCAAAAACAGTACCGACAGTGGTCGCCTTATCAATATCCGTCTCGAACGGCTCTCTTCACCGCTTGACGACGGGCAGGTTATCTCAATGGACAAGCCGGACGAGTTGCTACTCACTCCCGCCAGCTTGCTGCTACCCGCCCAAGCCAGCGAAGTGATCCGCTTCTTCTATAAGGGACCAGCAGATGAAAAAGAGCGCTACTACCGCATTGTCTGGTTTGATCAGGCCCTCAGTGATGCGCAGCGCGATAATGCCAACCGCAGCGCTGTGGCCACTGCT…
VFG002413(gb|NP_286011) (ykgK/ecpR) regulator protein EcpR [ECP (VF0404)] [Escherichia coli O157:H7 str. EDL933]	GTGACATGGCAAAATGATTACAGCAGGGACTATGAGGTTGAAAACCATATGGAATGTCAAAACCGTTCTGATAAATACATCTGGTCTCCCCATGACGCCTACTTCTATAAAGGACTATCTGAACTGATTGTGGATATCGACAGATTAATTTATCTATCGCTGGAGAAAATCAGAAAAGATTTCGTGTTTATCAATCTCAATACGGATTCTTTAACTGAATTTATAAACCGTGATAATGAGTGGTTATCCGCGGTAAAGGGGAAACAGGTCGTATTGATTGCGGCCAGAAAGTCAGAAGCCTTAGCAAATTATTGGTATTACAACAGCAATATTAGGGGCGTGGTATACGCTGGACTGAGTCGTGATATTAGAAAAGAACTGGCCTATGTGATTAATGGC…
VFG002414(gb|NP_286010) (yagZ/ecpA) E. coli common pilus structural subunit EcpA [ECP (VF0404)] [Escherichia coli O157:H7 str. EDL933]	ATGAAAAAAAAGGTTCTGGCAATAGCTCTGGTAACGGTGTTTACCGGCATGGGTGTGGCGCAGGCTGCTGACGTAACAGCTCAGGCTGTAGCGACCTGGTCAGCAACAGCCAAAAAAGACACCACCAGTAAGCTGGTTGTGACGCCACTCGGTAGCCTGGCGTTCCAGTATGCCGAAGGCATTAAAGGTTTTAACTCACAGAAAGGTCTATTTGACGTGGCTATCGAGGGTGACTCAACGGCTACCGCCTTTAAACTGACCTCACGTCTTATCACCAACACATTAACCCAGTTGGATACCTCAGGTTCCACACTGAATGTGGGCGTGGATTATAACGGCGCGGCAGTCGAAAAAACTGGCGATACCGTGATGATCGATACCGCCAACGGCGTACTGGGC…
VFG002415(gb|NP_286008) (yagX/ecpC) E. coli common pilus usher EcpC [ECP (VF0404)] [Escherichia coli O157:H7 str. EDL933]	ATGCCTTTACGACGGTTCTCCCCAGGACTGAAAGCCCAGTTTGCCTTCGGCATGGTCTTTTTGTTCGTTCAGCCCGATGCCAGCGCTGCTGACATAAGTGCGCAGCAAATAGGTGGGGTGATTATTCCGCAGGCCTTCAGTCAGGCGCTTCAGGACGGCATGAGCGTCCCGCTCTATATTCATCTCGCCGGTAGCCAGGGTCGCCAGGACGATCAGCGAATCGGCAGCGCTTTTATCTGGTTGGATGATGGACAGCTACGCATCCGGAAAATACAGCTGGAAGAGAGTGAAGATAACGCCAGTGTCAGCGAACAAACTCGACAGCAGCTGATGGCTCTGGCGAACGCCCCGTTCAATGAGGCCCTTACCATCCCCCTGACTGACAACGCGCAGCTGGAT…
VFG002416(gb|NP_286007) (yagW/ecpD) polymerized tip adhesin of ECP fibers [ECP (VF0404)] [Escherichia coli O157:H7 str. EDL933]	ATGAGAGTTAACCTACTGATAGCGATGATAATCTTTGCGCTAATCTGGCCAGTAACTGCGCTCAGAGCGGCAGTGAGCAAAACAACCTGGGCGGATGCACCGGCACGCGAGTTTGTGTTTGTCGAAAACAACTCAGACGACAACTTTTTCGTCACTCCTGGCGGGGCGCTGGATCCGCGCCTGACCGGTGCCAACCGCTGGACCGGTTTAAAATACAATGGTTCAGGAACCATCTATCAGCAAAGCCTCGGCTACATTGATAACGGTTACAACACCGGCCTTTATACCAACTGGAAGTTTGATATGTGGCTGGAAAATTCACCAGTTTCATCTCCTTTAACTGGCTTGCGCTGCATCAACTGGTACGCTGGGTGTAATATGACCACCAGTCTTATCCTG…
VFG002417(gb|NP_286006) (yagV/ecpE) E. coli common pilus chaperone EcpE [ECP (VF0404)] [Escherichia coli O157:H7 str. EDL933]	ATGATAACGGCTGGTTTGGCGAAGTCAGCGCTTCAGGAGAAATTCATGTTCAGGCGACGTGGCGTAACATTAACTAAGGCCCTGCTGACAGCGGTCTGTATGCTGGCGGCACCTTTGACACAGGCGATTTCGGTCGGCAATCTGACTTTTTCACTGCCGTCCGAGACTGACTTTGTCAGCAAACGTGTAGTGAATAACAACAAAAGCGCGCGGATATACCGTATTGCCATCAGTGCTATCGATAGCCCGGGCAGCAGTGAATTACGCACCCGACCGGTGGATGGTGAACTGCTTTTCGCCCCCCGCCAGCTGGCGTTGCAGGCTGGTGAGAGCGAGTATTTTAAATTTTACTATCATGGGCCACAGGATAACCGCGAGCGCTACTACCGGGTCTCATTT…
VFG002480(gb|YP_111509) (tssH-5/clpV) Clp-type ATPase chaperone protein [T6SS-1 (VF0429)] [Burkholderia pseudomallei K96243]	ATGCTGCTGGTTGACCTGAAACCGTTGATCGAACAGCTCAACCCCTATTGCCGGAACGCGCTCGAAAGCGCCGTCGGCGCGTGCGTCGCGCGCCGGCACGACGACGTCGCCGTCGAGCACCTGCTCGCGCGGCTGTGCGACGAACCGTCGGCCGACGTCGCGCTGTTGCTGCGCGCGTGCGGCGCGGACGCGGCGCGCCTGCGCCGGCAGGCCGACGCCGCGCTCGACGCGCGCCCGGCGGGCGACGGCGGCCGCCCCGCGTTCGCGCCGTCGCTGCTCGCGCTGTTGCAGGACGCGTGGCTGATCGCGTCGCTCGAGCTCGGCGACACGCACATCCGCTCGGCGGCCGTGCTCGCCGCCGCGGTCGCCCGCGCGGCGCGGCAGCCGTCGCCCGGCGGC…
VFG002499(gb|YP_106855) (fliI) flagellum-specific ATP synthase FliI [Flagella (VF0430)] [Burkholderia pseudomallei K96243]	ATGGTGAGCGACGTCTGCGGCGGCGCGCTCGGCCGCGACGAACTCGACGCGCTCGAACGCGAGCTCGCGCTCGCATCGCGCGGCCCCGAGCACGAAGACGCGGCCGCGCACGGCGACGGCTTCGGCGCCCATCATCACGCGCCCCCGCGCCCGCTCGCGATGGGCGCGCCGAGCTCGCGCGCGACGCTCGCGAACCCGCATCTCGCGCATTGGCGCGCACATCTGGACGGCATCCGCGAGCGCAACGCGCGCGCGCTGCCGCTGCGCCCGTGCGGACGCCTCACCCGCGCGGCGGGCCTCGTGCTCGAAGCGATCGGGCTGCGCCTGTCGGTCGGCGCCGAATGCACGATCGAGCTGCCCGCGGGCAGCGCGCTGCCGTATGCGCAGGCCGAGGTCGTC…
VFG002522(gb|YP_109890) (flhA) flagellar biosynthesis protein FlhA [Flagella (VF0430)] [Burkholderia pseudomallei K96243]	ATGAACATGCCGGCCGGACTCCTCGGCAAGCGCGCGCAACTGTTCGCGGGCACGAACCTGCGCGCGCTCGCGGGCCCGATCCTCATCTGCATGATTCTGGGGATGATGATCCTGCCGCTGCCGCCGCTGCTGCTCGATCTGTTCTTCACGTTCAACATCGCGCTGTCGGTGATGGTGCTGCTCGTCAGCATGTACACGATGAAGCCGCTCGATTTCGCCGCGTTCCCGAGCGTGCTGCTGTTCTCGACGCTTTTGCGCCTGTCGCTGAACGTCGCGTCCACCCGCGTCGTGCTGCTCGAAGGTCACACGGGCCCGGACGCGGCCGGCCAGGTGATCGAGGCGTTCGGCCACTTCCTCGTCGGCGGCAACTTCGCGGTCGGCATCGTCGTGTTCGTGATC…
VFG002525(gb|YP_109896) (cheY) chemotaxis protein CheY [Flagella (VF0430)] [Burkholderia pseudomallei K96243]	GTGACGGAACATGAATCTGGAAAGGAACAGACGATGGACAAGAGCATGAAGATTCTGGTGGTGGACGATTTTCCGACGATGCGTCGGATCGTCCGCAACTTGCTGAAAGAGTTGGGCTATTCGAACGTCGACGAGGCGGAGGACGGCCTGGCCGGCCTCGCGCGGCTGCGCGGCGGCGGCTACGACTTCGTGATCTCCGACTGGAACATGCCGAACCTCGACGGTCTCGCGATGTTGAAGGAGATCCGCGCGGACGCGTCGCTCACGCACCTGCCGGTGCTGATGGTGACGGCCGAGTCGAAGAAGGAGAACATCATCGCGGCTGCGCAGGCGGGCGCGAGCGGCTACGTCGTGAAACCGTTTACGGCGGCGACGCTCGACGAGAAGCTCAACAAGATT…
VFG004125(gb|NP_460113) (csgD) DNA-binding transcriptional regulator CsgD [curli fibers/thin aggregative fimbriae (AGF) (AI094)] [Salmonella enterica subsp. enterica serovar Typhimurium str. LT2]	ATGTTTAATGAAGTCCATAGTAGTCATGGTCACACACTATTGTTGATCACAAAGCCATCTCTGCAAGCTACGGCATTATTGCAACATTTAAAGCAATCGCTGGCCATAACCGGAAAACTGCATAATATTCAACGTTCTCTGGAAGATATCTCGGCCGGTTGCATTGTTTTAATGGATATGATGGAAGCGGATAAGAAGCTTATCCACTATTGGCAGGATAATTTAAGCCGCAAAAACAATAATATAAAAACATTATTGTTAAATACCCCTGACGATTATCCCTACCGTGAAATTGAAAACTGGCCTCATATTAACGGCGTGTTTTACGCTACTGAAGACCAGGAACACGTGGTCAGCGGATTACAGGGTATTCTGCGTGGCGAATGCTATTTTTCACAA…
VFG004155(gb|NP_459028) (bcfC) fimbrial usher [bovine colonization factor (Bcf) (AI058)] [Salmonella enterica subsp. enterica serovar Typhimurium str. LT2]	ATGCGTAATCAGCTTTTCATGACGCGATATTACTCCAGCGTAACTAAACCCGTATTAACCCCGCTGGCGTTGGCTATCGCACTGGCGCCTGCGCCGGGGTGGGCGGAAAACTATTTCAACCCGGCATTTCTGTCTGACGACCCGTCTGCGGTGGCCGACCTATCGACCTTTTCCCGTAATGCCCAGGCGGCGGGGATGTATCGCGTTGACGTTTACCTGAACAATACGTTTCTCGCAACCAGAGACATTGCCTTCCAGGCGGTGAAAACGACGGGAAAAAGCGCGCCCACCGATGACAGCGGATTACGCGCCTGCCTGACGCCTGAAATGCTTAAAAATATGGGGGTAAACACCGGGGCGTTTCCACTGTTGGCGAAGGCGGCGGCGGGAAGTTGCCCG…
VFG007162(gb|NP_798051) (vscR) type III secretion system C-ring protein VscR [T3SS1 (VF0408)] [Vibrio parahaemolyticus RIMD 2210633]	ATGATTCAGTTACCTGATGAGCTAAACCTCATTGTCAGCCTTGCGCTGCTGGCATTGATCCCGTTTATCGCCATGATGGCGACCTCATTTGTGAAACTCGCGGTCGTGTTTTCGCTGCTGCGAAATGCGCTTGGCGTACAACAGATTCCGCCGAATATGGCGCTTTATGGCTTGGCGATCATTTTGTCGATTTTCATCATGGCACCGGTTGGCTTTGAAACGTACGACTACGTAAAACAGCACGACATTTCTTTGGAAGACTCAGCCAGCGTTGAGGGCCTGATTGAAAGTGGTTTACAGCCGTATCGCGAGTTTTTGAAAAAGCACATTCGTGAAACCGAAGCGATATTTTTTACCGACGCAGCACGCACGCTGTGGCCACAAAAATACGTGGACCGT…
VFG012362(gb|NP_290254) (espB) Type III secretion system translocator protein EspB, pore protein [TTSS (VF0191)] [Escherichia coli O157:H7 str. EDL933]	ATGAATACTATTGATAATACTCAAGTAACGATGGTTAATTCCGCTTCGGAGAGTACGACCGGCGCTTCCAGTGCAGTTGCCGCATCTGCTTTATCAATTGATTCATCTCTGCTTACTGATGGTAAGGTTGATATTTGTAAGCTGATGCTGGAAATTCAAAAACTCCTCGGCAAGATGGTGACTCTATTGCAGGATTACCAACAAAAACAATTGGCGCAAAGCTATCAGATTCAGCAGGCCGTTTTTGAGAGCCAGAATAAAGCTATTGAGGAAAAAAAAGCCGCGGCAACCGCTGCTTTGGTTGGCGGGATTATTTCATCAGCATTGGGGATCTTAGGTTCTTTTGCAGCAATGAACAACGCGGCTAAAGGGGCTGGTGAGATTGCTGAAAAAGCAAGC…
VFG012436(gb|NP_288437) (espFu/tccP) Type III secretion system effector TccP [LEE encoded T3SS (SS020)] [Escherichia coli O157:H7 str. EDL933]	ATGATTAACAATGTTTCTTCACTTTTTCCAACCGTCAACCGCAATATTACAGCTGTATATAAAAAAAGCAGCTTCTCTGTATCACCACAGAAAATCACATTAAATCCTGTAAAAATCAGCTCACCTTTTTCACCAAGCAGTAGCTCCATCAGCGCAACAACTCTCTTTCGAGCCCCAAACGCCCATTCGGCATCATTTCATCGACAGTCTACTGCTGAAAGTTCGTTACATCAACAACTTCCTAATGTGAGGCAGCGCCTGATACAACATCTTGCAGAGCATGGCATTMAACCAGCCCGGAGTATGGCTGAACATATTCCTCCGGCACCTAAGTGGCCTGCGCCACCACCGCCAGTACAAAATGAACAATCAAGACCTCTGCCTGATGTGGCTCAGCGT…
VFG012438(gb|NP_288436) (espJ) Type III secretion system effector EspJ, adenosine diphosphate (ADP) ribosyltransferase [LEE encoded T3SS (SS020)] [Escherichia coli O157:H7 str. EDL933]	ATGTCAATTATAAAAAACTGCTTATCATTAATTAACAATGCATTAAATATACAAAAAACATCATATTCTCTGACCAAAATGGAGCAGGCAGGGAAGTTGTTAAATAGAAAAATAACTCCAGAAAATACTCCTCCAATGTTGTTATCATACAGAAATGCAGATTTAACGCAAGAAAAAAACATTACAGAAAGAGTTTTATCCATATTTAAAATAAAACGAGATTTTGTTGCTGTAAGAATCCAAAACAATCAGTTTACTGATTTGAAAAACAAAAAAATTCAAGGCCATCAAAACACAGTTGCCAGTGTCATGGATTGGTATAATCCCCAAAAAAATGCTTTGGGTATAACTATGGGTACACCAAGAAAATCGGCCGATATAGCAAAAGAAGAGCACAGA…
VFG013063(gb|YP_405020) (shuS) heme/hemoglobin transport protein ShuS [Shu (VF0256)] [Shigella dysenteriae Sd197]	ATGAACCACTACACACGCTGGCTTGAGTTAAAAGAACAAAATCCCGGAAAGTACGTGCGTGACATCGCAGGGTTAATGAATATTAGAGAAGCAGAACTGGCATTTGCACGAGTCACGCACGATGCGTGGCGGATGCGCGGCGATATCCGTGAAATTCTGGCGGCGCTCGAAAGTGTTGGCGAGACCAAATGTATTTGCCGTAATGAATATGCAGTCCATGAGCAAGTTGGTGCGTTCACAAACCAGCATTTGAATGGACATGCCGGATTGATCCTCAATCCACGCGCGCTGGATTTACGTCTGTTTCTCAATCAATGGGCCAGTGTTTTCCACATCAAAGAAAACACGGCTCGTGGCGAACGCCAGAGGATTCAGTTCTTTGATCATCAGGGCGATGCA…
VFG013064(gb|YP_405019) (shuA) outer membrane heme/hemoglobin receptor ShuA [Shu (VF0256)] [Shigella dysenteriae Sd197]	ATGTCACGTCCGCAATTTACCTCGTTGCGTTTGAGTTTGTTGGCTTTGGCTGTTTCTGCCACCTTGCCAACGTTTGCTTTTGCTACTGAAACCATGACCGTTACGGCAACGGGGAATGCCCGTAGTTCCTTCGAAGCGCCTATGATGGTCAGCGTCATCGACACTTCCGCTCCTGAAAATCAAACGGCTACTTCAGCCACCGATCTGCTGCGTCATGTTCCTGGAATTACTCTGGATGGTACCGGACGAACCAACGGTCAGGATATAAATATGCGTGGCTATGATCATCGCGGCGTGCTGGTTCTTGTCGATGGTATTCGTCAGGGAACGGATACCGGACACCTGAATGGCACTTTTCTCGATCCGGCGCTGATCAAGCGTGTTGAGATTGTTCGTGGA…
VFG013065(gb|YP_405017) (shuT) periplasmic binding protein ShuT [Shu (VF0256)] [Shigella dysenteriae Sd197]	TTGAATCGACGGTTGTATTTCATATATAACTCAAATGATAATCATGATCATTCTCAATTTGATAAGAGTTCTCATATTATGCCAAGGATCATCACTAGGCCGTTTCTTTTTACCCCACTGACGTTATGTATTTCAGCCGTGGCCTCTGCCTCGAAGAGCACGGTAAAACGAAAAAAATTGTTTACGGCAGTACTGGCTCTTAGCTGGGCTTTTAGCGTAACGGCTGCCGAACGTATCGTGGTCGCAGGAGGATCGCTGACGGAGCTAATCTACGCGATGGGCGCTGGCGAACGCGTGGTTGGTGTCGATGAAACGACATCTTATCCACCAGAAACCGCCAAACTGCCGCATATTGGCTACTGGAAACAACTCAGCAGCGAAGGCATTTTGTCACTTCGC…
VFG013067(gb|YP_405016) (shuX) shu locus protein ShuX [Shu (VF0256)] [Shigella dysenteriae Sd197]	ATGAGCCATGTCTCGTTACAAGAATTTTTGAAAACGGAGCCGGACGGTACGCTGGAAGTGGTAGCCGAACAATACAACACCACACTGCTGGAGGTAGTGATAAATCTACCCTTCTCTACCGTAGTGCCAGGCGATAAATTCGATACTGTCTGGGATACCGTCTGCGAATGGGGCAACGTCACCACGTTAGTACATACTGCCGATGTAATCCTCGAATTTAGCGGCGAACTGCCTTCGGGTTTCCATCGCCACGACTATTTCAACCTACGCGGAAAACACGGCATGTCCGGGCATATCAAAGCAGAAAACTGCACGCATATTGCCTTAATCGAACGTAAATTTATGGGCATGGACACCGCGTCCATTCTCTTTTTCAACAAAGAAGGCAGCGCCATGCTG…
VFG013068(gb|YP_405015) (shuY) shu locus protein ShuY [Shu (VF0256)] [Shigella dysenteriae Sd197]	ATGACGCCGTGGCTACTCTTTGGCGCAGGCGGAAAAGGTGTGGGTGCCAGAACGCTTGAACTGGCGCTGGCGGAACAACGTCCGGTTGTTGCTGTCATTCGTCATGCCGATGTCGCCACGAAACTGGCGCAACAAGGCGTACAGGTTTTTACAGGCGACGCCTGTGATGCCAGCGTAGTCGCGGCTGCTTGCCGCGCAGCTGGCCCGGATGCGCTTATCATCTCAACAATGGGAGGAGCTCAGGATTATCTGGCGCACAGAACAGTGATTGATGAGGCCGAAAAGGCAGGCATCAGTCGCATGATTCTGGTGACTTCTTTGGGATGCGGCGATAGTTGGCCGTTCTTATCGGATCGGGCAAAAGCCGCGTTTGGTCAGGCGGTGCGCGAAAAGACACTG…
VFG013069(gb|YP_405014) (shuU) permease of iron compound ABC transport system [Shu (VF0256)] [Shigella dysenteriae Sd197]	ATGGGGCTATCACTATTATTGCTTGCCCTGGTGCTGTTCGGTGCTAGTCAGGGAGCGTTAAAGATCAGTTTTGATGCCCTTTTTGGTGAGGAATACCGCGATATCTGGCTCAATATTCGTCTACCACGGGTTTTGCTGGCGGTGCTGGTAGGTGCAGCGTTGGCAACCGCAGGGGTAATTATGCAGGGGCTTTTTCGCAACCCAATGGCTGACCCAGGATTACTTGGCGTCAGTAGCGGTTCTGCATTAATGGTTGGCGTTGCTATTGTGCTGCCCTTCTCCTTCCCAGTGGTGCTGGTGCTCTATGAGCAAATGGTGTTTGCCATTGCCGGAAGTTTAGTAGTCTGCACCATCATTTTTCTCATCACGCAGCGCCATCGCGATGGCAGCATGATGCAA…
VFG013070(gb|YP_405013) (shuV) ATP-binding component of hemin transport system [Shu (VF0256)] [Shigella dysenteriae Sd197]	ATGATCAGCGCCCAGAATCTGGTTTATAGCCTTCAGGGGCGGCGTCTGACTGATAATGTCTCGCTGACTTTTCCCGGTGGGGAAATTGTTGCCATTCTCGGCCCTAATGGTGCGGGAAAATCTACGCTGCTTCGCCAGTTAACCGGCTATCTTCAACCTGATAGCGGCGAATGTCGGTTGTTTAATAAGCCATTAAATGAATGGTCGATTACTGAACTGGCGAAACACCGGGCCGTGATGCGTCAAAATAGCCACATGGCGTTTCCATTCAGCGTACAAGAAGTTATCCAGATGGGGCGGCATCCGCATCGTACTGGTAATCAGGATAATGAAACAGCACAAATAATGGCGTTATGTGACTGTCAGGCGTTAGCAAACCGCGACTATCGGCAATTATCC…
VFG013368(gb|NP_439034) (rffG) dTDP-glucose 46-dehydratase [LOS (CVF494)] [Haemophilus influenzae Rd KW20]	ATGAATATTTTAGTCACTGGCGGTTCTGGCTTCATCGGTTCCGCTCTTATTCGATATATCATTAATCATACTCAAGATTTCGTTATCAATATTGATAAGCTGACCTATGCAGCAAATCAATCAGCCTTGAGAGAGGTAGAAAATAATCCTCGTTATGTCTTTGAAAAAGTTGATATCTGTGATCTTAACGTAATAGAAAACATTTTCGAAAAATATCAGCCTGATGCGGTGATGCATTTGGCGGCAGAAAGTCATGTCGATCGTTCTATTTCAGGAGCGGCTGATTTTGTTCAAACGAATATTGTTGGTACTTATACGTTATTAGAGGTCGCTAAGAATTATTGGCATACTTTAGACGAGGCTAAAAAAACGACCTTTCGATTTCACCATATTTCTACA…
VFG033805(gb|YP_003498587) (nleD) Type III secretion system effector NleD [NleD (VF0342)] [Escherichia coli O55:H7 str. CB9615]	ATGCGCCCTACGTCCCTCAACTTGGTATTACATCAGTCATCAACGTCGAGCTCAATGTCAGATACAGATATCGAGTCTCTTGTAAAAGCATCGAGCGTTCAATGGATAAAAAATAATCCGCAACTTCGTTTCCAGGGGACTGATCATAATATATATCAGCAGATTGAAGCAGCACTCGATAAGATTGGCTCTACAGAGACAGGGCGTGTACTCCTGAATGCTATTGAATCAATATCCCGACTTAAATCAGAAACAGTGGTAATACACCTCAACTCTTCCAGACTAGGAGTTATGGCACATAGAGATATAGATGCTGAGAACCATCGGGGGACTGGTTCCGATTTTCACTGTAATCTGAATGCAGTTGAATATCCCTGTGGGGAGGGGATTAGCGTGGTG…
VFG034746(gb|NP_287316) (espK) Type III secretion system effector EspK [LEE encoded T3SS (SS020)] [Escherichia coli O157:H7 str. EDL933]	ATGCTTCCTACATCGCAATTACGACCGACCGGGACATTCTGCTCCTATTCCGCTGAAACATCAGCAGACATCAAAAGCGAAATCACACCAATTCAGATAGAAGAAGCGCGGGCCAGTGGTCGTTTATATATCAAAGATTGTGATATTGAGTATCTGCCACAGTTACCAAACGAAATAACATCAGTTACAATCGAAAACTGCAACAACCTGACAACCCTTACAGGATTGCCGGTTAATACACAAAACCTCTCCGTCATTAACTGTGAAAAATTACAAATCACAGACATGCCATCAACCGTAAAAAATCTACATATTGAATTAACTGATTCACCATTTATACATTTCATATCTGAAGGCATCGAGTGCCTGACGGTTTGCCACTGCTATATATCTGGAGTG…
VFG034754(gb|NP_288154) (espL1) Type III secretion system effector espL1 [LEE encoded T3SS (SS020)] [Escherichia coli O157:H7 str. EDL933]	ATGAGTCAAAACGACATTATTATCAGAACTCATTATAAGTCTCCTCATAGAATGCACATCGATAGCGACATACCAACGCCTTCATCAGAGCCTATTAATCAATTTGCGCCCCAACTCATCACCCTACTTGATACCTCTGACTTAAGTTCGATGCTGTCATACTGTGTTACTCAGGAATTTACCGCAAACTGTCGAAAAATATCACAAAATTGTTATTCCACTGCCCTTTTTACCATTAACTTTGCCACTTCACCCATCCATGCAGAAAATATATTCATTACATTACACTATAAAAAAGAAATCATTTCCTTATTACTGGAAACCACGCCTATTAAAGCTAACCATTTGCGAAGCATACTGGATTATATTGAACAGGAACAGTTAACTGCCGAAAATCGT…
VFG034761(gb|NP_289551) (espL2) Type III secretion system effector espL2 [LEE encoded T3SS (SS020)] [Escherichia coli O157:H7 str. EDL933]	ATGCCAATAATAAACAAATCGGCATCAAATTATGTTGAATATATTTCAAAAAACAATCCCCCTTATTTATCAAAAAAGAGAGATGCCAGTATAAATCTAAATGGAAAGGTTAGTGATTGCAATGGGGAAATCATATGGTGTCGACATATAGCATCATATTGGAGTGAGTTTTTTTGTAGTAATTCAGGAAAGATAGACTACGAAACATTTTCATCCCCTCAATTATTAAGCAAAGCTATTGTAATTCAGGAAAACAAGGGGACAAATAATATTAAGGGTGATGTGTATTTTGTTGAAAATGAATCTTGGGGAAGCGTTATATATAACCTTTTTCTTCAACTTGAGAAAGAGAATAAATCTCACACATCATTAGAAGTTCATTCTCCCGGACATGCAATG…
VFG034772(gb|NP_290644) (espL4) Type III secretion system effector EspL4 [LEE encoded T3SS (SS020)] [Escherichia coli O157:H7 str. EDL933]	ATGATTACTCATATTCCTCGTAGTTCTTTCTCTGCAAATATTAATAATACAGCCCAGACAAATGAACACCAAACCCTGAGTGAATTGTTTTATAAAGAACTCGAGGATAAATTTTCTGGCAAGGAGCTGGCGACACCTCTATTAAAAAGCTTCTCAGAGAACTGTAGACACAATGGTCGCCATATCTTTAGTAACAAGGATTTTGTCATTAAGTTTTCCATATCTGTCTTACAAGCTGATAAGAAAGAAATTACGATAATTAATAAAAATGAAAACACGACACTCACTCAAACCATTGCTCCAATATTTGAAGAATACCTAATGGAAATTTTACCTCAACGCTCAGACGCTCTTGATAAAAAAGAATTAAATCTAAACTCAGATAGAAAAGAAAAAGAA…
VFG034778(gb|NP_287949) (espM1) Type III secretion system effector EspM1, Rho guanine exchange factor [LEE encoded T3SS (SS020)] [Escherichia coli O157:H7 str. EDL933]	ATGCCAGTAAATGCGACAGGTGTGTCCTTCAGCTCTTTTGGTATCAGTTATCATAAAGATAATTCTTTCCGGGGCACCATCCGTGGGAAGAATGATGAGGTCGTGAAGTGTTCAATGGGAGAGCGCTCTATCCGCTTTAATGTTAACAAATTTAGCGGCTGTATACTGGAGACGGTAAGCAGGCAGAGTACTAAAGATATTCATGGATGGGTAAGTGATGAACGGACAGTATATCCGTCAAGGGTTATCAACCAAGAGATTGATAATTGCTGCCTTCAAAAAAATGCAAAAATTTCTTCTGAAGAGAGGAAAATGGTCTTTTCTCTTGTAAGTAAGGAGTTTGAACTAACTCTTGATGTTAAAGCGGCACAAAGTTCTATTAATCATATAATAATAGGA…
VFG034786(gb|NP_289175) (espM2) Type III secretion system effector EspM2, Rho guanine exchange factor [LEE encoded T3SS (SS020)] [Escherichia coli O157:H7 str. EDL933]	ATGCCGATGAATACTACAGGTATGTCTTTCAGCTCTTTTGGTATAAGTTGCCATAGAGAGAACTCCTTCAGGAACTCTTTCCGAGGGAAGAATGATGAGGTCGTAAAATGTTCAATTGGAGAACGGACTATTAGCTTTTCTGTTCGCAAATTTAGCGGCAATATACTGGAAACGGTGAGAAGGCAGAGTACTAAAGATATTGATGAGTGGATAAAAGATGAACGGATAGTATATCCCTCAAGGGTGATCAACCAGGAGATTGATAATTACTGTTTTCAAAAAAATGCAAAAATTTCCACTGAAGAGAGGCAAAGAGTCTTTTTTCTTGTGAGCCAGGAGAATCAACTAACCCTTGATGTTAAGGCAGCACAAAGTTCTATTAATCATGTAATAATGGGG…
VFG034795(gb|NP_287312) (espN) Type III secretion system effector EspN [LEE encoded T3SS (SS020)] [Escherichia coli O157:H7 str. EDL933]	TTGGATAGCAATAGAAAATCATACAATAATGAAATTTTTAACAATTTCTCTTTTGATAAGTCTGTAAAGTTGAATTCATATAACTATATTGCAGATGATATAGAGCAAGTAATCGATAAAGGAAGCAAAGTTCAATTGGAGGTATATAATTTATTATCCGAAGAAAAGATATTTGAACATAAAATTATGAATAATTGGACAAGGAGCATAAAAAATATATTGACGACATATTTGTTTATGTCATCAGGAGCGGTGACAGCCAGAAATGTTCAAACCTTTTCTCCAACAATAAATAATGAGTCAAGGATTCGATTGCCGAGAGCATTGCCAGTAGGCCATCCATATCCTGAGGAACATAAGGCTTCTGGTTTCTCCCCTTTTATGATGGGGGGGCTGAGT…
VFG034815(gb|NP_287686) (espR1) Type III secretion system effector espR1 [LEE encoded T3SS (SS020)] [Escherichia coli O157:H7 str. EDL933]	ATGAAATTCCCTTCAATATTTAACAAAATAAAACCACAATCCATACAGCAACATCCAGAAAAAAATCAACTTAACTGGATGCTCGAATTAAATAAATGGAAAGAAGAACGTATACTTACAGGTGAAATCCATCGTCCGGAATGTCGAAACGAAGCCGCTAAAAGGATAAACTGTGCTTTTTTGTCGAAACAGAATGACATTGATTTATCAGGACTTAATTTATCTACTCAACCACCAGGGCTGCAAAACTTCACCTCTATCAATCTTGATAATAACCAACTCACACATTTTGATGCAACCAACTACGATAGACTCGTAAAACTTAGTCTGAATAGTAACACTCTTGAGTCAATAAATATTCATCAAGGCAGAAATGTAAGCATTACACATATATCTATG…
VFG034825(gb|NP_288394) (espR3) Type III secretion system effector espR3 [LEE encoded T3SS (SS020)] [Escherichia coli O157:H7 str. EDL933]	ATGTTTCCATTAAATGATCTGTCGTTAAAAACTCAGTCGGTTCAATTAAATAAAATCACATCGAATACTGAGTCTACGATAAAACAACACGAGTTAGTATCTGATGATGCAATCATAAATGAATTATCAAGTGAGTTAGTCAGTTGTCTTGGAAATGATAAGTTTACACCAGTTAGTGAAGACWGCAACTTACTGAATATGCTGTCTGAATTTAAGTTATTGAGAGAGCAATGTTTCAGGTGGGGTAATTATACTCTATTGTTTGAAAATTATGGGGCTTATGATAAGACGGGATCTATCACGATAGAAAAAAGTCAGGGGGAGGGGACTTTACCCATTCGGCATAAATTAGAGTTTATATCGACCAATATTGCAGAGTTGCTGGACAAGTTAACCAAA…
VFG034831(gb|NP_288396) (espR4) Type III secretion system effector espR4 [LEE encoded T3SS (SS020)] [Escherichia coli O157:H7 str. EDL933]	ATGTTTCCATTAAATGATCTGTCGTTAAAAACTCAGTCGGTTCAATTAAATAAAATCACATCGAATACTGAGTCTACGATAAAACAACACGAGTTAGTATCTGATGATGCAATCATAAATGAATTATCAAGTGAGTTAGTCAGTTGTCTTGGAAATGATAAGTTTACACCAGTTAGTGAAGACTGCAACTTACTGAATATGCTGTCTGAATTTAAGTTATTGAGAGAGCAATGTTTCAGGTGGGGTAATTATACTCTATTGTTTGAAAATTATGAGTCTTATGATAAGACGGGGTCTATCACGATAGAAAAAAATCAGGGGGAGGGGACTTTACCCATTCGGCATAAATTAGAGTTTATATCGACTAATATTGCAGAGTTGCTGGACAAGTTAACGAAA…
VFG034840(gb|NP_289177) (espW) Type III secretion system effector EspW [LEE encoded T3SS (SS020)] [Escherichia coli O157:H7 str. EDL933]	ATGCCCAAAATATCATCAGTTGTATCATCATGTTACCATCTGTTCAGTGAACATCAACAACTTTCAAATGAAACAACAATGACGAACCCCGTCTCCAGAAGAATTGTTCATAAAGAATATGGTATATCTTTAAAATCCGTTCCTGTATGGTTGGCTACAGCTAAAACTCCCCTTGCTCTACTCAATGGCAGACATACAAGAAGTCACTCATTTATTATTGCAGGGACCCCAGGAATGGGAAGCAGGAGCGGAGCCCAATACTATGCCATAAACAGTGATGATAAACGCTCCCGAATAGACATTGACTCTTTATTTTTAAAAAAGTTAAATAATGTGCGAAATCAAAATAAATTTCCAATCGATGTAAAAGAAACGGTTATAAAACTACAAGGGCAAAAA…
VFG034849(gb|NP_285716) (espX1) Type III secretion system effector EspX1 [LEE encoded T3SS (SS020)] [Escherichia coli O157:H7 str. EDL933]	ATGACAGATGGTATCTCAACTTCGCCACATTGTCTTTATAAATCAAATATAGTAGATGATGTAATAATAAATAAAACAAGACAAAATGAGTTAGTAAAAGTGTTTTGCGAGTATAAAACAGAGTTCTTAATTTTGTTTGATGACTTTTTCAGAAGCCAGGATTTGCCTAAACCATCTCCAGTCCTCCATCATTTTTTTCAATATACTCATCTGAGAGATGCACATTTTTATAGATGTAAACTCATAGAACATACAGTTCAATTTTCTTTTTTTAAACACAAAGGCATCACATTACTTAGATTGGATGTTTTTGATGACAGAACAAGCGAATGTCTTTCTGAAGAGATTAAGATATATCAAGAATGCCATGAAAAATTTATTAAATTTTTAAAGGCAAAC…
VFG034859(gb|NP_286562) (espX2) Type III secretion system effector EspX2 [LEE encoded T3SS (SS020)] [Escherichia coli O157:H7 str. EDL933]	ATGGATTGTTCAAAATGCAATGGTTATGCGACGATGTTATTAAATATGGTGCAGGGTTCTGACCCGGTTAATTTACTGGAATTACATGGTTTCCTTGAACATTTCGCATATTATGTTTCATTTGGCAAATTTAATGCTGGCCACCAGCGCTATAATGCATTTAAAAAATTCGTCAGTGAGATTTCGGAGATCAGCGCAAATGATATCAATATGACGATTAAAACCGGGCAATCCAGACATGAAAATGTGATCTCTATAAATATGAATGATGCAATTCCTCGTGATGAGAAAGGGATCACCGTTAGAATAGATAATATTAATGGAAAGAAAAACAACTCTAATTCATCAGATGTTTTTATTCCTTATGTAAATACATTTCCCGACCTCAAAAATAAAATA…
VFG034866(gb|NP_290672) (espX4) Type III secretion system effector EspX4 [LEE encoded T3SS (SS020)] [Escherichia coli O157:H7 str. EDL933]	ATGTTAGGTCATATCTCAAAGTTTGACGGCAATAACTCTTTGATAAAACATGGTGTGGTGCAAGGAAATAATATAGTAGATTTTGATTTACTACGTAATTTTAATGGGGGGCCAGGGTTAAATCGAGAAAACTTTATTTATATCAGCAATATTTTTTTAAATATAAAACAACGGAACGAAAAAAATCATTCAATAAATATGTTTCGTGAAGTCTCAATCAGTGGTGATATTGTAAGCGTAAAATTTTATAGAAATGAAAAAATAGAATGCGCTTGTGATTTTATGATGGCTAAAGATGCGCAGGGGTATATCGACCTGTCTGAATTGGATTTAACAAGTTGTCATTTTAAAGGTGACGTTATTTCGAAGGTGTCTTTCATATCATCAAATCTACAACAT…
VFG034873(gb|NP_290699) (espX5) Type III secretion system effector EspX5 [LEE encoded T3SS (SS020)] [Escherichia coli O157:H7 str. EDL933]	ATGCGCTATAATGGTTTAAATAATATGTTTTTCCCTCTTTGCCTGATTAACGATAACCACTCTGTCACAAGTCTATCACATACAAAGAAAACAAAATCAGATAATTACAGCAAACATCATAAAAACACGTTAATTGACAATAAAGCCCTCTCTCTTTTCAAAATGGATGATCATGAAAAAGTGATAGACTTGATTCAGAAAATGAAAAGAATTTATGATAGTTTACCATCAGGAAAAATCACGAAAGAAACGGACAGGAAAATACATAAATATTTTATAGATATAGCTTCATATGCAAATAATAAATGTGACGATAGAATTACGAGAAGAGTTTACCTTAATAAAGATAAGGAAGTGTCAATTAAGGTGGTATATTTTATAAATAATGTCACCGTCCAT…
VFG034880(gb|NP_290952) (espX6) Type III secretion system effector EspX6 [LEE encoded T3SS (SS020)] [Escherichia coli O157:H7 str. EDL933]	ATGGGCTCCCTATTTAACATATACAAAGATATTTTCCCAACACTCGGCATGTATTCGGGACTAAAAGCTTGCCATGAAAAAAACAACCTACCATTTGATATTAACACGGAAATTGAAACCATACAAAAACAAATTAATTATGATATAAATCATTTGAATGATGGTTTGATTAAGCGTGTACTGAATCTTTTTATTCACCTTATCTCTAATCCCGACAATCTTGAATTAACCTTAAATAGATATTCATCAACAACAGAACAAATCATCGGCAGAACCAAAAGAAATGGTTTACATGAGTTTGACGATGGCGATCTAAAAATAATATTTAATCGACAAGATGATAATGAAAGCGTATTAACTGTTAAAGATAAAGATAAAGATAAAGATAAAGATAAAGAT…
VFG034887(gb|NP_287310) (espX7/nleL) Type III secretion system effector NleL, putative E3 ubiquitin ligase [LEE encoded T3SS (SS020)] [Escherichia coli O157:H7 str. EDL933]	TTGAAACATATAGAAGGTTCCTTTCCTGAGGCACTCAGAAATTCCGTATATTTAAATGGCTGTAATTCATTAAATGAATCGCAATGTCAATTCCTTGCATATGATGTCAGTCAAGGCCGTGCCTGCCTGAGCAAAGCTGAGCTTACTGCTGACTTAATTTGGTTGTCAGCTAACCGAACGGGTGAAGAGTCTGCTGAAGAATTGAATTACTCTGGATGTGACTTGTCAGGTCTAAGTCTTGTAGGGCTGAATTTATCATCAGTAAATTTTTCTGGAGCAGTGCTTGATGATMCAGATCTCAGGATGAGTGATTTGTCTCAGGCTGTATTGGAAAACTGTTCTTTTAAAAACTCGATTTTGAATGAATGTAATTTTTGTTATGCTAATTTATCTAATTGT…
VFG034895(gb|NP_285753) (espY1) Type III secretion system effector EspY1 [LEE encoded T3SS (SS020)] [Escherichia coli O157:H7 str. EDL933]	ATGAAAGTATCAGTTCCAGGCATGCCGGCTACACTTTTAAATATGAGCAATAACGATATTTATAAGATGGTGAGCGGGGACAAGATGGACATGAAGATGAATATCTTTCAACGCTTGTGGGAGACGTTACGTCATCTGTTCTGGTCAGATAAACAGACTGAGGCTTATAAACTTCTGTTCAATTTCGTGAATAAAAAGGCTGGCAACATCAACGCCTCAAAATACTTTACTGGGGCTGTCAACGAGAATGAGAAAGAAAAGTTTATCCATAGTCTGGAATTATTCAATGAACTCAAAACATGCGCAAAAAATCCGGATGAGATGGTCGCAAAGGGCAATATGAGCTGGGTCGCACAGACCTTCGGTGATATCGAGTTAAGTGTCACTTTTTTTATTGAA…
VFG034901(gb|NP_285765) (espY2) Type III secretion system effector EspY2 [LEE encoded T3SS (SS020)] [Escherichia coli O157:H7 str. EDL933]	ATGAAAGTAAGAAACCCAGAACAGATTAGTATCCCTGCTAGTAATACCACTAAAGATCCAGGCCTTACTAATTCTCAGATTATCAGGATGGCTAACTTGGTCAAAAAGACCGAGAATATGAATATCTTTGAAGAGCTATGGGAGACGTTACGCAATCTCTTCCAGTCAGATAAACATTCCCAGACTGCGGCAAGGCAAATTCTGAAGGATGCATTTTATTTCCAGAATAGTGATGACTACTCAAAATACTTTACCGGGGCTGTCGACGGGAAGGCGCGTGATAAGTTAACTCACTGGCTGATAAAATTTAATGAACTCAAAGAATACGCAAAAGATCCGGAAAATATGGCCGCGAAGGCCTCACTCTCGCCAGAAGGTACGTTATGCGTCAGTTTTTTT…
VFG034908(gb|NP_286160) (espY3) Type III secretion system effector EspY3 [LEE encoded T3SS (SS020)] [Escherichia coli O157:H7 str. EDL933]	ATGATGAAAACCATCACCAAACAACCGATCCTGTTTACTGATGTACCGGTTGCAGATTTAAGAAACTCAATGAAGCAAGATTTAAATCAAAATCTTATTGAAAGGCTGTGGAACAAAATTCGTGATTTTTTTCTGGACAGTGATAAACAAAAGGCATTTAAATCGATTCATAAATACATCAATACATTGTCAGTTCTAAATTATAATTCAGCGTTAACTCCAGATCCCAACTTTAATATAGATGCAACGTCAGATTTAGACTCATATTTAAAGCTGGATTTTGATCGCCTCTCGCCCAAACAAAAACAGACCACGCTTTGTTGTTTCTGGAATAAAATTGCATCCTCATTGCCAGAGCCATACAACAGTACCATCAAACATAACATTATTTTTTATAAA…
VFG034915(gb|NP_290352) (espY4) Type III secretion system effector EspY4 [LEE encoded T3SS (SS020)] [Escherichia coli O157:H7 str. EDL933]	ATGGTCGCTAAATTAAAACCAGATGTTTTTGTTAATACTAATCCTTTTTTAGAAGCAATGTATAAGGAGAGGCTTAGTCATAAAGGCTATTCTGATAAAATTGCTTTAAGTATTAATGATAAGAAATATAATGTAAACTCTAAGGATATTGAAAATATTCTTGATGGCAAAGGGGATTTATTTAAAAAACGTACACTGTGGGAGTTTGTTCGCGATCTTTTTCCTGGCTCTCATATTAAAGAAGTCAAAGGCTTAATTTACGAATTTGTCACGAAAGTTGATAATAAAGCCGAGGTGTTCGATAAGATTAAATCTCTGGCAAAAAAAGAACAACAATGGCGATTTAGTACTAAGACAGACTTTACCACAAATGAAAATAATGAAGTTATTGTGAGTAGA…
VFG034932(gb|NP_289553) (nleB1) Type III secretion system effector nleB1 [LEE encoded T3SS (SS020)] [Escherichia coli O157:H7 str. EDL933]	ATGTTATCTTCATTAAATGTCCTTCAATCCAGCTTCAGAGGAAAGACAGCTTTATCAAATAGTACACTTCTCCAGAAAGTTTCTTTTGCTGGAAAAGAATATCCTCTGGAACCTATTGATGAAAAAACCCCTATTCTTTTTCAGTGGTTTGAAGCAAGGCCAGAGCGATACGAAAAAGGAGAAGTACCAATATTGAATACCAAAGAACATCCGTATTTGAGCAATATTATAAATGCTGCAAAAATAGAAAATGAGCGTATAATCGGTGTGCTGGTAGATGGAAATTTTACTTATGAACAAAAAAAGGAATTTCTCAGTCTTGAAAATGAATATCAAAATATAAAAATAATCTACCGAGCAGATGTGGATTTCAGCATGTATGATAAAAAACTATCTGAT…
VFG034942(gb|NP_286532) (nleB2) Type III secretion system effector NleB2 [LEE encoded T3SS (SS020)] [Escherichia coli O157:H7 str. EDL933]	ATGCTTTCACCGATAAGGACAACTTTCCATAACTCAGTAAATATAGTGCAGAGTTCACCCTGTCAAACGGTTTCTTTTGCAGGAAAGGAATATGAGTTAAAGGTCATTGATGAAAAAACGCCTATTCTTTTTCAGTGGTTTGAACCTAATCCTGAACGATATAAGAAAGATGAGGTTCCAATAGTTAATACTAAGCAGCATCCCTATTTAGATAATGTCACAAATGCGGCAAGGATAGAGAGTGATCGTATGATAGGTATTTTTGTTGATGGCGATTTTTCAGTCAACCAAAAGACTGCTTTTTCAAAATTGGAACGAGATTTTGAAAATGTAATGATAATCTATCGGGAAGATGTTGACTTCAGTATGTATGACAGAAAACTATCAGATATTTATCAT…
VFG034954(gb|NP_289554) (nleE) Type III secretion system effector NleE [LEE encoded T3SS (SS020)] [Escherichia coli O157:H7 str. EDL933]	ATGATTAATCCTGTTACTAATACTCAGGGCGTGTCCCCTATAAATACTAAATATGCTGAACATGTGGTGAAAAATATTTACCCGGAAATTAAACATGATTACTTTAATGAATCACCCAATATATATGATAAGAAGTATATATCCGGTATAACCAGAGGAGTAGCTGAACTAAAACAGGAAGAATTTGTTAACGAGAAAGCCAGACGGTTTTCTTATATGAAGACTATGTATTCTGTATGTCCAGAAGCGTTTGAACCTATTTCCAGAAATGAAGCCAGTACACCGGAAGGAAGCTGGCTAACAGTTATATCCGGAAAACGCCCAATGGGGCAGTTTTCTGTAGATAGTTTATACAATCCTGATTTACATGCATTATGTGAGCTTCCGGACATTTGTTGT…
VFG034966(gb|NP_287958) (nleF) Type III secretion system effector NleF, caspase inhibitor [LEE encoded T3SS (SS020)] [Escherichia coli O157:H7 str. EDL933]	ATGTTACCAACAAGTGGTTCTTCAGCAAATCTTTATTCATGGATGTATGTATCAGGAAGAGGTAACCCTTCGACTCCGGAATCAGTAAGTGAGCTTAATCATAATCACTTTCTTTCTCCTGAATTACAAGATAAACTTGATGTTATGGTCTCTATATATTCATGTGCCAGAAATAATAATGAGCTTGAGGAAATTTTTCAAGAGCTAAGTGCTTTTGTAAGTGGGCTGATGGATAAGAGAAATAGTGTATTTGAGGTGAGAAATGAAAATACTGATGAGGTTGTCGGAGCGCTGAGGGCGGGAATGACGATAGAGGACAGGGATAGTTATATCAGGGATCTTTTTTTTCTGCATTCATTGAAAGTAAAAATTGAGGAAAGTAGACAAGGCAAAGAAGAT…
VFG035043(gb|NP_287535) (nleG7') Type III secretion system effector NleG7, E3 Ubiquitin Ligase [LEE encoded T3SS (SS020)] [Escherichia coli O157:H7 str. EDL933]	ATGCCTATATTTTTAAACTTCACAGCAGGAAGTATCTTACCTGAGAATGAGCTAGCATCTTTACGTTATATTGTGCAGCAAAATCAAAATGATACTGTAATCATAAAAGAACGTTATAAAATGGATATCCGTTATATCGAATCAGTCAATGGTTTTACAGTAAATCCTGTATGCAGTAATCATTTCTCCATATTTATGGCGAGACAAAACACTATTGCTCGCAACCTGGAACAGCAGATCAACAACGGACGAAGTTTTGCACAAATATCTCAGGATTTTATGCTTCAATTATCTTCAAATATAGGATGGAAAAAAGGGGCCGAAAACGCCCTTAAAAATAAAATCCATTCTCATTCATTTGTTGTAAATCCTGATGAATTCTCTTGCGACACACAATTT…
VFG035062(gb|NP_286534) (nleH1) Type III secretion system effector NleH1 [LEE encoded T3SS (SS020)] [Escherichia coli O157:H7 str. EDL933]	ATGTTATCGCCATATTCTGTAAATTTGGGATGTTCATGGAATTCTTTAACCAGAAACCTGACTTCGCCTGATAATCGTGTTTTATCCTCTGTAAGGGATGCTGCCGTTCATTCTGATAATGGGGCGCAAGTAAAGGTTGGCAACAGAACATATCGTGTTGTTGCCACCGATAATAAGTTTTGCGTTACAAGAGAAAGTCATAGTGGTTGTTTTACTAATCTGTTGCACAGGCTGGGATGGCCTAAGGGGGAGATTAGCAGGAAAATTGAGGTCATGCTGAATGCATCACCAGTGAGCGCTGCTATGGAAAGAGGCATTGTTCATTCGAACAGACCTGATTTACCTCCTGTTGATTATGCACCGCCAGAGTTACCGAGTGTGGACTATAACAGGTTGTCA…
VFG035073(gb|NP_287959) (nleH2) Type III secretion system effector NleH2 [LEE encoded T3SS (SS020)] [Escherichia coli O157:H7 str. EDL933]	ATGTTATCGCCCTCTTCTATAAATTTGGGATGTTCATGGAATTCTTTAACCAGAAACCTGACTTCGCCTGATAATCGTGTTTTATCCTCTGTAAGGGATGCTGCTGTTCACTCTGATAGCGGGACGCAAGTAACGGTTGGCAACAGAACATATCGTGTTGTGGTCACTGATAATAAGTTTTGCGTTACAAGAGAAAGTCATAGTGGTTGTTTTACTAATCTGTTGCACAGGTTGGGATGGCCTAAGGGAGAGATTAGCAGAAAAATTGAGGCTATGCTGAATACATCGCCAGTGAGCACGACTATAGAAAGAGGCTCTGTTCATTCGAACAGACCTGATTTACCTCCAGTGGATTATGCGCAGCCGGAGTTACCTCCAGCGGATTATACTCAATCAGAG…
VFG037100(gb|NP_273110) (msrA/B(pilB)) trifunctional thioredoxin/methionine sulfoxide reductase A/B protein [MsrAB (VF0456)] [Neisseria meningitidis MC58]	ATGAAACACCGTACTTTCTTTTCCCTTTGCGCCAAGTTCGGCTGCCTGCTTGCGCTGGGTGCTTGTTCGCCCAAAATCGTCGATGCCGGAGCCGCGACCGTGCCGCACACTTTATCCACTTTGAAAACTGCGGACAACCGCCCCGCCAGTGTTTACTTGAAAAAAGACAAACCGACGCTGATTAAATTTTGGGCGAGCTGGTGTCCTTTGTGTCTGTCCGAATTGGGACAGACCGAAAAATGGGCGCAAGATGCAAAATTCAGCTCCGCCAACCTGATTACCGTCGCCTCCCCGGGCTTTTTGCACGAGAAAAAAGACGGCGACTTCCAAAAATGGTATGCCGGTTTGAATTATCCCAAGCTGCCCGTCGTAACCGACAACGGCGGCACGATCGCCCAA…
VFG037288(gb|YP_001847235) (basG) acinetobactin biosynthesis protein BasF [Acinetobactin (VF0467)] [Acinetobacter baumannii ACICU]	ATGATTTTATCGCCTGCTGATCAAGAGAGAATTGAGACATTCTGGAATTACTGTTTAAAACATCAATACTTCAATATTGGATATCCTGAATCTGCAGATTTTGATTATTCCGCTTTATTCCGTTTTTTCAAATTCTCTATTAATAATTGTGGTGATTGGAAAGACTATAGTAATTACGCATTGAATTCTTTTGATTTTGAAAAAGATGTGATGGCGTATTTTGCTGAAATTTTTCAAATTCCCTTTGAAGAAAGCTGGGGATACGTAACCAATGGTGGCACAGAAGGTAATATGTTTGGCTGCTATCTGGCGCGTGAGCTATTTCCTGATTCCACATTATATTACTCAAAAGATACGCATTATTCGGTGAGAAAAATCGCCAAATTATTGCAGATGAAA…
VFG038369(gb|YP_856360) (hcp) hemolysin co-regulated protein [T6SS (SS194)] [Aeromonas hydrophila subsp. hydrophila ATCC 7966]	ATGCCAACTCCATGTTATATCAGCATCGAAGGTAAAACCCAGGGCAATATCACCGCTGGTGCCTTCACTTCCGATTCCGTCGGCAACATCTTCGTGCAGGGTCACGAAGACGAGATGCTGGTGCAAGAGTTTCAACACGTCGTGACCGTCCCGACTGATCCGCAATCTGGTCAGCCTGCTGGTCAGCGTGTCCACAGGCCGTTCAAGTTCACCGTTGCGCTGAACAAAGCCGTGCCGCTGATGTACAACTCCCTGGCGTCCGGCGAGATGCTGCCGAAAGTGACCCTGAAGTGGTACCGCACCTCCGTAGAGGGCAAGCAGGAGCACTTTTTCTCTACCGTGCTGACCGATGCCACCATCGTCGACATCGACTGCCAGATGCCGCACTGCCAGGATCCG…
VFG038380(gb|YP_856367) (AHA_1833) Type VI secretion system contractile sheath large subunit TssC/VipB [T6SS (SS194)] [Aeromonas hydrophila subsp. hydrophila ATCC 7966]	TTGGTCGAAGAACAGGTTCAAGCGGGGGCGAGTGCTGCCTCCTCGTCCTTGCTGGACGAAATCATGGCGCAGGCCCGCATTACCCCGGTGGATGAGGGCTACAGCGTCGCCAAGCAGGGTGTTGCAGCCCTGATCGCCAACATTCTGGACAGCGGCACCACCAGCGATCCGGTCAACAAGGCGCTGGTGGACAGCATGATTGTCGAGCTCGACAAGAAGCTGAGCAAGCAGATGGACGTCATCCTGCACGCCAAGGAGCTGCAGGAGATGGAGTCCTCCTGGCGCTCCCTGAAGCTCTTGGTGGATCGCACCGATTTTCGCGAGAACATCAAGATCCAGGTGCTGCATGCCACCAAGGAAGAGCTGCTGGAAGATTTCGAGTTCTCACCCGAAATCACC…
VFG038395(gb|YP_856375) (clpB) type VI secretion system ATPase ClpV1 [T6SS (SS194)] [Aeromonas hydrophila subsp. hydrophila ATCC 7966]	TTGATTCGTATAGAGCTACCGGTACTGGTGGAAAGACTCAACCCCATCTGCCGTCACATGCTGGAAGAGGCTGCGGCCCTCTGCGTTAATCACCAGGGAGCCGAGATCCGCATCGAGCATTTGCTCCTGAAGATGCTGGAGACCCCGCTGAGCGATGTGCGCCAGATCCTGAAGGTGGCCGAGGTGGAGGTGGAAGAGCTCAAGACCCTGCTGCAACCGTCCGCTGCCGACAGCAGCTATGGCCAGGGTTACCCTTCCTTCTCGCCCATGCTGGTGGAGTGGCTGCAAGACAGCTGGCTGCTCGCCTCTGCCGAGCTGCAACATGCCCAGCTGCGCAGCGGTGTCATGCTGCTGGTGCTGCTGATGACCCCCCAGCGCTACCTGCCGGGTTCGGTGACC…
VFG038666(gb|YP_855914) (fliP) flagellar biosynthesis protein FliP [ND (AI144)] [Aeromonas hydrophila subsp. hydrophila ATCC 7966]	ATGAAAAAAGCTAACGGCTCACGGCCGCACGGTGGGCTGCTGGTCGGCCTGTTATCCCTCCTGATCCTCTGCTCGCCGCTGGCGCTGGCCCAGGACGGCATGTCGGCAGTCACCATCAAGACCATGGCGGATGGCAGCCAGGAATACAGCCTGACCCTGCAGGTGCTGGCGCTGATGACGGCGCTCTCCTTCCTGCCGGCCATCGTCATCATGATGACCTCCTTTACTCGCATCATCATAGTGCTCGGCATTCTGCGCCAGGCCATCGGCCTGCAGCAGAGCCCCTCCAACCAGGTGTTGATCGGCATTGCCCTGTTCATGTCGTTCTTCATCATGTCGCCGGTGCTGGATCGCATCAACAACGAGGCGCTGCAACCCTATCTGGCCGAGACCATCCAG…
VFG038682(gb|YP_855918) (flhA) flagellar biosynthesis protein FlhA [ND (AI144)] [Aeromonas hydrophila subsp. hydrophila ATCC 7966]	ATGAAACTCCAGGCATCATTGGGCCGAATCAAAGAGTACAAGTGGCTGTTGACCAAGGGCCTGGGGACGCCGCTGCTGGTGCTGGCCTCTCTTGGCATGGTGGTGCTGCCCATTCCGCCGCTGATGCTGGATATCCTGTTTTCCTTCAACATCGCGCTCTCCATTGTGGTGCTGCTGGTGGCCGTCTACACCCGCCGTCCGCTCGAATTTGCCGCCTTCCCGACCGTGCTGCTGATAGCGACCCTGCTGCGGCTGGCGCTCAACGTCGCCTCTACCCGGGTGGTGTTGCTGGAAGGCCACAACGGCAGTGCGGCGGCCGGCCACGTGATCGAAGCCTTCGGCAACGTGGTGATCGGCGGCAACTACACGGTCGGCATCATCGTCTTCATGATCCTGATG…
VFG038763(gb|YP_857330) (fleQ/flrC) FleQ protein [ND (AI144)] [Aeromonas hydrophila subsp. hydrophila ATCC 7966]	ATGGCAATGGGAGTGTTGATTGTTGACGCCGATGCGCAGCGGCGCCAACAGTTGGGGACAGTTCTCTCGTTCATGGGGATCCCCTGGCAGGACGTTGCCGAGGGCGATCTGGATGTGGCCATCGAGTCATCCGGCCCGCTGCAGGGGGTGCTGACCGGTTCCCTCAACGGCCGCCCGCTGGGCGAGCTGCTGACCGGATTCCCCCGGGTGCCTTTCCTGTCGCTGGTGGAGGCCGACTTCCCCAACAGCAACTTCATCGGGGTGGCCGAGGCGCCTTTCACCTACGAATCCCTGACCCGCCATCTGCACTTTTGCCAGGCCTTCGTCTCCCTCCATCCTCGTCAACAGACCCACGACAAGGGGCAGGCGCTGCTGCGCCTGCTGGTGGGCAAGGGCAAG…
VFG038857(gb|YP_001140278) (fliP) flagellar biosynthesis protein FliP [Lateral flagella (VF0474)] [Aeromonas salmonicida subsp. salmonicida A449]	ATGCGCCACCTGCTGTTTGCTCTGCTGTTGTGTTCGCTGCCCAGTTGGGGGGCAGACATGACATTGTTCTCGGTTTTACCGGGGGCGGAAGGTGGGGAGGACTACAACATCAAGTTGCAGATCCTGTTCTTTATGACCCTTTTGGGGCTCCTTCCGACGCTATTGCTCATGATGACCAGCTTTACCCGGATCATCATAGTGCTGGCGATTCTGCGCCAGGCGATGGGCTTGCAGCAGAGCCCTCCCAACCGTGTACTGATAGGCATCAGCTTGATATTGACGATAGTGATCATACGCCCTGTGTGGACTGACATGTATCAGCATGCATTCATCCCTTACGACCAGAATGAAATTAGCCTGTCGGAGGGGATTGCTCGGGCTGAAAAGCCCTTGCGTCAT…
VFG038916(gb|YP_855895) (rtxB) RTX toxin transporter, ATPase protein [The repeat in toxin (RTX) (CVF795)] [Aeromonas hydrophila subsp. hydrophila ATCC 7966]	ATGACTGCGCATGACGAGTCTGTTTTGGCATGCTTGAAGATTATTACCGGATTATTGGGCTGTCCCCCTAAAGATATAGATATCACGCCAGACGAACCCTTTGATATTATTGTCGATAGGCTGCAGCAGCAGACCGACAGCCAGATCCGCCAACGTCACATTGCTCCCCGCAAACTCGCCAAACAGACGCTCCCCCTGGTCCTGCTCAGTGACAACGGCAACCCCTGCGTCCTGGCCCAGCGTCAGGGGGAGCAGGCCCTGATCCTGGACCCCGCCGTCGGCAACCCGCAGGTCATCGACCAGCAGGCGCTGCTGGCTCGCTGGAACGGACGAGTCTATCAAGTACGCAGACAGCAGAGCCGCTTTGACATCCGCTGGTTCATCCCGGCCTTCCTGCAG…
VFG042219(gb|CAX32470) (espT) Type III secretion system effector EspT, Rho guanine exchange factor [LEE encoded T3SS (SS020)] [Escherichia coli ONT:H- str. FV11678]	ACAGTAAACTCCTGTGGTTTTGGATTTAGCATTACAAAAGCCCCCTATTCTTCTGGACAAAAACCAGTTATAGATGGTTTCTTTTTAGGCGCGAGGAGAATCTCATTCTCTTATCCTCGACTGGAAAGCGAGTTAATACAGTGCATTAACCTAAAAAATGAAGGAAAAAAGAATGAGTGGATGAAGGAGGAGAGTATTTGTTTTGTGTCGCGGGATGTCAATAAACTCCTGGATATGTTTGCTAAAAACAACCAGACAAACATACCTAAGGGGGTCCGGGAGCGGGTTTTTCAGCTCGCAAGTTTTTATTGCGGTTTCTCGTTGGATGCAAGATGCGCCCAGGCATCCACTCATCACATGATTTTAAATAGTCAGTATTTTCAGAAAAAAATGGATACT…
VFG043205(gb|YP_001006773) (cheZ) chemotaxis regulator CheZ [peritrichous flagella (AI145)] [Yersinia enterocolitica subsp. enterocolitica 8081]	ATGAGTAACCATCAAATGCCCGCAACAGATGCGGCATCAGCCAGTGATATAATAAGTCGTATTGGTCAACTGACGCGGATGTTACGCGACAGTTTGCGTGAGTTGGGTCTTGATCAGGCAATTGCTCAGGCGGCAGAAGCCATTCCTGATGCCCGTGACCGTCTGGACTATGTGGTTCATATGACAGCGCAGGCTGCGGAAAGAGCCTTGAACTGTGTTGAAGCAGCACAGCCGCGCCAGAATGAGCTTGAGTCATCAGCTAAAGCACTAAAAGTTCGCTGGGATGAATGGTTTGAGAACCCAATCGAGCTGTCAGATGCCCGTTCTCTGGTCACTGATACCCGTGAATATCTGGATGTAGTGCCACAACATACCTCATTTACCAATGCGCAATTATTG…
VFG043206(gb|YP_001006774) (cheY) chemotaxis regulatory protein CheY [peritrichous flagella (AI145)] [Yersinia enterocolitica subsp. enterocolitica 8081]	ATGGCGGATAAGAATCTCAGATTTTTGGTGGTAGACGATTTTTCGACCATGCGTCGTATTGTCAGAAACCTGCTGAAAGAGCTGGGTTTTAACAATGTGGAAGAAGCCGAAGATGGCGTAGACGCATTGAATAAATTACGTACGGGTGGTTTTGATTTTGTGGTTTCTGACTGGAACATGCCGAATATGGATGGCCTGGACCTGTTGAAAACTATCCGTGCTGATGGGGCGCTTGGTACTCTGCCAGTTCTGATGGTCACGGCTGAAGCTAAAAAAGAGAATATCATCGCAGCAGCGCAAGCAGGTGCCAGTGGTTATGTAGTGAAACCTTTCACTGCCGCTACCTTGGAAGAGAAGCTCAATAAGATTTTTGAAAAGTTGGGTATGTAA
VFG043209(gb|YP_001006778) (cheD) methyl-accepting chemotaxis protein CheD [peritrichous flagella (AI145)] [Yersinia enterocolitica subsp. enterocolitica 8081]	ATGTTCAAGCGTATGAAAGTGGTCACCAGCTTGCTGTTGGTGTTAGTGCTATTTGGTGCCTTACAGCTGGTTTCCGGCGGGCTTTTCTTCAACTCCCTGAAAAATGACAAAGAAAACTTCGCTGTTTTACAAGTTATCCGTCAACAACAGTCGGTGCTGAATGAAAGCTGGGTCAATCTACTGCAAACACGTAATACATTAAACCGTGCGGGCATTCGCTACATGATGGATGTGAACCACACTGGCAGCGGCCCAACAGTGAATGATCTTTTGGCTTCAGCCAAAGGCACCTTGGGTGTGGCGGCAGAGCGTTTTAAAAGCTATGAGCAAATTCCTCTGGATAGCCAACAAGATCCAGAATCAGCTAAAAAGTTAAAACAAACTTATGAGCAATACTTT…
VFG043211(gb|YP_001006780) (cheA) chemotaxis protein CheA [peritrichous flagella (AI145)] [Yersinia enterocolitica subsp. enterocolitica 8081]	GTGAGCATGGATATTACCGCGTTTTATCAGACTTTCTTTGATGAAGCAGATGAATTGCTGGCAGATATGGAACAGCACCTGTTATTGCTGGATCCGCTGGCACCTGATAATGAACAACTCAATGCCATTTTTCGTGCTGCTCACTCAATTAAGGGCGGCGCTGCGACATTTGGTTTTTCGGTATTACAAGAGACAACCCATCTGTTGGAAAACCTGTTGGATGGTGCCCGCCGCGACGAGATGCGCTTGAGCACTGATATCATCAACCTGTTTTTGGAAACGAAAGATATTATGCAAGAACAGTTGGACGCCTATAAAACCTCTCAAGAACCTAATGCAGAAAGTTTTGAGTATATCTGCCATGCATTGCGCCAACTGGCACTCGAAGCTTTAGCACAA…
VFG043212(gb|YP_001006781) (motB) flagellar motor protein MotB [peritrichous flagella (AI145)] [Yersinia enterocolitica subsp. enterocolitica 8081]	ATGAAGCATCAGAACCACCCCGTTATTCTGGTCAAAAAGCGCAAAGCCAAACATGGTCAAGCCCATCATGGCGGGTCATGGAAAATTGCTTATGCTGACTTTATGACAGCAATGATGGCCTTCTTTCTGGTGATGTGGTTACTGTCAGTTTCCAGCCCGCAAGAGCTGACGCAAATTGCAGAATATTTTCGCACGCCGTTGAAAGTTGCACTGTCCAGCGGTGAGAAAAGCAGCGACAGTACCAGCCCAATTCCTGGGGGAGGGGATGACCCGACCCAACAAGTGGGTGAAGTGCGCAAGCACATTGATTCTGAAGAAAGCCGCAAAGAAGAATATCGGCTTAATAAGTTACGGGAAAAACTGGATCAATTAATTGAATCAGACCCGCGACTGAAAGCT…
VFG043213(gb|YP_001006782) (motA) flagellar motor protein MotA [peritrichous flagella (AI145)] [Yersinia enterocolitica subsp. enterocolitica 8081]	GTGTTAGTTATTTTGGGTTATATCGTGGTCTTAGGTGCGGTTTTTGGCGGCTACATCATTGTAGGTGGTCACTTAGGCGCATTATACCAACCCGCTGAATTTTTAATTATCGGCGGGGCGGGTATTGGTGCGTTTATTGTCGGTAACAATGGTAAAGCAATAAAAGCCACAATGAAGGCACTGCCAAAACTGATGCGCCGCTCTAAATATAATAAAGTCCTATATATGGACTTAATGGCGCTGTTGTACCGCTTATTAGCAAAATCCCGTCAACAGGGAATGCTGTCATTGGAGCGGGATATAGAAAGTCCATTGGAAAGTGAAATTTTCTCTAATTATCCGCGGATCTTGGCCGATAAGGTATTAGTGGAATTTATTACCGACTATTTGCGGTTAATT…
VFG044159(gb|NP_752602) (fes) enterobactin/ferric enterobactin esterase [enterobactin (IA019)] [Escherichia coli CFT073]	GTGACGGCGTTAAAAGTAGGAAGTGAGAGCTGGTGGCAGTCGAAACATGGCCCGGAATGGCAACGTCTGAATGACGAAATGTTTGAGGTCACTTTCTGGTGGCGTGATCCCCAGGGTTCTGAAGAATACTCGACGATAAAGCGCGTATGGGTCTATATCACTGGCGTGACCGATCACCATCAGAACAGCCAGCCCCGGTCGATGCAGCGAATTGCAGGAACCGATGTTTGGCAGTGGACGACACAACTCAATGCCAACTGGCGCGGCAGCTACTGCTTTATTCCTACTGAACGCGATGACATTTTTTCTGCACCATCCCCCGATCGCCTCGAATTACGCGAAGGCTGGCGAAAACTATTACCCCAGGCGATAGCCGATCCGCTGAATCCACAAAGCTGG…
VFG044165(gb|NP_752609) (entS) enterobactin exporter, iron-regulated [enterobactin (IA019)] [Escherichia coli CFT073]	ATGAATAAACAATCCTGGCTGCTTAACCTCAGCCTGTTGAAAACGCACCCGGCGTTTCGCGCAGTATTCCTCGCTCGTTTTATCTCAATTGTTTCTCTGGGTTTGCTCGGCGTCGCGGTGCCGGTGCAGATCCAGATGATGACGCATTCCACCTGGCAGGTGGGGCTTTCGGTGACGCTGACCGGCGGCGCGATGTTTGTTGGCCTGATGGTCGGCGGTGTGCTGGCGGATCGCTATGAGCGTAAAAAAGTGATTTTGCTGGCGCGCGGCACCTGTGGCATTGGCTTCATTGGACTGTGCCTGAACGCGCTGCTGCCGGAGCCGTCATTGCTGGCAATCTATTTACTTGGTTTATGGGATGGTTTTTTCGCATCACTTGGCGTTACGGCGCTACTGGCG…
VFG045328(gb|AHY03744) (east1) EAST1 [EAST1 (VF0188)] [Escherichia coli ONT:HND str. A16]	ATGCTATCAACACAGTATATCCGGAGGCCCGCATCCAGTTATGCATCGTGCATATGCTGCGCAACAGCCTGCGCTTCGTGTCATGGAAGGAATACAAAGCCGTCACTCGCGACCTGA
VFG045349(gb|YP_002390132) (fdeC) adhesin FdeC [FdeC (VF0506)] [Escherichia coli O45:K1:H7 str. S88]	ATGTCACGTTATAAAACAGACAATAAACAGCCACGATTTCGTTATTCAGTTCTGGCCCGCTGCGTGGCGTGGGCAAATATCTCTGTTCAGGTTCTTTTTCCACTCGCTGTCACCTTTACGCCAGTAATGGCAGCACGTGCGCAGCATGCGGTTCAGCCACGGTTGAGCATGGAAAATACTACGGTAACTGCTGATAATAACGTGGAGAAAAATGTCGCGTCGCTTGCCGCTAATGCCGGGACATTTTTAAGCAGTCAGCCAGATAGCGATGCGACACGTAACTTTATTACCGGAATGGCCACCGCTAAAGCTAACCAGGAAATTCAGGAGTGGCTCGGGAAATACGGTACTGCGCGCGTCAAACTGAATGTCGATAAAAATTTCTCGCTGAAGGACTCT…
